# Supplementary material for: Interpretable machine learning reveals a diverse arsenal of anti-defenses in bacterial viruses
Source: bioRxiv preprint, doi:10.1101/2024.06.14.598830, version 1 (2024-06-14)
Supplement: Supplementary Data 1 [file 598830_file02.xlsx]

## Sheet: Contents
Sheet name	Desctiption
i	Description of defense systems predicted in 758 Vibrio genomes using DefenseFInder v.1.0.8

## Sheet: i_DefenseFinder Vibrio
Supplementary Data 1 (i): Description of defense systems predicted in 758 Vibrio genomes using DefenseFInder v.1.0.8
Vibrio strain	Contig number	Defense system type	Defense system subtype	Beginning of the system, gene number	End of the system, gene number	Number of genes in the system	Proteins in the system
62478	8	Rst_3HP	Rst_3HP	3	5	3	Hp1,Hp2,Hp3
62478	17	dGTPase	dGTPase	58	58	1	Sp_dGTPase
62478	1021	CBASS	CBASS_I	18	19	2	2TM_Gros,Cyclase_SMODS
62478	170	RM	RM_Type_I	9	11	3	Type_I_REases,Type_I_S,Type_I_MTases
62478	720	RM	RM_Type_IV	15	15	1	Type_IV_REases
62478	1021	RM	RM_Type_I	17	23	4	Type_I_REases,Type_I_S,Type_I_MTases,Type_I_S
62478	1011	Septu	Septu	3	4	2	PtuA,PtuB
72435	1040	Cas	CAS_Class1-Subtype-III-D	8	15	6	corA_III-B_III-D_1,cas2_I_II_III_IV_V_VI_13,RT_I_II_III_IV_V_VI_1,csm3gr7_III-D_2,csm3gr7_III-D_4,cas10_III-D_3
72435	16	RM	RM_Type_I	39	43	3	Type_I_REases,Type_I_S,Type_I_MTases
72435	16	RM	RM_Type_IV	44	44	1	Type_IV_REases
72435	792	RM	RM_Type_IV	1	1	1	Type_IV_REases
72435	905	DRT	DRT_2	9	9	1	drt2
72435	122	dGTPase	dGTPase	12	12	1	Sp_dGTPase
10N.222.45.A1	19	AbiH	AbiH	85	85	1	AbiH
10N.222.45.A1	76	dGTPase	dGTPase	17	17	1	Sp_dGTPase
10N.222.45.A1	97	CBASS	CBASS_I	1	2	2	2TM_5,AG_cyclase
10N.222.45.A1	10	Septu	Septu	48	49	2	PtuA,PtuB
10N.222.45.A1	22	Septu	Septu	27	28	2	PtuA,PtuB
10N.222.45.A1	51	Septu	Septu	24	25	2	PtuA,PtuB
10N.222.45.A1	35	Dnd	Dnd_ABCDEFGH	88	97	7	DndB,DndC,DndD,DndE,DptH,DptG,DptF
10N.222.45.A2	10	Dnd	Dnd_ABCDEFGH	220	229	7	DptF,DptG,DptH,DndE,DndD,DndC,DndB
10N.222.45.A2	5	Septu	Septu	195	196	2	PtuB,PtuA
10N.222.45.A2	20	Septu	Septu	128	129	2	PtuA,PtuB
10N.222.45.A2	33	Septu	Septu	50	51	2	PtuA,PtuB
10N.222.45.A2	58	CBASS	CBASS_I	4	5	2	AG_cyclase,2TM_5
10N.222.45.A2	3	dGTPase	dGTPase	371	371	1	Sp_dGTPase
10N.222.45.A2	24	AbiH	AbiH	4	4	1	AbiH
10N.222.45.A3	24	CBASS	CBASS_I	1	2	2	2TM_5,AG_cyclase
10N.222.45.A3	28	Dnd	Dnd_ABCDEFGH	219	228	7	DptF,DptG,DptH,DndE,DndD,DndC,DndB
10N.222.45.A3	15	Septu	Septu	32	33	2	PtuA,PtuB
10N.222.45.A3	18	Septu	Septu	43	44	2	PtuB,PtuA
10N.222.45.A3	77	Septu	Septu	38	39	2	PtuB,PtuA
10N.222.45.A3	31	dGTPase	dGTPase	4	4	1	Sp_dGTPase
10N.222.45.A3	43	AbiH	AbiH	4	4	1	AbiH
10N.222.45.A4	12	dGTPase	dGTPase	81	81	1	Sp_dGTPase
10N.222.45.A4	142	AbiH	AbiH	3	3	1	AbiH
10N.222.45.A4	8	Dnd	Dnd_ABCDEFGH	86	95	7	DndB,DndC,DndD,DndE,DptH,DptG,DptF
10N.222.45.A4	157	CBASS	CBASS_I	3	4	2	AG_cyclase,2TM_5
10N.222.45.A4	9	Septu	Septu	13	14	2	PtuA,PtuB
10N.222.45.A4	42	Septu	Septu	27	28	2	PtuA,PtuB
10N.222.45.A4	154	Septu	Septu	3	4	2	PtuA,PtuB
10N.222.45.A5	145	AbiH	AbiH	3	3	1	AbiH
10N.222.45.A5	192	dGTPase	dGTPase	18	18	1	Sp_dGTPase
10N.222.45.A5	86	Dnd	Dnd_ABCDE	2	5	4	DndE,DndD,DndC,DndB
10N.222.45.A5	92	CBASS	CBASS_I	3	4	2	AG_cyclase,2TM_5
10N.222.45.A5	54	Septu	Septu	38	39	2	PtuB,PtuA
10N.222.45.A5	113	Septu	Septu	1	2	2	PtuA,PtuB
10N.222.45.A5	208	Septu	Septu	3	4	2	PtuA,PtuB
10N.222.45.A8	4	Dnd	Dnd_ABCDEFGH	88	97	7	DndB,DndC,DndD,DndE,DptH,DptG,DptF
10N.222.45.A8	1	Septu	Septu	27	28	2	PtuA,PtuB
10N.222.45.A8	23	Septu	Septu	38	39	2	PtuB,PtuA
10N.222.45.A8	38	Septu	Septu	24	25	2	PtuA,PtuB
10N.222.45.A8	95	CBASS	CBASS_I	4	5	2	AG_cyclase,2TM_5
10N.222.45.A8	5	dGTPase	dGTPase	17	17	1	Sp_dGTPase
10N.222.45.A8	16	AbiH	AbiH	4	4	1	AbiH
10N.222.45.C6	92	Retron	Retron_XII	16	16	1	RT_12
10N.222.45.C6	22	RM	RM_Type_I	23	27	4	Type_I_REases,Type_I_S,Type_I_MTases,Type_I_S
10N.222.45.C6	26	RM	RM_Type_II	26	27	2	Type_II_MTases,Type_II_REases
10N.222.45.C6	79	RM	RM_Type_I	3	6	3	Type_I_MTases,Type_I_S,Type_I_REases
10N.222.45.C6	112	RM	RM_Type_I	3	6	3	Type_I_REases,Type_I_S,Type_I_MTases
10N.222.45.C6	124	RM	RM_Type_IV	1	3	2	Type_IV_REases,Type_IV_REases
10N.222.45.C6	73	Gao_Tmn	Gao_Tmn	6	6	1	TmnA
10N.222.45.C6	79	Gabija	Gabija	8	9	2	GajA,GajB_2
10N.222.45.C6	110	dGTPase	dGTPase	23	23	1	Sp_dGTPase
10N.222.45.C6	73	Septu	Septu	7	8	2	PtuA,PtuB
10N.222.45.C6	79	DarTG	DarTG	1	2	2	DarG,DarT
10N.222.45.C8	79	dGTPase	dGTPase	35	35	1	Sp_dGTPase
10N.222.45.C8	29	RM	RM_Type_IV	24	25	2	Type_IV_REases,Type_IV_REases
10N.222.45.C8	37	RM	RM_Type_III	54	55	2	Type_III_REases,Type_III_MTases
10N.222.45.E3	11	dGTPase	dGTPase	55	55	1	Sp_dGTPase
10N.222.45.E3	25	CBASS	CBASS_II	61	63	3	E2_II,Cyclase_II,Sensing_SAVED
10N.222.45.E3	9	RM	RM_Type_II	180	185	4	Type_II_MTases,Type_II_REases,Type_II_REases,Type_II_REases
10N.222.45.E4	6	dGTPase	dGTPase	89	89	1	Sp_dGTPase
10N.222.45.E4	42	Gao_Qat	Gao_Qat	54	58	4	QatA,QatB,QatC,QatD
10N.222.45.E4	3	AVAST	AVAST_I	342	343	2	Avs1B,Avs1A
10N.222.45.E4	36	CBASS	CBASS_II	14	17	4	Phospholipase,Cyclase_II,AG_E1_ThiF,Jab
10N.222.45.E4	37	Retron	Retron_I_C	30	30	1	RT_1_C1
10N.222.45.E4	8	RM	RM_Type_IV	9	9	1	Type_IV_REases
10N.222.45.E4	42	RM	RM_Type_IIG	28	28	1	Type_IIG
10N.222.45.E7	2	AbiH	AbiH	5	5	1	AbiH
10N.222.45.E7	3	dGTPase	dGTPase	368	368	1	Sp_dGTPase
10N.222.45.E7	1	Septu	Septu	27	28	2	PtuA,PtuB
10N.222.45.E7	7	Septu	Septu	128	129	2	PtuB,PtuA
10N.222.45.E7	46	Septu	Septu	50	51	2	PtuA,PtuB
10N.222.45.E7	90	CBASS	CBASS_II	5	2	3	AG_E1_ThiF,2TM_5,AG_cyclase
10N.222.45.E7	28	Dnd	Dnd_ABCDEFGH	219	228	7	DptF,DptG,DptH,DndE,DndD,DndC,DndB
10N.222.45.E8	31	CBASS	CBASS_II	285	288	4	Sensing_SAVED,Jab,AG_E1_ThiF,Cyclase_II
10N.222.45.E8	7	DRT	DRT_3	33	34	2	drt3b,drt3a
10N.222.45.E8	32	Septu	Septu	32	33	2	PtuA,PtuB
10N.222.45.E8	23	dGTPase	dGTPase	16	16	1	Sp_dGTPase
10N.222.45.E8	32	RM	RM_Type_IV	31	31	1	Type_IV_REases
10N.222.45.F4	40	CBASS	CBASS_II	15	18	4	Phospholipase,Cyclase_II,AG_E1_ThiF,Jab
10N.222.45.F4	51	Retron	Retron_I_C	30	30	1	RT_1_C1
10N.222.45.F4	18	Gao_Qat	Gao_Qat	53	57	4	QatA,QatB,QatC,QatD
10N.222.45.F4	27	AVAST	AVAST_I	74	75	2	Avs1A,Avs1B
10N.222.45.F4	30	dGTPase	dGTPase	18	18	1	Sp_dGTPase
10N.222.45.F4	1	RM	RM_Type_IV	247	247	1	Type_IV_REases
10N.222.45.F4	18	RM	RM_Type_IIG	27	27	1	Type_IIG
10N.222.45.F7	16	dGTPase	dGTPase	7	7	1	Sp_dGTPase
10N.222.45.F7	239	AbiH	AbiH	3	3	1	AbiH
10N.222.45.F7	325	CBASS	CBASS_I	1	2	2	2TM_5,AG_cyclase
10N.222.45.F7	98	Septu	Septu	29	30	2	PtuB,PtuA
10N.222.45.F7	383	Septu	Septu	4	5	2	PtuB,PtuA
10N.222.45.F7	38	Dnd	Dnd_ABCDE	82	85	4	DndB,DndC,DndD,DndE
10N.222.46.A11	77	Wadjet	Wadjet_I	1	3	3	JetB_I,JetC_I,JetD_I
10N.222.46.A11	60	dGTPase	dGTPase	17	17	1	Sp_dGTPase
10N.222.46.A11	6	RM	RM_Type_I	13	19	5	Type_I_S,Type_I_MTases,Type_I_MTases,Type_I_S,Type_I_REases
10N.222.46.A11	42	RM	RM_Type_IV	8	8	1	Type_IV_REases
10N.222.46.A1	895	dGTPase	dGTPase	1	1	1	Sp_dGTPase
10N.222.46.A1	1316	AbiH	AbiH	2	2	1	AbiH
10N.222.46.A1	227	Septu	Septu	4	5	2	PtuB,PtuA
10N.222.46.A2	67	SspBCDE	SspBCDE	34	36	3	SspD,SspC,SspB
10N.222.46.A2	28	Druantia	Druantia_III	31	32	2	DruH,DruE_3
10N.222.46.A2	25	Wadjet	Wadjet_I	1	3	3	JetB_I,JetC_I,JetD_I
10N.222.46.A2	97	Wadjet	Wadjet_I	4	7	4	JetA_I,JetB_I,JetC_I,JetD_I
10N.222.46.A2	1	Lit	Lit	10	10	1	Lit
10N.222.46.A2	20	dGTPase	dGTPase	28	28	1	Sp_dGTPase
10N.222.46.A2	28	Gao_Hhe	Gao_Hhe	12	12	1	HheA
10N.222.46.A2	1	RM	RM_Type_I	36	40	3	Type_I_MTases,Type_I_S,Type_I_REases
10N.222.46.A2	9	RM	RM_Type_I	33	35	3	Type_I_S,Type_I_MTases,Type_I_REases
10N.222.46.A2	28	RM	RM_Type_I	24	26	3	Type_I_REases,Type_I_MTases,Type_I_S
10N.222.46.A2	28	RM	RM_Type_IV	29	30	2	Type_IV_REases,Type_IV_REases
10N.222.46.A3	6	Dnd	Dnd_ABCDEFGH	96	105	7	DptF,DptG,DptH,DndE,DndD,DndC,DndB
10N.222.46.A3	24	Septu	Septu	2	3	2	PtuA,PtuB
10N.222.46.A3	30	Septu	Septu	51	52	2	PtuB,PtuA
10N.222.46.A3	48	Septu	Septu	38	39	2	PtuB,PtuA
10N.222.46.A3	43	CBASS	CBASS_I	3	4	2	AG_cyclase,2TM_5
10N.222.46.A3	11	AbiH	AbiH	4	4	1	AbiH
10N.222.46.A3	14	dGTPase	dGTPase	20	20	1	Sp_dGTPase
10N.222.46.A4	41	dGTPase	dGTPase	5	5	1	Sp_dGTPase
10N.222.46.A4	195	Lamassu	Lamassu	6	7	2	LmuB,LmuA
10N.222.46.A4	336	RADAR	radar_I	3	4	2	rdrB_I,rdrA_I
10N.222.46.A4	302	Hachiman	Hachiman	7	8	2	HamB,HamA_1
10N.222.46.A4	82	RM	RM_Type_I	11	13	3	Type_I_MTases,Type_I_S,Type_I_REases
10N.222.46.A4	145	RM	RM_Type_IV	4	5	2	Type_IV_REases,Type_IV_REases
10N.222.46.A4	189	RM	RM_Type_I	1	6	3	Type_I_MTases,Type_I_S,Type_I_REases
10N.222.46.A4	388	RM	RM_Type_I	4	6	3	Type_I_REases,Type_I_MTases,Type_I_S
10N.222.46.A4	647	RM	RM_Type_I	4	9	4	Type_I_MTases,Type_I_MTases,Type_I_S,Type_I_REases
10N.222.46.A4	24	Cas	CAS_Class1-Subtype-I-F	1	3	3	cas5f_I-F_1,cas7f_I-F_1,cas6f_I_II_III_IV_V_VI_3
10N.222.46.A4	82	DarTG	DarTG	14	15	2	DarT,DarG
10N.222.46.A4	189	Septu	Septu	4	5	2	PtuA,PtuB
10N.222.46.A6	13	RM	RM_Type_II	127	129	2	Type_II_MTases,Type_II_REases
10N.222.46.A6	34	RM	RM_Type_II	26	27	2	Type_II_MTases,Type_II_REases
10N.222.46.A6	45	RM	RM_Type_I	23	27	4	Type_I_REases,Type_I_S,Type_I_MTases,Type_I_S
10N.222.46.A6	56	RM	RM_Type_I	6	9	3	Type_I_MTases,Type_I_S,Type_I_REases
10N.222.46.A6	81	RM	RM_Type_IV	5	7	2	Type_IV_REases,Type_IV_REases
10N.222.46.A6	96	RM	RM_Type_I	4	7	3	Type_I_MTases,Type_I_S,Type_I_REases
10N.222.46.A6	60	Septu	Septu	7	8	2	PtuA,PtuB
10N.222.46.A6	96	DarTG	DarTG	2	3	2	DarG,DarT
10N.222.46.A6	110	Retron	Retron_XII	16	16	1	RT_12
10N.222.46.A6	37	dGTPase	dGTPase	16	16	1	Sp_dGTPase
10N.222.46.A6	60	Gao_Tmn	Gao_Tmn	6	6	1	TmnA
10N.222.46.A6	96	Gabija	Gabija	9	10	2	GajA,GajB_2
10N.222.46.B11	4	Cas	CAS_Class1-Subtype-I-F	64	67	4	cas6f_I_II_III_IV_V_VI_1,cas7f_I-F_1,cas8f_I-F_2,TniQ_I-F_1
10N.222.46.B11	4	RM	RM_Type_I	69	71	3	Type_I_REases,Type_I_MTases,Type_I_S
10N.222.46.B11	4	RM	RM_Type_IV	85	85	1	Type_IV_REases
10N.222.46.B11	79	RM	RM_Type_IV	24	25	2	Type_IV_REases,Type_IV_REases
10N.222.46.B11	4	Druantia	Druantia_III	72	73	2	DruH,DruE_3
10N.222.46.B11	84	Retron	Retron_I_C	2	2	1	RT_1_C1
10N.222.46.B11	29	dGTPase	dGTPase	16	16	1	Sp_dGTPase
10N.222.46.B1	28	Rst_PARIS	PARIS_II	102	103	2	DUF4435,AAA_21
10N.222.46.B1	8	Rst_DprA-PPRT	Rst_DprA-PPRT	87	88	2	DprA,Phosphoribosyltransferase
10N.222.46.B1	42	dGTPase	dGTPase	15	15	1	Sp_dGTPase
10N.222.46.B1	4	RM	RM_Type_I	103	107	4	Type_I_REases,Type_I_S,Type_I_MTases,Type_I_S
10N.222.46.B1	21	RM	RM_Type_I	129	133	3	Type_I_MTases,Type_I_S,Type_I_REases
10N.222.46.B1	24	RM	RM_Type_I	4	8	5	Type_I_REases,Type_I_MTases,Type_I_MTases,Type_I_S,Type_I_REases
10N.222.46.B1	59	RM	RM_Type_I	1	3	3	Type_I_MTases,Type_I_S,Type_I_REases
10N.222.46.B1	70	RM	RM_Type_II	1	2	2	Type_II_REases,Type_II_MTases
10N.222.46.B1	82	RM	RM_Type_I	13	17	4	Type_I_REases,Type_I_S,Type_I_MTases,Type_I_REases
10N.222.46.B1	82	Cas	CAS_Class1-Subtype-I-F	6	9	4	cas6f_I_II_III_IV_V_VI_2,cas7f_I-F_2,cas8f_I-F_2,TniQ_I-F_1
10N.222.46.B3	14	CBASS	CBASS_I	1	2	2	AG_cyclase,2TM_5
10N.222.46.B3	61	Dnd	Dnd_ABCDEFGH	23	32	7	DndB,DndC,DndD,DndE,DptH,DptG,DptF
10N.222.46.B3	82	Septu	Septu	33	34	2	PtuB,PtuA
10N.222.46.B3	158	Septu	Septu	36	37	2	PtuB,PtuA
10N.222.46.B3	182	Septu	Septu	3	4	2	PtuA,PtuB
10N.222.46.B3	67	dGTPase	dGTPase	17	17	1	Sp_dGTPase
10N.222.46.B3	76	AbiH	AbiH	4	4	1	AbiH
10N.222.46.B6	58	Gabija	Gabija	1	2	2	GajB_2,GajA
10N.222.46.B6	61	dGTPase	dGTPase	23	23	1	Sp_dGTPase
10N.222.46.B6	101	Gao_Tmn	Gao_Tmn	5	5	1	TmnA
10N.222.46.B6	31	Retron	Retron_XII	16	16	1	RT_12
10N.222.46.B6	2	RM	RM_Type_II	108	109	2	Type_II_REases,Type_II_MTases
10N.222.46.B6	35	RM	RM_Type_I	23	27	4	Type_I_REases,Type_I_S,Type_I_MTases,Type_I_S
10N.222.46.B6	58	RM	RM_Type_I	4	7	3	Type_I_REases,Type_I_S,Type_I_MTases
10N.222.46.B6	94	RM	RM_Type_I	3	6	3	Type_I_REases,Type_I_S,Type_I_MTases
10N.222.46.B6	113	RM	RM_Type_IV	5	7	2	Type_IV_REases,Type_IV_REases
10N.222.46.B6	58	DarTG	DarTG	8	9	2	DarT,DarG
10N.222.46.B6	101	Septu	Septu	6	7	2	PtuA,PtuB
10N.222.46.C10	69	CBASS	CBASS_I	1	2	2	2TM_5,AG_cyclase
10N.222.46.C10	25	Dnd	Dnd_ABCDEFGH	96	105	7	DptF,DptG,DptH,DndE,DndD,DndC,DndB
10N.222.46.C10	5	Septu	Septu	195	196	2	PtuB,PtuA
10N.222.46.C10	41	Septu	Septu	38	39	2	PtuB,PtuA
10N.222.46.C10	52	Septu	Septu	24	25	2	PtuA,PtuB
10N.222.46.C10	9	AbiH	AbiH	200	200	1	AbiH
10N.222.46.C10	22	dGTPase	dGTPase	37	37	1	Sp_dGTPase
10N.222.46.C2	12	dGTPase	dGTPase	23	23	1	Sp_dGTPase
10N.222.46.C2	30	Gao_Tmn	Gao_Tmn	61	61	1	TmnA
10N.222.46.C2	65	Gabija	Gabija	9	10	2	GajA,GajB_2
10N.222.46.C2	30	Septu	Septu	59	60	2	PtuB,PtuA
10N.222.46.C2	65	DarTG	DarTG	2	3	2	DarG,DarT
10N.222.46.C2	58	Retron	Retron_XII	15	15	1	RT_12
10N.222.46.C2	1	RM	RM_Type_I	35	39	4	Type_I_S,Type_I_MTases,Type_I_S,Type_I_REases
10N.222.46.C2	8	RM	RM_Type_IV	1	3	2	Type_IV_REases,Type_IV_REases
10N.222.46.C2	22	RM	RM_Type_II	89	90	2	Type_II_REases,Type_II_MTases
10N.222.46.C2	65	RM	RM_Type_I	4	7	3	Type_I_MTases,Type_I_S,Type_I_REases
10N.222.46.C3	1	Gabija	Gabija	1	2	2	GajA,GajB_1
10N.222.46.C3	15	Rst_HelicaseDUF2290	Rst_HelicaseDUF2290	64	65	2	Helicase,DUF2290
10N.222.46.C3	28	dGTPase	dGTPase	19	19	1	Sp_dGTPase
10N.222.46.C3	18	Retron	Retron_II	21	22	2	NDT,RT_Tot
10N.222.46.C3	1	RM	RM_Type_IIG	6	6	1	Type_IIG
10N.222.46.C3	11	RM	RM_Type_III	83	85	2	Type_III_REases,Type_III_MTases
10N.222.46.E12	8	CBASS	CBASS_II	10	13	4	Jab,AG_E1_ThiF,Cyclase_II,Phospholipase
10N.222.46.E12	15	CBASS	CBASS_II	22	26	5	Effector_2TM_S_2TMBeta,Jab,AG_E1_ThiF,Cyclase_II,Phospholipase
10N.222.46.E12	29	SspBCDE	SspBCDE	50	53	4	SspE,SspB,SspC,SspD
10N.222.46.E12	6	Septu	Septu	77	78	2	PtuA,PtuB
10N.222.46.E12	15	Dsr	Dsr_I	41	41	1	Dsr1
10N.222.46.E12	65	Septu	Septu	5	6	2	PtuB,PtuA
10N.222.46.E12	8	Gabija	Gabija	6	7	2	GajA,GajB_3
10N.222.46.E12	15	Rst_DprA-PPRT	Rst_DprA-PPRT	34	35	2	DprA,Phosphoribosyltransferase
10N.222.46.E12	28	dGTPase	dGTPase	90	90	1	Sp_dGTPase
10N.222.46.E12	10	RM	RM_Type_III	103	104	2	Type_III_MTases,Type_III_REases
10N.222.46.E12	13	RM	RM_Type_I	42	44	3	Type_I_REases,Type_I_S,Type_I_MTases
10N.222.46.E12	95	RM	RM_Type_II	1	2	2	Type_II_REases,Type_II_MTases
10N.222.46.E1	113	Retron	Retron_XII	16	16	1	RT_12
10N.222.46.E1	6	DarTG	DarTG	25	26	2	DarT,DarG
10N.222.46.E1	54	Septu	Septu	59	60	2	PtuB,PtuA
10N.222.46.E1	6	Gabija	Gabija	18	19	2	GajB_2,GajA
10N.222.46.E1	54	Gao_Tmn	Gao_Tmn	61	61	1	TmnA
10N.222.46.E1	58	dGTPase	dGTPase	23	23	1	Sp_dGTPase
10N.222.46.E1	5	RM	RM_Type_I	35	39	4	Type_I_S,Type_I_MTases,Type_I_S,Type_I_REases
10N.222.46.E1	6	RM	RM_Type_I	21	24	3	Type_I_REases,Type_I_S,Type_I_MTases
10N.222.46.E1	30	RM	RM_Type_II	25	26	2	Type_II_MTases,Type_II_REases
10N.222.46.E1	32	RM	RM_Type_IV	1	3	2	Type_IV_REases,Type_IV_REases
10N.222.46.E4	25	dGTPase	dGTPase	28	28	1	Sp_dGTPase
10N.222.46.E4	85	Cas	CAS_Class1-Subtype-I-F	18	21	4	cas6f_I_II_III_IV_V_VI_1,cas7f_I-F_1,cas8f_I-F_2,TniQ_I-F_1
10N.222.46.E4	88	Cas	CAS_Class1-Subtype-I-F	21	24	4	TniQ_I-F_1,cas8f_I-F_2,cas7f_I-F_2,cas6f_I_II_III_IV_V_VI_2
10N.222.46.E4	21	RM	RM_Type_IV	112	112	1	Type_IV_REases
10N.222.46.E4	85	RM	RM_Type_I	23	25	3	Type_I_REases,Type_I_MTases,Type_I_S
10N.222.46.E4	27	Wadjet	Wadjet_I	25	28	4	JetA_I,JetB_I,JetC_I,JetD_I
10N.222.46.E4	29	DRT	DRT_3	33	34	2	drt3b,drt3a
10N.222.46.E4	43	Wadjet	Wadjet_I	42	44	3	JetD_I,JetC_I,JetB_I
10N.222.46.E4	74	SspBCDE	SspBCDE	53	55	3	SspD,SspC,SspB
10N.222.46.E5	46	dGTPase	dGTPase	7	7	1	Sp_dGTPase
10N.222.46.E5	72	Lit	Lit	36	36	1	Lit
10N.222.46.E5	50	Cas	CAS_Class1-Subtype-III-D	29	44	11	cas10_III-D_1,csm3gr7_III-D_3,csx10gr5_III-D_4,csx19_III-D_6,csm3gr7_III-D_2,cas6_I_II_III_IV_V_VI_17,csx1_III_10,cas2_I_II_III_IV_V_VI_3,cas1_I_II_III_IV_V_VI_10,cas2_I_II_III_IV_V_VI_3,csx16_III_1
10N.222.46.E5	76	Cas	CAS_Class1-Subtype-I-F	45	48	4	TniQ_I-F_1,cas8f_I-F_2,cas7f_I-F_2,cas6f_I_II_III_IV_V_VI_2
10N.222.46.E5	76	RM	RM_Type_I	36	42	4	Type_I_REases,Type_I_REases,Type_I_MTases,Type_I_S
10N.222.46.E5	81	RM	RM_Type_II	12	16	3	Type_II_MTases,Type_II_REases,Type_II_MTases
10N.222.46.E5	76	Septu	Septu	49	50	2	PtuA_2,PtuB_2
10N.222.46.E9	38	dGTPase	dGTPase	28	28	1	Sp_dGTPase
10N.222.46.E9	1	Dnd	Dnd_ABCDE	3	6	4	DndE,DndD,DndC,DndB
10N.222.46.E9	116	Retron	Retron_I_A	1	3	3	HNH_TIGR02646,ATPase_TypeIA,RT_Tot
10N.222.46.E9	11	RM	RM_Type_I	74	77	3	Type_I_REases,Type_I_S,Type_I_MTases
10N.222.46.E9	113	Cas	CAS_Class1-Subtype-III-D	19	16	12	DEDDh_I_II_III_IV_V_VI_1,cas10_III-D_1,csm3gr7_III-D_3,csx10gr5_III-D_4,csx19_III-D_6,csm3gr7_III-D_2,cas6_I_II_III_IV_V_VI_17,csx1_III_10,cas2_I_II_III_IV_V_VI_3,cas1_I_II_III_IV_V_VI_10,cas2_I_II_III_IV_V_VI_3,csx16_III_1
10N.222.46.E9	8	Wadjet	Wadjet_I	1	3	3	JetB_I,JetC_I,JetD_I
10N.222.46.F12	17	Gabija	Gabija	49	50	2	GajB_3,GajA
10N.222.46.F12	26	Rst_DprA-PPRT	Rst_DprA-PPRT	74	75	2	Phosphoribosyltransferase,DprA
10N.222.46.F12	40	dGTPase	dGTPase	89	89	1	Sp_dGTPase
10N.222.46.F12	17	CBASS	CBASS_II	43	46	4	Phospholipase,Cyclase_II,AG_E1_ThiF,Jab
10N.222.46.F12	26	CBASS	CBASS_II	83	87	5	Phospholipase,Cyclase_II,AG_E1_ThiF,Jab,Effector_2TM_S_2TMBeta
10N.222.46.F12	3	RM	RM_Type_III	103	104	2	Type_III_MTases,Type_III_REases
10N.222.46.F12	33	RM	RM_Type_I	42	44	3	Type_I_REases,Type_I_S,Type_I_MTases
10N.222.46.F12	78	RM	RM_Type_II	3	4	2	Type_II_MTases,Type_II_REases
10N.222.46.F12	23	Septu	Septu	193	194	2	PtuB,PtuA
10N.222.46.F12	26	Dsr	Dsr_I	68	68	1	Dsr1
10N.222.46.F12	48	Septu	Septu	5	6	2	PtuB,PtuA
10N.222.46.F12	16	SspBCDE	SspBCDE	40	43	4	SspE,SspB,SspC,SspD
10N.222.46.F1	114	Dnd	Dnd_ABCDEFGH	7	16	7	DndB,DndC,DndD,DndE,DptH,DptG,DptF
10N.222.46.F1	129	Retron	Retron_II	4	5	2	RT_Tot,NDT
10N.222.46.F1	181	Rst_PARIS	PARIS_I	9	10	2	AAA_15,DUF4435
10N.222.46.F1	13	RM	RM_Type_I	7	10	3	Type_I_REases,Type_I_S,Type_I_MTases
10N.222.46.F1	68	RM	RM_Type_I	16	23	4	Type_I_REases,Type_I_REases,Type_I_MTases,Type_I_S
10N.222.46.F1	68	Cas	CAS_Class1-Subtype-I-F	29	32	4	TniQ_I-F_1,cas8f_I-F_2,cas7f_I-F_2,cas6f_I_II_III_IV_V_VI_2
10N.222.46.F1	213	dGTPase	dGTPase	16	16	1	Sp_dGTPase
10N.222.46.F2	11	Gao_Tmn	Gao_Tmn	6	6	1	TmnA
10N.222.46.F2	47	dGTPase	dGTPase	18	18	1	Sp_dGTPase
10N.222.46.F2	79	Gabija	Gabija	18	19	2	GajB_2,GajA
10N.222.46.F2	102	Retron	Retron_XII	16	16	1	RT_12
10N.222.46.F2	7	RM	RM_Type_II	107	109	2	Type_II_REases,Type_II_MTases
10N.222.46.F2	16	RM	RM_Type_I	35	39	4	Type_I_S,Type_I_MTases,Type_I_S,Type_I_REases
10N.222.46.F2	79	RM	RM_Type_I	21	24	3	Type_I_REases,Type_I_S,Type_I_MTases
10N.222.46.F2	160	RM	RM_Type_IV	1	3	2	Type_IV_REases,Type_IV_REases
10N.222.46.F2	11	Septu	Septu	7	8	2	PtuA,PtuB
10N.222.46.F2	79	DarTG	DarTG	25	26	2	DarT,DarG
10N.222.48.A11	52	Cas	CAS_Class1-Subtype-I-F	28	31	4	TniQ_I-F_1,cas8f_I-F_2,cas7f_I-F_2,cas6f_I_II_III_IV_V_VI_2
10N.222.48.A11	7	RM	RM_Type_II	21	23	2	Type_II_REases,Type_II_MTases
10N.222.48.A11	11	RM	RM_Type_III	1	2	2	Type_III_REases,Type_III_MTases
10N.222.48.A11	48	RM	RM_Type_I	8	13	4	Type_I_REases,Type_I_REases,Type_I_MTases,Type_I_S
10N.222.48.A11	52	RM	RM_Type_I	21	25	4	Type_I_REases,Type_I_MTases,Type_I_S,Type_I_REases
10N.222.48.A11	63	RM	RM_Type_IV	60	60	1	Type_IV_REases
10N.222.48.A11	78	RM	RM_Type_II	1	3	3	Type_II_REases,Type_II_MTases,Type_II_REases
10N.222.48.A11	90	RM	RM_Type_IV	18	18	1	Type_IV_REases
10N.222.48.A11	20	Zorya	Zorya_TypeII	2	5	4	ZorA2,ZorA2,ZorB,ZorE	Vibrio tasmaniensis
10N.222.48.A11	63	Gao_RL	Gao_RL	61	65	5	RL_D,RL_D,RL_C,RL_B,RL_A
10N.222.48.A11	71	Septu	Septu	77	78	2	PtuA,PtuB
10N.222.48.A11	19	CBASS	CBASS_II	62	65	4	Cyclase_II,AG_E1_ThiF,Jab,Sensing_SAVED
10N.222.48.A11	105	CBASS	CBASS_II	1	3	3	Cyclase_II,AG_E1_ThiF,Sensing_SAVED
10N.222.48.A11	6	Shedu	Shedu	110	110	1	SduA
10N.222.48.A11	21	Gabija	Gabija	2	3	2	GajB_1,GajA
10N.222.48.A11	30	Gao_Tmn	Gao_Tmn	24	24	1	TmnA
10N.222.48.A11	46	Gao_Ape	Gao_Ape	4	4	1	ApeA
10N.222.48.A11	48	Kiwa	Kiwa	14	15	2	KwaA,KwaB_2
10N.222.48.A11	50	dGTPase	dGTPase	14	14	1	Sp_dGTPase
10N.222.48.A11	60	Gabija	Gabija	91	92	2	GajA,GajB_2
10N.222.48.A1	62	Zorya	Zorya_TypeI	1	4	4	ZorD,ZorC,ZorB,ZorA
10N.222.48.A1	41	Gao_Her	Gao_Her_SIR	33	34	2	SIR2,HerA_SIR2
10N.222.48.A1	80	Septu	Septu	2	3	2	PtuB,PtuA
10N.222.48.A1	41	AbiH	AbiH	31	31	1	AbiH
10N.222.48.A1	41	Rst_DprA-PPRT	Rst_DprA-PPRT	38	39	2	Phosphoribosyltransferase,DprA
10N.222.48.A1	47	Shedu	Shedu	53	53	1	SduA
10N.222.48.A1	86	dGTPase	dGTPase	18	18	1	Sp_dGTPase
10N.222.48.A1	128	Abi2	Abi2	11	11	1	Abi_2
10N.222.48.A1	52	Cas	CAS_Class1-Subtype-I-F	1	3	3	cas8f_I-F_2,cas7f_I-F_2,cas6f_I_II_III_IV_V_VI_2
10N.222.48.A1	2	RM	RM_Type_II	168	169	2	Type_II_REases,Type_II_MTases
10N.222.48.A1	47	RM	RM_Type_I	46	48	3	Type_I_MTases,Type_I_S,Type_I_REases
10N.222.48.A1	62	RM	RM_Type_I	5	9	4	Type_I_REases,Type_I_S,Type_I_MTases,Type_I_MTases
10N.222.48.A1	109	RM	RM_Type_I	3	7	5	Type_I_REases,Type_I_MTases,Type_I_MTases,Type_I_S,Type_I_REases
10N.222.48.A1	109	RM	RM_Type_IV	8	8	1	Type_IV_REases
10N.222.48.A1	128	RM	RM_Type_I	9	13	4	Type_I_REases,Type_I_REases,Type_I_MTases,Type_I_S
10N.222.48.A1	128	RM	RM_Type_IV	14	14	1	Type_IV_REases
10N.222.48.A2	15	AbiH	AbiH	4	4	1	AbiH
10N.222.48.A2	22	dGTPase	dGTPase	368	368	1	Sp_dGTPase
10N.222.48.A2	17	Septu	Septu	27	28	2	PtuA,PtuB
10N.222.48.A2	40	Septu	Septu	70	71	2	PtuB,PtuA
10N.222.48.A2	45	Septu	Septu	38	39	2	PtuB,PtuA
10N.222.48.A2	113	CBASS	CBASS_I	3	4	2	AG_cyclase,2TM_5
10N.222.48.A2	10	Dnd	Dnd_ABCDEFGH	88	97	7	DndB,DndC,DndD,DndE,DptH,DptG,DptF
10N.222.48.A3	298	CBASS	CBASS_I	3	4	2	AG_cyclase,2TM_5
10N.222.48.A3	248	Septu	Septu	1	2	2	PtuA,PtuB
10N.222.48.A3	539	Septu	Septu	2	3	2	PtuA,PtuB
10N.222.48.A3	119	dGTPase	dGTPase	1	1	1	Sp_dGTPase
10N.222.48.A3	473	AbiH	AbiH	4	4	1	AbiH
10N.222.48.A4	3	AbiH	AbiH	3	3	1	AbiH
10N.222.48.A4	97	dGTPase	dGTPase	19	19	1	Sp_dGTPase
10N.222.48.A4	158	Septu	Septu	17	18	2	PtuB,PtuA
10N.222.48.A4	387	Septu	Septu	3	4	2	PtuA,PtuB
10N.222.48.A4	215	CBASS	CBASS_I	1	2	2	AG_cyclase,2TM_5
10N.222.48.A4	407	RM	RM_Type_II	1	4	4	Type_II_REases,Type_II_REases,Type_II_REases,Type_II_MTases
10N.222.48.A5	102	SspBCDE	SspBCDE	12	14	3	SspD,SspC,SspB
10N.222.48.A5	88	Dsr	Dsr_I	3	3	1	Dsr1
10N.222.48.A5	44	dGTPase	dGTPase	57	57	1	Sp_dGTPase
10N.222.48.A6	34	dGTPase	dGTPase	105	105	1	Sp_dGTPase
10N.222.48.A6	191	Gao_Upx	Gao_Upx	4	4	1	UpxA
10N.222.48.A6	32	Rst_PARIS	PARIS_I	9	10	2	AAA_15,DUF4435
10N.222.48.A6	164	RM	RM_Type_II	3	5	2	Type_II_MTases,Type_II_REases
10N.222.48.A6	164	RM	RM_Type_IV	4	4	1	Type_IV_REases
10N.222.48.A7	5	dGTPase	dGTPase	15	15	1	Sp_dGTPase
10N.222.48.A7	22	Lamassu	Lamassu	61	62	2	LmuB,LmuA
10N.222.48.A7	12	Retron	Retron_II	151	152	2	NDT,RT_Tot
10N.222.48.A7	22	Rst_PARIS	PARIS_I	239	240	2	DUF4435,AAA_15
10N.222.48.A7	6	RM	RM_Type_III	126	128	2	Type_III_REases,Type_III_MTases
10N.222.48.A7	6	RM	RM_Type_IV	136	136	1	Type_IV_REases
10N.222.48.A7	15	RM	RM_Type_I	258	262	3	Type_I_REases,Type_I_S,Type_I_MTases
10N.222.48.A8	26	Dnd	Dnd_ABCDEFGH	219	228	7	DptF,DptG,DptH,DndE,DndD,DndC,DndB
10N.222.48.A8	13	Septu	Septu	195	196	2	PtuB,PtuA
10N.222.48.A8	23	Septu	Septu	70	71	2	PtuB,PtuA
10N.222.48.A8	25	Septu	Septu	39	40	2	PtuB,PtuA
10N.222.48.A8	12	CBASS	CBASS_I	1	2	2	2TM_5,AG_cyclase
10N.222.48.A8	4	dGTPase	dGTPase	37	37	1	Sp_dGTPase
10N.222.48.A8	16	AbiH	AbiH	4	4	1	AbiH
10N.222.48.A9	15	dGTPase	dGTPase	17	17	1	Sp_dGTPase
10N.222.48.A9	77	Abi2	Abi2	25	25	1	Abi_2
10N.222.48.A9	110	Gabija	Gabija	1	2	2	GajA,GajB_2
10N.222.48.A9	16	Cas	CAS_Class1-Subtype-III-D	52	60	8	cas2_I_II_III_IV_V_VI_3,cas1_I_II_III_IV_V_VI_10,cas6_I_II_III_IV_V_VI_17,csm3gr7_III-D_2,csx19_III-D_6,csx10gr5_III-D_4,csm3gr7_III-D_3,cas10_III-D_1
10N.222.48.A9	70	Cas	CAS_Class1-Subtype-I-F	57	61	5	WYL_I_II_III_IV_V_VI_4,TniQ_I-F_1,cas8f_I-F_2,cas7f_I-F_1,cas6f_I_II_III_IV_V_VI_1
10N.222.48.A9	59	RM	RM_Type_IV	4	4	1	Type_IV_REases
10N.222.48.A9	59	RM	RM_Type_I	7	9	3	Type_I_REases,Type_I_MTases,Type_I_S
10N.222.48.A9	70	RM	RM_Type_IV	44	44	1	Type_IV_REases
10N.222.48.A9	70	RM	RM_Type_I	48	56	5	Type_I_S,Type_I_MTases,Type_I_S,Type_I_REases,Type_I_MTases
10N.222.48.A9	77	RM	RM_Type_I	24	27	3	Type_I_REases,Type_I_S,Type_I_MTases
10N.222.48.B1	1	AbiH	AbiH	250	250	1	AbiH
10N.222.48.B1	9	dGTPase	dGTPase	370	370	1	Sp_dGTPase
10N.222.48.B1	4	Septu	Septu	195	196	2	PtuB,PtuA
10N.222.48.B1	7	Septu	Septu	24	25	2	PtuA,PtuB
10N.222.48.B1	36	Septu	Septu	50	51	2	PtuA,PtuB
10N.222.48.B1	87	CBASS	CBASS_I	1	2	2	2TM_5,AG_cyclase
10N.222.48.B1	2	Dnd	Dnd_ABCDEFGH	221	230	7	DptF,DptG,DptH,DndE,DndD,DndC,DndB
10N.222.48.F5	3	Gabija	Gabija	203	204	2	GajA,GajB_2
10N.222.48.F5	19	dGTPase	dGTPase	149	149	1	Sp_dGTPase
10N.222.48.F5	17	Septu	Septu	85	86	2	PtuA,PtuB
10N.222.48.F5	21	DRT	DRT_4	202	202	1	drt4
10N.222.48.F5	63	Retron	Retron_III	6	7	2	PRTase_WH,RT_Tot
10N.222.48.F5	3	RM	RM_Type_I	197	200	3	Type_I_REases,Type_I_S,Type_I_MTases
10N.222.48.F5	17	RM	RM_Type_I	82	87	4	Type_I_S,Type_I_MTases,Type_I_S,Type_I_REases
10N.222.48.F5	48	RM	RM_Type_I	13	16	3	Type_I_MTases,Type_I_S,Type_I_REases
10N.222.48.F6	2	Dnd	Dnd_ABCDEFGH	222	231	7	DptF,DptG,DptH,DndE,DndD,DndC,DndB
10N.222.48.F6	8	Septu	Septu	28	29	2	PtuA,PtuB
10N.222.48.F6	16	Septu	Septu	38	39	2	PtuB,PtuA
10N.222.48.F6	34	Septu	Septu	128	129	2	PtuA,PtuB
10N.222.48.F6	84	CBASS	CBASS_I	3	4	2	2TM_5,AG_cyclase
10N.222.48.F6	15	AbiH	AbiH	250	250	1	AbiH
10N.222.48.F6	19	dGTPase	dGTPase	300	300	1	Sp_dGTPase
10N.222.48.F8	31	Dnd	Dnd_ABCDEFGH	222	231	7	DptF,DptG,DptH,DndE,DndD,DndC,DndB
10N.222.48.F8	8	Septu	Septu	50	51	2	PtuA,PtuB
10N.222.48.F8	18	Septu	Septu	3	4	2	PtuA,PtuB
10N.222.48.F8	73	Septu	Septu	43	44	2	PtuB,PtuA
10N.222.48.F8	112	CBASS	CBASS_I	1	2	2	2TM_5,AG_cyclase
10N.222.48.F8	6	dGTPase	dGTPase	17	17	1	Sp_dGTPase
10N.222.48.F8	22	AbiH	AbiH	241	241	1	AbiH
10N.222.49.A10	106	CBASS	CBASS_I	4	5	2	AG_cyclase,2TM_5
10N.222.49.A10	8	Dnd	Dnd_ABCDEFGH	88	97	7	DndB,DndC,DndD,DndE,DptH,DptG,DptF
10N.222.49.A10	22	Septu	Septu	128	129	2	PtuA,PtuB
10N.222.49.A10	50	Septu	Septu	43	44	2	PtuB,PtuA
10N.222.49.A10	59	Septu	Septu	38	39	2	PtuB,PtuA
10N.222.49.A10	1	dGTPase	dGTPase	371	371	1	Sp_dGTPase
10N.222.49.A10	16	AbiH	AbiH	4	4	1	AbiH
10N.222.49.A1	16	dGTPase	dGTPase	106	106	1	Sp_dGTPase
10N.222.49.A1	54	Dnd	Dnd_ABCDE	4	8	5	DndB,DndE,DndD,DndC,DndB
10N.222.49.A1	60	Cas	CAS_Class1-Subtype-I-F	1	4	4	TniQ_I-F_1,cas8f_I-F_2,cas7f_I-F_2,cas6f_I_II_III_IV_V_VI_2
10N.222.49.A1	70	RM	RM_Type_IV	39	40	2	Type_IV_REases,Type_IV_REases
10N.222.49.A1	88	RM	RM_Type_I	13	16	3	Type_I_MTases,Type_I_S,Type_I_REases
10N.222.49.A2	14	Shedu	Shedu	124	124	1	SduA
10N.222.49.A2	57	dGTPase	dGTPase	17	17	1	Sp_dGTPase
10N.222.49.A2	167	CBASS	CBASS_I	1	2	2	Effector_4TM_S_4TM,Cyclase_SMODS
10N.222.49.A2	45	SspBCDE	SspBCDE	79	82	4	SspD,SspC,SspB,SspE
10N.222.49.A3	20	Gao_Hhe	Gao_Hhe	9	9	1	HheA
10N.222.49.A3	27	Shedu	Shedu	74	74	1	SduA
10N.222.49.A3	52	dGTPase	dGTPase	61	61	1	Sp_dGTPase
10N.222.49.A3	262	Lamassu	Lamassu	9	10	2	LmuB,LmuA
10N.222.49.A3	59	Dsr	Dsr_I	14	14	1	Dsr1
10N.222.49.A3	105	Dsr	Dsr_I	2	3	2	Dsr1,Dsr1
10N.222.49.A3	127	DRT	DRT_3	1	2	2	drt3a,drt3b
10N.222.49.A3	222	Septu	Septu	5	6	2	PtuA,PtuB
10N.222.49.A3	367	Dsr	Dsr_I	1	1	1	Dsr1
10N.222.49.A3	171	CBASS	CBASS_I	1	2	2	AG_cyclase,2TM_5
10N.222.49.A3	16	RM	RM_Type_I	4	6	3	Type_I_MTases,Type_I_S,Type_I_REases
10N.222.49.A3	18	RM	RM_Type_IV	57	57	1	Type_IV_REases
10N.222.49.A3	34	RM	RM_Type_IV	74	74	1	Type_IV_REases
10N.222.49.A3	113	RM	RM_Type_IV	3	3	1	Type_IV_REases
10N.222.49.A3	221	RM	RM_Type_I	7	11	3	Type_I_REases,Type_I_S,Type_I_MTases
10N.222.49.A3	233	RM	RM_Type_I	1	3	3	Type_I_REases,Type_I_S,Type_I_MTases
10N.222.49.A4	13	CBASS	CBASS_I	4	5	2	AG_cyclase,2TM_5
10N.222.49.A4	40	Dnd	Dnd_ABCDE	16	19	4	DndB,DndC,DndD,DndE
10N.222.49.A4	24	Septu	Septu	11	12	2	PtuA,PtuB
10N.222.49.A4	55	Septu	Septu	51	52	2	PtuB,PtuA
10N.222.49.A4	89	Septu	Septu	12	13	2	PtuB,PtuA
10N.222.49.A4	21	dGTPase	dGTPase	28	28	1	Sp_dGTPase
10N.222.49.A4	248	AbiH	AbiH	4	4	1	AbiH
10N.222.49.A5	33	Lit	Lit	5	5	1	Lit
10N.222.49.A5	41	Viperin	Viperin	14	14	1	pVip
10N.222.49.A5	48	dGTPase	dGTPase	56	56	1	Sp_dGTPase
10N.222.49.A5	90	Wadjet	Wadjet_I	1	3	3	JetB_I,JetC_I,JetD_I
10N.222.49.A5	13	Cas	CAS_Class1-Subtype-I-F	6	9	4	cas6f_I_II_III_IV_V_VI_2,cas7f_I-F_2,cas8f_I-F_2,TniQ_I-F_1
10N.222.49.A5	76	Cas	CAS_Cluster	5	9	4	cas2_I_II_III_IV_V_VI_3,cas1_I_II_III_IV_V_VI_10,cas2_I_II_III_IV_V_VI_3,csx16_III_1
10N.222.49.A5	91	Cas	CAS_Class1-Subtype-III-D	1	8	7	csx1_III_10,cas6_I_II_III_IV_V_VI_17,csm3gr7_III-D_2,csx19_III-D_6,csx10gr5_III-D_4,csm3gr7_III-D_3,cas10_III-D_1
10N.222.49.A5	2	RM	RM_Type_II	15	16	2	Type_II_REases,Type_II_MTases
10N.222.49.A5	93	RM	RM_Type_I	17	21	3	Type_I_MTases,Type_I_S,Type_I_REases
10N.222.49.A7	4	Shedu	Shedu	18	18	1	SduA
10N.222.49.A7	37	dGTPase	dGTPase	15	15	1	Sp_dGTPase
10N.222.49.A7	81	Gao_Iet	Gao_Iet	2	3	2	IetA,IetS
10N.222.49.A7	28	Retron	Retron_I_A	79	81	3	HNH_TIGR02646,ATPase_TypeIA,RT_Tot
10N.222.49.A7	46	CBASS	CBASS_II	13	19	7	Effector_2TM_S_2TMBeta,Jab,AG_E1_ThiF,Cyclase_II,Sensing_SAVED,Cyclase_II,Sensing_SAVED
10N.222.49.A7	94	CBASS	CBASS_III	2	5	4	Endonuc_small,TRIP13,bacHORMA_1,Cyclase_II
10N.222.49.A7	1	RM	RM_Type_II	2	3	2	Type_II_MTases,Type_II_REases
10N.222.49.A7	4	RM	RM_Type_II	18	19	2	Type_II_REases,Type_II_MTases
10N.222.49.A7	33	RM	RM_Type_I	89	92	3	Type_I_MTases,Type_I_S,Type_I_REases
10N.222.49.A7	33	RM	RM_Type_IV	93	94	2	Type_IV_REases,Type_IV_REases
10N.222.49.A7	101	RM	RM_Type_IIG	4	4	1	Type_IIG
10N.222.49.A7	25	AVAST	AVAST_I	2	4	3	Avs1A,Avs1B,Avs1C
10N.222.49.A7	146	Septu	Septu	5	6	2	PtuB_2,PtuA
10N.222.49.A8	35	Dnd	Dnd_ABCDEFGH	42	51	7	DptF,DptG,DptH,DndE,DndD,DndC,DndB
10N.222.49.A8	39	Wadjet	Wadjet_I	1	3	3	JetB_I,JetC_I,JetD_I
10N.222.49.A8	12	Lit	Lit	136	136	1	Lit
10N.222.49.A8	48	dGTPase	dGTPase	60	60	1	Sp_dGTPase
10N.222.49.A8	76	Viperin	Viperin	6	6	1	pVip
10N.222.49.A8	21	Cas	CAS_Class1-Subtype-I-F	23	26	4	TniQ_I-F_1,cas8f_I-F_2,cas7f_I-F_2,cas6f_I_II_III_IV_V_VI_2
10N.222.49.A8	76	RM	RM_Type_I	13	17	3	Type_I_MTases,Type_I_S,Type_I_REases
10N.222.49.B10	8	CBASS	CBASS_I	256	257	2	Effector_2TM_S_2TMBeta,Cyclase_II
10N.222.49.B10	2	Rst_PARIS	PARIS_I	25	26	2	DUF4435,AAA_15
10N.222.49.B10	26	dGTPase	dGTPase	55	55	1	Sp_dGTPase
10N.222.49.B11	79	dGTPase	dGTPase	11	11	1	Sp_dGTPase
10N.222.49.B11	18	RM	RM_Type_IV	15	15	1	Type_IV_REases
10N.222.49.B11	47	RM	RM_Type_I	5	7	3	Type_I_REases,Type_I_S,Type_I_MTases
10N.222.49.B11	56	Wadjet	Wadjet_I	1	3	3	JetB_I,JetC_I,JetD_I
10N.222.49.B1	9	Gabija	Gabija	38	39	2	GajB_2,GajA
10N.222.49.B1	10	Viperin	Viperin	330	330	1	pVip
10N.222.49.B1	17	dGTPase	dGTPase	15	15	1	Sp_dGTPase
10N.222.49.B1	26	dCTPdeaminase	dCTPdeaminase	27	27	1	dCTPdeaminase
10N.222.49.B1	8	Dnd	Dnd_ABCDEFGH	55	64	7	DptF,DptG,DptH,DndE,DndD,DndC,DndB
10N.222.49.B1	1	RM	RM_Type_I	28	31	3	Type_I_REases,Type_I_MTases,Type_I_S
10N.222.49.B4	22	Cas	CAS_Class1-Subtype-I-F	29	32	4	TniQ_I-F_1,cas8f_I-F_2,cas7f_I-F_2,cas6f_I_II_III_IV_V_VI_2
10N.222.49.B4	7	RM	RM_Type_II	1	2	2	Type_II_REases,Type_II_MTases
10N.222.49.B4	22	RM	RM_Type_I	17	24	4	Type_I_REases,Type_I_REases,Type_I_MTases,Type_I_S
10N.222.49.B4	24	RM	RM_Type_I	59	62	3	Type_I_MTases,Type_I_S,Type_I_REases
10N.222.49.B4	51	RM	RM_Type_I	87	91	3	Type_I_MTases,Type_I_S,Type_I_REases
10N.222.49.B4	63	RM	RM_Type_IV	1	1	1	Type_IV_REases
10N.222.49.B4	63	RM	RM_Type_IIG	4	4	1	Type_IIG
10N.222.49.B4	20	Zorya	Zorya_TypeII	131	133	3	ZorE,ZorB,ZorA2	Vibrio tasmaniensis
10N.222.49.B4	24	Zorya	Zorya_TypeII	63	65	3	ZorA2,ZorB,ZorE	Vibrio tasmaniensis
10N.222.49.B4	51	Dnd	Dnd_ABCDEFGH	65	74	7	DptF,DptG,DptH,DndE,DndD,DndC,DndB
10N.222.49.B4	9	Septu	Septu	114	115	2	PtuA,PtuB
10N.222.49.B4	77	DRT	DRT_4	35	35	1	drt4
10N.222.49.B4	82	Retron	Retron_III	3	4	2	PRTase_WH,RT_Tot
10N.222.49.B4	27	dGTPase	dGTPase	98	98	1	Sp_dGTPase
10N.222.49.B4	65	Rst_3HP	Rst_3HP	11	13	3	Hp1,Hp2,Hp3
10N.222.49.B4	74	Gabija	Gabija	13	14	2	GajA,GajB_1
10N.222.49.B7	20	dGTPase	dGTPase	32	32	1	Sp_dGTPase
10N.222.49.B7	42	Kiwa	Kiwa	40	41	2	KwaA,KwaB_2
10N.222.49.B7	91	Lit	Lit	2	2	1	Lit
10N.222.49.B7	42	RM	RM_Type_I	37	39	3	Type_I_REases,Type_I_MTases,Type_I_S
10N.222.49.B7	111	RM	RM_Type_IV	14	14	1	Type_IV_REases
10N.222.49.B7	42	DarTG	DarTG	42	44	3	DarT,DarT,DarG
10N.222.49.B7	66	Wadjet	Wadjet_I	1	3	3	JetB_I,JetC_I,JetD_I
10N.222.49.B7	42	SspBCDE	SspBCDE	128	132	5	SspB,SspC,SspD,SspF,SspG
10N.222.49.B9	24	dCTPdeaminase	dCTPdeaminase	16	16	1	dCTPdeaminase
10N.222.49.B9	39	dGTPase	dGTPase	88	88	1	Sp_dGTPase
10N.222.49.B9	73	Gabija	Gabija	7	8	2	GajA,GajB_3
10N.222.49.B9	19	Rst_PARIS	PARIS_II_merge	5	5	1	AAA_21_DUF4435
10N.222.49.B9	73	CBASS	CBASS_II	11	14	4	Jab,AG_E1_ThiF,Cyclase_II,Phospholipase
10N.222.49.B9	97	RM	RM_Type_III	5	6	2	Type_III_REases,Type_III_MTases
10N.222.49.C10	1	RM	RM_Type_I	262	264	3	Type_I_S,Type_I_MTases,Type_I_REases
10N.222.49.C10	1	RM	RM_Type_IV	265	265	1	Type_IV_REases
10N.222.49.C10	17	RM	RM_Type_I	12	14	3	Type_I_MTases,Type_I_S,Type_I_REases
10N.222.49.C10	1	DarTG	DarTG	257	259	3	DarG,DarT,DarT
10N.222.49.C10	1	Kiwa	Kiwa	260	261	2	KwaB_2,KwaA
10N.222.49.C10	15	dGTPase	dGTPase	31	31	1	Sp_dGTPase
10N.222.49.C11	39	Kiwa	Kiwa	57	58	2	KwaB,KwaA
10N.222.49.C11	55	dGTPase	dGTPase	56	56	1	Sp_dGTPase
10N.222.49.C11	39	PrrC	PrrC	59	62	4	Type_I_REases,PrrC,Type_I_S,EcoprrI
10N.222.49.C11	16	DRT	DRT_2	84	84	1	drt2
10N.222.49.C11	5	Dnd	Dnd_ABCDE	3	7	5	DndB,DndE,DndD,DndC,DndB
10N.222.49.C12	37	Cas	CAS_Class1-Subtype-I-F	4	7	4	TniQ_I-F_1,cas8f_I-F_2,cas7f_I-F_2,cas6f_I_II_III_IV_V_VI_2
10N.222.49.C12	11	RM	RM_Type_I	4	7	3	Type_I_MTases,Type_I_S,Type_I_REases
10N.222.49.C12	12	RM	RM_Type_I	12	14	3	Type_I_REases,Type_I_S,Type_I_MTases
10N.222.49.C12	30	RM	RM_Type_I	67	70	3	Type_I_REases,Type_I_S,Type_I_MTases
10N.222.49.C12	48	RM	RM_Type_IV	54	54	1	Type_IV_REases
10N.222.49.C12	26	Nhi	Nhi	66	66	1	Nhi
10N.222.49.C12	60	dGTPase	dGTPase	16	16	1	Sp_dGTPase
10N.222.49.C1	7	Cas	CAS_Class1-Type-III	2	14	9	cas10_III-D_1,csm3gr7_III-D_3,csx10gr5_III-D_4,csx19_III-D_6,csm3gr7_III-D_2,cas6_I_II_III_IV_V_VI_17,cas1_I_II_III_IV_V_VI_10,cas2_I_II_III_IV_V_VI_3,WYL_I_II_III_IV_V_VI_4
10N.222.49.C1	47	RM	RM_Type_IV	22	22	1	Type_IV_REases
10N.222.49.C1	52	RM	RM_Type_IV	95	101	2	Type_IV_REases,Type_IV_REases
10N.222.49.C1	52	RM	RM_Type_I	96	98	3	Type_I_REases,Type_I_MTases,Type_I_S
10N.222.49.C1	52	Septu	Septu	99	100	2	PtuA,PtuB
10N.222.49.C1	52	CBASS	CBASS_I	89	90	2	AG_cyclase,2TM_5
10N.222.49.C1	49	dGTPase	dGTPase	18	18	1	Sp_dGTPase
10N.222.49.C1	65	Rst_3HP	Rst_3HP	21	23	3	Hp3,Hp2,Hp1
10N.222.49.C7	30	RM	RM_Type_I	23	27	4	Type_I_REases,Type_I_S,Type_I_MTases,Type_I_S
10N.222.49.C7	34	RM	RM_Type_II	107	108	2	Type_II_REases,Type_II_MTases
10N.222.49.C7	78	RM	RM_Type_IV	4	6	2	Type_IV_REases,Type_IV_REases
10N.222.49.C7	98	RM	RM_Type_I	6	9	3	Type_I_MTases,Type_I_S,Type_I_REases
10N.222.49.C7	101	RM	RM_Type_I	4	7	3	Type_I_REases,Type_I_S,Type_I_MTases
10N.222.49.C7	81	Septu	Septu	7	8	2	PtuA,PtuB
10N.222.49.C7	101	DarTG	DarTG	8	9	2	DarT,DarG
10N.222.49.C7	26	Retron	Retron_XII	16	16	1	RT_12
10N.222.49.C7	17	dGTPase	dGTPase	23	23	1	Sp_dGTPase
10N.222.49.C7	81	Gao_Tmn	Gao_Tmn	6	6	1	TmnA
10N.222.49.C7	101	Gabija	Gabija	1	2	2	GajB_2,GajA
10N.222.49.C8	10	dGTPase	dGTPase	33	33	1	Sp_dGTPase
10N.222.49.C8	5	Cas	CAS_Class1-Subtype-III-D	28	35	7	cas10_III-D_1,csm3gr7_III-D_3,csx10gr5_III-D_4,csx19_III-D_6,csm3gr7_III-D_2,cas6_I_II_III_IV_V_VI_17,csx1_III_10
10N.222.49.C8	49	Cas	CAS_Cluster	11	15	4	csx16_III_1,cas2_I_II_III_IV_V_VI_3,cas1_I_II_III_IV_V_VI_10,cas2_I_II_III_IV_V_VI_3
10N.222.49.C8	25	Retron	Retron_I_A	8	10	3	RT_Tot,ATPase_TypeIA,HNH_TIGR02646
10N.222.49.C8	19	RM	RM_Type_I	33	36	3	Type_I_MTases,Type_I_S,Type_I_REases
10N.222.49.C8	15	Wadjet	Wadjet_I	49	52	4	JetA_I,JetB_I,JetC_I,JetD_I
10N.222.49.C8	115	Wadjet	Wadjet_I	1	3	3	JetB_I,JetC_I,JetD_I
10N.222.49.C8	40	SspBCDE	SspBCDE	52	54	3	SspD,SspC,SspB
10N.222.49.C9	8	Gao_Ape	Gao_Ape	87	87	1	ApeA
10N.222.49.C9	9	dGTPase	dGTPase	37	37	1	Sp_dGTPase
10N.222.49.C9	17	Rst_DprA-PPRT	Rst_DprA-PPRT	82	83	2	DprA,Phosphoribosyltransferase
10N.222.49.C9	120	Viperin	Viperin	2	2	1	pVip
10N.222.49.C9	17	AVAST	AVAST_IV	85	85	1	Avs4A
10N.222.49.C9	27	CBASS	CBASS_I	9	10	2	Cyclase_II,Effector_4TM_S_4TM
10N.222.49.C9	8	Zorya	Zorya_TypeI	219	222	4	ZorA,ZorB,ZorC,ZorD
10N.222.49.C9	33	SspBCDE	SspBCDE	72	75	4	SspD,SspC,SspB,SspE
10N.222.49.C9	3	Cas	CAS_Class1-Subtype-I-F	204	207	4	cas6f_I_II_III_IV_V_VI_2,cas7f_I-F_2,cas8f_I-F_2,TniQ_I-F_1
10N.222.49.C9	8	RM	RM_Type_I	211	214	3	Type_I_MTases,Type_I_S,Type_I_REases
10N.222.49.C9	8	RM	RM_Type_IV	217	218	2	Type_IV_REases,Type_IV_REases
10N.222.49.C9	27	RM	RM_Type_I	3	8	4	Type_I_REases,Type_I_S,Type_I_MTases,Type_I_S
10N.222.49.E12	8	Cas	CAS_Class1-Subtype-I-F	173	176	4	TniQ_I-F_1,cas8f_I-F_2,cas7f_I-F_1,cas6f_I_II_III_IV_V_VI_1
10N.222.49.E12	8	RM	RM_Type_IV	153	153	1	Type_IV_REases
10N.222.49.E12	32	Septu	Septu	53	54	2	PtuA,PtuB
10N.222.49.E12	15	Gao_Ppl	Gao_Ppl	9	9	1	PplA
10N.222.49.E12	38	dGTPase	dGTPase	56	56	1	Sp_dGTPase
10N.222.49.E12	45	Lit	Lit	1	1	1	Lit
10N.222.49.E4	2	CBASS	CBASS_II	84	88	5	Phospholipase,Cyclase_II,AG_E1_ThiF,Jab,Effector_2TM_S_2TMBeta
10N.222.49.E4	90	CBASS	CBASS_II	28	31	4	Phospholipase,Cyclase_II,AG_E1_ThiF,Jab
10N.222.49.E4	1	SspBCDE	SspBCDE	21	24	4	SspD,SspC,SspB,SspE
10N.222.49.E4	258	Rst_PARIS	PARIS_II_merge	1	1	1	AAA_21_DUF4435
10N.222.49.E4	330	Rst_PARIS	PARIS_II_merge	1	1	1	AAA_21_DUF4435
10N.222.49.E4	2	Dsr	Dsr_I	69	69	1	Dsr1
10N.222.49.E4	2	Rst_DprA-PPRT	Rst_DprA-PPRT	75	76	2	Phosphoribosyltransferase,DprA
10N.222.49.E4	13	dGTPase	dGTPase	89	89	1	Sp_dGTPase
10N.222.49.E4	31	dCTPdeaminase	dCTPdeaminase	1	1	1	dCTPdeaminase
10N.222.49.E4	90	Gabija	Gabija	34	35	2	GajB_3,GajA
10N.222.49.E4	36	RM	RM_Type_II	4	5	2	Type_II_MTases,Type_II_REases
10N.222.49.E4	155	RM	RM_Type_III	5	6	2	Type_III_MTases,Type_III_REases
10N.222.49.E5	42	Dnd	Dnd_ABCDEFGH	96	105	7	DptF,DptG,DptH,DndE,DndD,DndC,DndB
10N.222.49.E5	20	CBASS	CBASS_I	1	2	2	2TM_5,AG_cyclase
10N.222.49.E5	1	dGTPase	dGTPase	368	368	1	Sp_dGTPase
10N.222.49.E5	3	AbiH	AbiH	4	4	1	AbiH
10N.222.49.E5	32	Septu	Septu	38	39	2	PtuB,PtuA
10N.222.49.E5	33	Septu	Septu	27	28	2	PtuA,PtuB
10N.222.49.E5	44	Septu	Septu	71	72	2	PtuB,PtuA
10N.222.49.E6	15	Wadjet	Wadjet_I	16	18	3	JetD_I,JetC_I,JetB_I
10N.222.49.E6	56	Septu	Septu	125	126	2	PtuB,PtuA
10N.222.49.E6	9	dGTPase	dGTPase	26	26	1	Sp_dGTPase
10N.222.49.E6	28	Cas	CAS_Class1-Subtype-I-F	5	8	4	cas6f_I_II_III_IV_V_VI_2,cas7f_I-F_2,cas8f_I-F_2,TniQ_I-F_1
10N.222.49.E6	28	RM	RM_Type_I	13	16	3	Type_I_S,Type_I_MTases,Type_I_REases
10N.222.49.E6	42	RM	RM_Type_II	15	16	2	Type_II_REases,Type_II_MTases
10N.222.49.E7	9	Shedu	Shedu	216	216	1	SduA
10N.222.49.E7	15	dCTPdeaminase	dCTPdeaminase	9	9	1	dCTPdeaminase
10N.222.49.E7	18	Gabija	Gabija	304	305	2	GajB_2,GajA
10N.222.49.E7	20	dGTPase	dGTPase	110	110	1	Sp_dGTPase
10N.222.49.E7	10	RM	RM_Type_I	26	30	5	Type_I_REases,Type_I_MTases,Type_I_MTases,Type_I_S,Type_I_REases
10N.222.49.E7	67	Dnd	Dnd_ABCDEFGH	7	16	7	DptF,DptG,DptH,DndE,DndD,DndC,DndB
10N.222.49.F1	19	Viperin	Viperin	20	20	1	pVip
10N.222.49.F1	192	dGTPase	dGTPase	5	5	1	Sp_dGTPase
10N.222.49.F1	127	Septu	Septu	28	29	2	PtuB,PtuA
10N.222.49.F1	111	Retron	Retron_VI	3	4	2	RT_Tot,HTH
10N.222.49.F1	205	Retron	Retron_I_A	3	5	3	HNH_TIGR02646,ATPase_TypeIA,RT_Tot
10N.222.49.F1	26	RM	RM_Type_I	50	56	3	Type_I_S,Type_I_MTases,Type_I_REases
10N.222.49.F1	75	RM	RM_Type_IIG	11	11	1	Type_IIG
10N.222.49.F1	127	RM	RM_Type_I	27	32	4	Type_I_REases,Type_I_S,Type_I_MTases,Type_I_S
10N.222.49.F1	134	RM	RM_Type_I	9	13	3	Type_I_MTases,Type_I_S,Type_I_REases
10N.222.49.F1	38	Zorya	Zorya_TypeII	6	8	3	ZorA2,ZorB,ZorE	Vibrio tasmaniensis
10N.222.49.F1	134	Zorya	Zorya_TypeI	14	17	4	ZorA,ZorB,ZorC,ZorD
10N.222.49.F1	134	Cas	CAS_Class1-Subtype-I-F	4	8	5	cas6f_I_II_III_IV_V_VI_1,cas7f_I-F_1,cas8f_I-F_2,TniQ_I-F_1,WYL_I_II_III_IV_V_VI_4
10N.222.49.F8	19	Rst_TIR-NLR	Rst_TIR-NLR	54	54	1	TIR
10N.222.49.F8	23	Lit	Lit	10	10	1	Lit
10N.222.49.F8	71	dGTPase	dGTPase	32	32	1	Sp_dGTPase
10N.222.49.F8	22	RM	RM_Type_II	129	130	2	Type_II_MTases,Type_II_REases
10N.222.49.F8	15	Wadjet	Wadjet_I	38	41	4	JetD_I,JetC_I,JetB_I,JetA_I
10N.222.49.F8	32	Wadjet	Wadjet_I	13	15	3	JetD_I,JetC_I,JetB_I
10N.222.49.F8	7	SspBCDE	SspBCDE	28	33	4	SspB,SspC,SspD,SspE
10N.222.51.A10	8	dGTPase	dGTPase	16	16	1	Sp_dGTPase
10N.222.51.A10	4	Cas	CAS_Class1-Subtype-III-D	31	46	11	cas10_III-D_1,csm3gr7_III-D_3,csx10gr5_III-D_4,csx19_III-D_6,csm3gr7_III-D_2,cas6_I_II_III_IV_V_VI_17,csx1_III_10,cas2_I_II_III_IV_V_VI_3,cas1_I_II_III_IV_V_VI_10,cas2_I_II_III_IV_V_VI_3,csx16_III_1
10N.222.51.A10	13	RM	RM_Type_I	36	39	3	Type_I_S,Type_I_MTases,Type_I_REases
10N.222.51.A10	50	RM	RM_Type_I	13	15	3	Type_I_MTases,Type_I_S,Type_I_REases
10N.222.51.A10	91	Wadjet	Wadjet_I	1	3	3	JetB_I,JetC_I,JetD_I
10N.222.51.A10	5	SspBCDE	SspBCDE	143	145	3	SspD,SspC,SspB
10N.222.51.A11	19	Thoeris	Thoeris_I	2	6	3	ThsB_Global,ThsB_Global,ThsA_new_grand
10N.222.51.A11	72	Rst_PARIS	PARIS_II	54	55	2	DUF4435,AAA_21
10N.222.51.A11	157	dGTPase	dGTPase	56	56	1	Sp_dGTPase
10N.222.51.A11	106	DRT	DRT_4	1	1	1	drt4
10N.222.51.A11	19	RM	RM_Type_I	7	11	3	Type_I_MTases,Type_I_S,Type_I_REases
10N.222.51.A11	51	RM	RM_Type_I	5	6	2	Type_I_REases,Type_I_MTases
10N.222.51.A11	65	RM	RM_Type_I	2	6	3	Type_I_REases,Type_I_S,Type_I_MTases
10N.222.51.A11	96	RM	RM_Type_I	18	22	3	Type_I_MTases,Type_I_S,Type_I_REases
10N.222.51.A11	165	RM	RM_Type_I	11	13	3	Type_I_REases,Type_I_S,Type_I_MTases
10N.222.51.A11	268	RM	RM_Type_I	6	10	4	Type_I_S,Type_I_MTases,Type_I_S,Type_I_REases
10N.222.51.A11	96	Cas	CAS_Class1-Subtype-I-F	13	17	5	cas6f_I_II_III_IV_V_VI_1,cas7f_I-F_1,cas8f_I-F_2,TniQ_I-F_1,WYL_I_II_III_IV_V_VI_4
10N.222.51.A12	5	dGTPase	dGTPase	28	28	1	Sp_dGTPase
10N.222.51.A12	13	SspBCDE	SspBCDE	54	56	3	SspD,SspC,SspB
10N.222.51.A12	25	Retron	Retron_VII_2	50	52	2	RT_Tot,DUF3800
10N.222.51.A12	2	RM	RM_Type_IV	15	15	1	Type_IV_REases
10N.222.51.A12	47	RM	RM_Type_I	22	25	3	Type_I_REases,Type_I_S,Type_I_MTases
10N.222.51.A12	21	Cas	CAS_Class1-Subtype-I-F	22	25	4	TniQ_I-F_1,cas8f_I-F_2,cas7f_I-F_2,cas6f_I_II_III_IV_V_VI_2
10N.222.51.A12	19	Wadjet	Wadjet_I	1	3	3	JetB_I,JetC_I,JetD_I
10N.222.51.A12	51	Wadjet	Wadjet_I	23	26	4	JetD_I,JetC_I,JetB_I,JetA_I
10N.222.51.A12	84	DRT	DRT_3	33	34	2	drt3b,drt3a
10N.222.51.A1	16	Cas	CAS_Class1-Subtype-I-F	5	8	4	TniQ_I-F_1,cas8f_I-F_2,cas7f_I-F_1,cas6f_I_II_III_IV_V_VI_1
10N.222.51.A1	50	RM	RM_Type_IV	30	31	2	Type_IV_REases,Type_IV_REases
10N.222.51.A1	74	RM	RM_Type_II	43	44	2	Type_II_MTases,Type_II_REases
10N.222.51.A1	76	Rst_PARIS	PARIS_II_merge	2	2	1	AAA_21_DUF4435
10N.222.51.A1	84	Septu	Septu	46	47	2	PtuA,PtuB
10N.222.51.A1	104	DRT	DRT_2	7	8	2	drt2,drt2
10N.222.51.A1	75	CBASS	CBASS_I	1	2	2	Cyclase_II,Effector_2TM_S_2TMBeta
10N.222.51.A1	87	dGTPase	dGTPase	16	16	1	Sp_dGTPase
10N.222.51.A2	22	dGTPase	dGTPase	18	18	1	Sp_dGTPase
10N.222.51.A2	29	AbiH	AbiH	4	4	1	AbiH
10N.222.51.A2	21	Septu	Septu	24	25	2	PtuA,PtuB
10N.222.51.A2	28	Septu	Septu	38	39	2	PtuB,PtuA
10N.222.51.A2	32	Septu	Septu	37	38	2	PtuB,PtuA
10N.222.51.A2	96	CBASS	CBASS_I	1	2	2	2TM_5,AG_cyclase
10N.222.51.A2	40	Dnd	Dnd_ABCDEFGH	96	105	7	DptF,DptG,DptH,DndE,DndD,DndC,DndB
10N.222.51.A4	28	Lamassu	Lamassu	14	15	2	LmuA,LmuB
10N.222.51.A4	53	Viperin	Viperin	49	49	1	pVip
10N.222.51.A4	80	dGTPase	dGTPase	11	11	1	Sp_dGTPase
10N.222.51.A4	39	AVAST	AVAST_II	9	9	1	Avs2A
10N.222.51.A4	63	Wadjet	Wadjet_I	1	4	4	JetA_I,JetB_I,JetC_I,JetD_I
10N.222.51.A4	53	RM	RM_Type_I	24	41	8	Type_I_REases,Type_I_S,Type_I_MTases,Type_I_S,Type_I_MTases,Type_I_S,Type_I_REases,Type_I_MTases
10N.222.51.A4	10	SspBCDE	SspBCDE	41	46	4	SspE,SspD,SspC,SspB
10N.222.51.A5	33	dGTPase	dGTPase	55	55	1	Sp_dGTPase
10N.222.51.A5	166	Gabija	Gabija	2	4	3	GajA,GajA,GajB_2
10N.222.51.A5	75	CBASS	CBASS_II	7	9	3	Cyclase_II,E2,2TM_new
10N.222.51.A5	78	RM	RM_Type_I	3	5	3	Type_I_REases,Type_I_S,Type_I_MTases
10N.222.51.A5	114	RM	RM_Type_I	3	7	3	Type_I_MTases,Type_I_S,Type_I_REases
10N.222.51.A5	114	RM	RM_Type_IV	5	5	1	Type_IV_REases
10N.222.51.A5	43	Septu	Septu	55	56	2	PtuB,PtuA
10N.222.51.A6	1169	Septu	Septu	1	2	2	PtuA,PtuB
10N.222.51.A6	1694	Septu	Septu	1	2	2	PtuB,PtuA
10N.222.51.A6	31	dGTPase	dGTPase	1	1	1	Sp_dGTPase
10N.222.51.A6	330	AbiH	AbiH	2	2	1	AbiH
10N.222.51.A7	44	CBASS	CBASS_II	10	13	4	Phospholipase,Cyclase_II,AG_E1_ThiF,Jab
10N.222.51.A7	87	CBASS	CBASS_I	92	93	2	2TM_5,AG_cyclase
10N.222.51.A7	18	Zorya	Zorya_TypeII	200	202	3	ZorE,ZorB,ZorA2	Vibrio tasmaniensis
10N.222.51.A7	11	Thoeris	Thoeris_I	2	6	3	ThsA_new_grand,ThsA_new_grand,ThsB_Global
10N.222.51.A7	53	Gao_Her	Gao_Her_DUF	25	26	2	DUF4297,HerA_DUF
10N.222.51.A7	210	Rst_PARIS	PARIS_II_merge	2	2	1	AAA_21_DUF4435
10N.222.51.A7	47	dGTPase	dGTPase	107	107	1	Sp_dGTPase
10N.222.51.A7	62	AbiH	AbiH	3	3	1	AbiH
10N.222.51.A7	128	Shedu	Shedu	1	1	1	SduA
10N.222.51.A7	142	Cas	CAS_Class1-Subtype-I-F	2	5	4	TniQ_I-F_1,cas8f_I-F_2,cas7f_I-F_2,cas6f_I_II_III_IV_V_VI_2
10N.222.51.A7	11	RM	RM_Type_I	1	4	3	Type_I_REases,Type_I_S,Type_I_MTases
10N.222.51.A7	15	RM	RM_Type_I	9	13	3	Type_I_REases,Type_I_S,Type_I_MTases
10N.222.51.A7	15	RM	RM_Type_IIG	29	29	1	Type_IIG
10N.222.51.A7	41	RM	RM_Type_II	14	16	3	Type_II_REases,Type_II_MTases,Type_II_REases
10N.222.51.A7	46	RM	RM_Type_II	27	28	2	Type_II_REases,Type_II_MTases
10N.222.51.A7	58	RM	RM_Type_I	101	103	3	Type_I_REases,Type_I_MTases,Type_I_S
10N.222.51.A7	69	RM	RM_Type_II	1	2	2	Type_II_REases,Type_II_MTases
10N.222.51.A7	96	RM	RM_Type_I	2	7	5	Type_I_REases,Type_I_REases,Type_I_S,Type_I_MTases,Type_I_REases
10N.222.51.B10	91	Cas	CAS_Class1-Subtype-I-F	21	24	4	TniQ_I-F_1,cas8f_I-F_2,cas7f_I-F_2,cas6f_I_II_III_IV_V_VI_2
10N.222.51.B10	6	RM	RM_Type_IV	91	91	1	Type_IV_REases
10N.222.51.B10	38	RM	RM_Type_I	32	38	5	Type_I_REases,Type_I_S,Type_I_MTases,Type_I_MTases,Type_I_S
10N.222.51.B10	36	SspBCDE	SspBCDE	7	9	3	SspB,SspC,SspD
10N.222.51.B10	38	Hachiman	Hachiman	30	31	2	HamB,HamA_1
10N.222.51.B10	9	Wadjet	Wadjet_I	1	3	3	JetB_I,JetC_I,JetD_I
10N.222.51.B10	31	Wadjet	Wadjet_I	24	27	4	JetD_I,JetC_I,JetB_I,JetA_I
10N.222.51.B10	68	DRT	DRT_3	33	34	2	drt3b,drt3a
10N.222.51.B10	41	Retron	Retron_VII_2	50	52	2	RT_Tot,DUF3800
10N.222.51.B10	75	dGTPase	dGTPase	53	53	1	Sp_dGTPase
10N.222.51.B11	43	Viperin	Viperin	28	28	1	pVip
10N.222.51.B11	48	dGTPase	dGTPase	19	19	1	Sp_dGTPase
10N.222.51.B11	35	RM	RM_Type_I	72	75	3	Type_I_REases,Type_I_S,Type_I_MTases
10N.222.51.B11	40	RM	RM_Type_II	5	6	2	Type_II_REases,Type_II_MTases
10N.222.51.B11	30	Wadjet	Wadjet_I	1	3	3	JetB_I,JetC_I,JetD_I
10N.222.51.B11	54	Septu	Septu	11	12	2	PtuB,PtuA
10N.222.51.B12	19	Rst_PARIS	PARIS_II_merge	84	84	1	AAA_21_DUF4435
10N.222.51.B12	7	AbiH	AbiH	82	82	1	AbiH
10N.222.51.B12	9	dGTPase	dGTPase	15	15	1	Sp_dGTPase
10N.222.51.B12	39	Rst_3HP	Rst_3HP	105	107	3	Hp3,Hp2,Hp1
10N.222.51.B12	7	CBASS	CBASS_II	100	105	5	Effector_2TM_S_2TMBeta,Jab,AG_E1_ThiF,Cyclase_II,Phospholipase
10N.222.51.B12	39	CBASS	CBASS_I	96	98	3	Cyclase_SMODS,2TM_new,4TM_new
10N.222.51.B12	27	RM	RM_Type_I	14	21	4	Type_I_S,Type_I_MTases,Type_I_REases,Type_I_REases
10N.222.51.B12	27	Cas	CAS_Class1-Subtype-I-F	6	9	4	cas6f_I_II_III_IV_V_VI_2,cas7f_I-F_2,cas8f_I-F_2,TniQ_I-F_1
10N.222.51.B2	31	Dnd	Dnd_ABCDEFGH	96	105	7	DptF,DptG,DptH,DndE,DndD,DndC,DndB
10N.222.51.B2	16	Septu	Septu	47	48	2	PtuA,PtuB
10N.222.51.B2	45	Septu	Septu	70	71	2	PtuB,PtuA
10N.222.51.B2	56	Septu	Septu	195	196	2	PtuB,PtuA
10N.222.51.B2	55	CBASS	CBASS_I	3	4	2	AG_cyclase,2TM_5
10N.222.51.B2	9	dGTPase	dGTPase	98	98	1	Sp_dGTPase
10N.222.51.B2	70	AbiH	AbiH	3	3	1	AbiH
10N.222.51.B4	40	CBASS	CBASS_II	124	129	5	Effector_2TM_S_2TMBeta,Jab,AG_E1_ThiF,Cyclase_II,Phospholipase
10N.222.51.B4	4	Dnd	Dnd_ABCDEFGH	184	192	8	DndB,DndC,DndD,DndE,DndB,DptH,DptG,DptF
10N.222.51.B4	40	Thoeris	Thoeris_I	95	101	3	ThsB_Global,ThsA_new_grand,ThsA_new_grand
10N.222.51.B4	7	DRT	DRT_2	186	186	1	drt2
10N.222.51.B4	26	Septu	Septu	8	9	2	PtuB,PtuA
10N.222.51.B4	40	Dsr	Dsr_I	101	101	1	Dsr1
10N.222.51.B4	76	Septu	Septu	2	3	2	PtuA,PtuB
10N.222.51.B4	11	dGTPase	dGTPase	20	20	1	Sp_dGTPase
10N.222.51.B7	31	RM	RM_Type_II	32	33	2	Type_II_REases,Type_II_MTases
10N.222.51.B7	41	RM	RM_Type_I	83	86	4	Type_I_REases,Type_I_S,Type_I_MTases,Type_I_MTases
10N.222.51.B7	46	Hachiman	Hachiman	3	4	2	HamB,HamA_1
10N.222.51.B7	60	Hachiman	Hachiman	29	31	3	HamB,HamA_2,HamA_2
10N.222.51.B7	41	DRT	DRT_2	82	82	1	drt2
10N.222.51.B7	46	Retron	Retron_XII	6	6	1	RT_12
10N.222.51.B7	2	Gao_Ppl	Gao_Ppl	14	14	1	PplA
10N.222.51.B7	8	dGTPase	dGTPase	89	89	1	Sp_dGTPase
10N.222.51.B8	15	RM	RM_Type_II	14	15	2	Type_II_REases,Type_II_MTases
10N.222.51.B8	60	RM	RM_Type_I	7	10	3	Type_I_MTases,Type_I_S,Type_I_REases
10N.222.51.B8	88	dGTPase	dGTPase	18	18	1	Sp_dGTPase
10N.222.51.B8	97	Viperin	Viperin	19	19	1	pVip
10N.222.51.B8	54	Wadjet	Wadjet_I	31	34	4	JetD_I,JetC_I,JetB_I,JetA_I
10N.222.51.B8	54	Wadjet	Wadjet_I	123	125	3	JetD_I,JetC_I,JetB_I
10N.222.51.C11	19	dGTPase	dGTPase	15	15	1	Sp_dGTPase
10N.222.51.C11	66	Viperin	Viperin	1	1	1	pVip
10N.222.51.C11	101	Gabija	Gabija	56	57	2	GajA,GajB_1
10N.222.51.C11	101	Hachiman	Hachiman	59	60	2	HamB,HamA_1
10N.222.51.C11	133	SspBCDE	SspBCDE	1	3	3	SspD,SspC,SspB
10N.222.51.C11	197	Zorya	Zorya_TypeII	6	8	3	ZorE,ZorB,ZorA2	Vibrio splendidus
10N.222.51.C11	71	Retron	Retron_II	30	31	2	RT_Tot,NDT
10N.222.51.C11	198	CBASS	CBASS_I	6	7	2	Cyclase_II,Effector_2TM_S_2TMBeta
10N.222.51.C11	71	RM	RM_Type_I	33	36	3	Type_I_REases,Type_I_S,Type_I_MTases
10N.222.51.C11	75	RM	RM_Type_I	2	8	4	Type_I_REases,Type_I_S,Type_I_MTases,Type_I_REases
10N.222.51.C11	91	RM	RM_Type_II	38	39	2	Type_II_MTases,Type_II_REases
10N.222.51.C11	52	Septu	Septu	74	75	2	PtuA,PtuB
10N.222.51.C11	162	DRT	DRT_3	3	4	2	drt3a,drt3b
10N.222.51.C12	22	RM	RM_Type_II	13	14	2	Type_II_MTases,Type_II_REases
10N.222.51.C12	47	CBASS	CBASS_II	1	4	4	Cyclase_II,AG_E1_ThiF,Jab,Sensing_SAVED
10N.222.51.C12	65	dGTPase	dGTPase	19	19	1	Sp_dGTPase
10N.222.51.C2	66	Dnd	Dnd_ABCDE	3	6	4	DndE,DndD,DndC,DndB
10N.222.51.C2	11	RM	RM_Type_II	5	6	2	Type_II_REases,Type_II_MTases
10N.222.51.C2	94	RM	RM_Type_I	2	7	3	Type_I_MTases,Type_I_REases,Type_I_REases
10N.222.51.C2	60	Cas	CAS_Class1-Subtype-I-F	15	18	4	cas6f_I_II_III_IV_V_VI_2,cas7f_I-F_2,cas8f_I-F_2,TniQ_I-F_1
10N.222.51.C2	16	dCTPdeaminase	dCTPdeaminase	157	157	1	dCTPdeaminase
10N.222.51.C2	32	dGTPase	dGTPase	54	54	1	Sp_dGTPase
10N.222.51.C2	99	Wadjet	Wadjet_I	3	5	5	JetA_I,JetA_I,JetD_I,JetC_I,JetB_I
10N.222.51.C4	72	dGTPase	dGTPase	25	25	1	Sp_dGTPase
10N.222.51.C4	23	Septu	Septu	67	68	2	PtuB,PtuA
10N.222.51.C4	48	Wadjet	Wadjet_I	1	3	3	JetB_I,JetC_I,JetD_I
10N.222.51.C4	91	AVAST	AVAST_II	1	1	1	Avs2A
10N.222.51.C4	5	Hachiman	Hachiman	234	235	2	HamB,HamA_1
10N.222.51.C4	50	Dnd	Dnd_ABCDEFGH	92	101	7	DptF,DptG,DptH,DndE,DndD,DndC,DndB
10N.222.51.C4	46	RM	RM_Type_II	130	131	2	Type_II_MTases,Type_II_REases
10N.222.51.C4	62	RM	RM_Type_I	69	72	3	Type_I_REases,Type_I_S,Type_I_MTases
10N.222.51.C5	5	Dnd	Dnd_ABCDEFGH	103	111	7	DndB,DndC,DndD,DndE,DptH,DptG,DptF
10N.222.51.C5	12	dGTPase	dGTPase	55	55	1	Sp_dGTPase
10N.222.51.C8	73	Gao_Ppl	Gao_Ppl	12	12	1	PplA
10N.222.51.C8	75	dGTPase	dGTPase	13	13	1	Sp_dGTPase
10N.222.51.C8	143	Gao_Ppl	Gao_Ppl	8	8	1	PplA
10N.222.51.C8	20	RM	RM_Type_IV	22	22	1	Type_IV_REases
10N.222.51.C8	22	RM	RM_Type_I	33	37	3	Type_I_MTases,Type_I_S,Type_I_REases
10N.222.51.C8	69	RM	RM_Type_I	16	19	3	Type_I_S,Type_I_MTases,Type_I_REases
10N.222.51.C8	108	RM	RM_Type_I	16	19	3	Type_I_MTases,Type_I_S,Type_I_REases
10N.222.51.C8	129	RM	RM_Type_IV	2	2	1	Type_IV_REases
10N.222.51.C8	129	RM	RM_Type_I	6	10	3	Type_I_REases,Type_I_S,Type_I_MTases
10N.222.51.C8	135	RM	RM_Type_IV	11	12	2	Type_IV_REases,Type_IV_REases
10N.222.51.C8	135	RM	RM_Type_I	15	18	3	Type_I_REases,Type_I_S,Type_I_MTases
10N.222.51.C8	135	Zorya	Zorya_TypeI	7	10	4	ZorD,ZorC,ZorB,ZorA
10N.222.51.C8	73	Cas	CAS_Class1-Subtype-I-F	16	19	4	cas6f_I_II_III_IV_V_VI_2,cas7f_I-F_2,cas8f_I-F_2,TniQ_I-F_1
10N.222.51.C8	127	Cas	CAS_Class1-Subtype-III-D	3	11	8	cas10_III-D_1,csm3gr7_III-D_3,csx10gr5_III-D_4,csx19_III-D_6,csm3gr7_III-D_2,cas6_I_II_III_IV_V_VI_17,cas1_I_II_III_IV_V_VI_10,cas2_I_II_III_IV_V_VI_3
10N.222.51.C8	129	Cas	CAS_Class1-Subtype-I-F	11	15	5	WYL_I_II_III_IV_V_VI_4,TniQ_I-F_1,cas8f_I-F_2,cas7f_I-F_1,cas6f_I_II_III_IV_V_VI_1
10N.222.51.E3	4	Lit	Lit	136	136	1	Lit
10N.222.51.E3	17	Gao_Hhe	Gao_Hhe	38	38	1	HheA
10N.222.51.E3	56	dGTPase	dGTPase	33	33	1	Sp_dGTPase
10N.222.51.E3	12	SspBCDE	SspBCDE	54	56	3	SspD,SspC,SspB
10N.222.51.E3	17	Druantia	Druantia_III	18	19	2	DruE_3,DruH
10N.222.51.E3	17	RM	RM_Type_I	9	11	3	Type_I_S,Type_I_MTases,Type_I_REases
10N.222.51.E3	17	RM	RM_Type_IV	20	21	2	Type_IV_REases,Type_IV_REases
10N.222.51.E3	17	RM	RM_Type_I	24	26	3	Type_I_S,Type_I_MTases,Type_I_REases
10N.222.51.E3	19	Wadjet	Wadjet_I	1	3	3	JetB_I,JetC_I,JetD_I
10N.222.51.E3	114	Wadjet	Wadjet_I	5	8	4	JetA_I,JetB_I,JetC_I,JetD_I
10N.222.51.E4	49	Wadjet	Wadjet_I	1	4	3	JetB_I,JetC_I,JetD_I
10N.222.51.E4	30	dGTPase	dGTPase	46	46	1	Sp_dGTPase
10N.222.51.E4	43	RM	RM_Type_II	6	7	2	Type_II_REases,Type_II_MTases
10N.222.51.E4	48	RM	RM_Type_IV	7	7	1	Type_IV_REases
10N.222.51.E5	8	dGTPase	dGTPase	222	222	1	Sp_dGTPase
10N.222.51.E5	18	Gabija	Gabija	5	6	2	GajA,GajB_3
10N.222.51.E5	3	Retron	Retron_I_A	17	19	3	HNH_TIGR02646,ATPase_TypeIA,RT_Tot
10N.222.51.E5	21	CBASS	CBASS_I	130	131	2	4TM_new,Cyclase_SMODS
10N.222.51.E5	27	Wadjet	Wadjet_I	15	18	4	JetA_I,JetB_I,JetC_I,JetD_I
10N.222.51.E5	37	Dnd	Dnd_ABCDE	2	5	4	DndE,DndD,DndC,DndB
10N.222.51.E6	15	dGTPase	dGTPase	97	97	1	Sp_dGTPase
10N.222.51.E6	14	Retron	Retron_VII_2	78	80	2	RT_Tot,DUF3800
10N.222.51.E6	6	RM	RM_Type_IV	119	119	1	Type_IV_REases
10N.222.51.E6	6	RM	RM_Type_I	126	130	3	Type_I_MTases,Type_I_S,Type_I_REases
10N.222.51.E6	6	RM	RM_Type_IV	131	131	1	Type_IV_REases
10N.222.51.E6	6	Septu	Septu	127	128	2	PtuB,PtuA
10N.222.51.E6	59	Wadjet	Wadjet_I	18	21	4	JetA_I,JetB_I,JetC_I,JetD_I
10N.222.51.E8	17	dGTPase	dGTPase	27	27	1	Sp_dGTPase
10N.222.51.E8	109	Gao_Upx	Gao_Upx	26	26	1	UpxA
10N.222.51.E8	19	RM	RM_Type_IIG	20	20	1	Type_IIG
10N.222.51.E8	75	Dnd	Dnd_ABCDEFGH	51	59	8	DptF,DptG,DptH,DndB,DndE,DndD,DndC,DndB
10N.222.51.F11	31	dGTPase	dGTPase	17	17	1	Sp_dGTPase
10N.222.51.F11	59	AbiH	AbiH	239	239	1	AbiH
10N.222.51.F11	28	Septu	Septu	195	196	2	PtuB,PtuA
10N.222.51.F11	54	Septu	Septu	3	4	2	PtuA,PtuB
10N.222.51.F11	55	Septu	Septu	38	39	2	PtuB,PtuA
10N.222.51.F11	157	CBASS	CBASS_I	3	4	2	AG_cyclase,2TM_5
10N.222.51.F11	8	Dnd	Dnd_ABCDEFGH	88	97	7	DndB,DndC,DndD,DndE,DptH,DptG,DptF
10N.222.51.F1	12	Dnd	Dnd_ABCDEFGH	220	229	7	DptF,DptG,DptH,DndE,DndD,DndC,DndB
10N.222.51.F1	7	Septu	Septu	24	25	2	PtuA,PtuB
10N.222.51.F1	10	Septu	Septu	27	28	2	PtuA,PtuB
10N.222.51.F1	23	Septu	Septu	50	51	2	PtuA,PtuB
10N.222.51.F1	87	CBASS	CBASS_I	4	5	2	AG_cyclase,2TM_5
10N.222.51.F1	1	dGTPase	dGTPase	97	97	1	Sp_dGTPase
10N.222.51.F1	5	AbiH	AbiH	249	249	1	AbiH
10N.222.51.F3	10	Dnd	Dnd_ABCDEFGH	219	228	7	DptF,DptG,DptH,DndE,DndD,DndC,DndB
10N.222.51.F3	86	CBASS	CBASS_I	4	5	2	AG_cyclase,2TM_5
10N.222.51.F3	7	AbiH	AbiH	201	201	1	AbiH
10N.222.51.F3	8	dGTPase	dGTPase	17	17	1	Sp_dGTPase
10N.222.51.F3	52	Septu	Septu	37	38	2	PtuB,PtuA
10N.222.51.F3	95	Septu	Septu	70	71	2	PtuB,PtuA
10N.222.51.F3	100	Septu	Septu	48	49	2	PtuA,PtuB
10N.222.51.F6	38	Cas	CAS_Class1-Subtype-I-F	42	45	4	cas6f_I_II_III_IV_V_VI_1,cas7f_I-F_1,cas8f_I-F_2,TniQ_I-F_1
10N.222.51.F6	3	dGTPase	dGTPase	108	108	1	Sp_dGTPase
10N.222.51.F6	1	Septu	Septu	165	166	2	PtuB,PtuA
10N.222.51.F8	61	Septu	Septu	2	3	2	PtuA,PtuB
10N.222.51.F8	10	Kiwa	Kiwa	26	27	2	KwaB,KwaA
10N.222.51.F8	17	Shedu	Shedu	2	2	1	SduA
10N.222.51.F8	27	dGTPase	dGTPase	42	42	1	Sp_dGTPase
10N.222.51.F8	21	Cas	CAS_Class1-Subtype-I-F	378	381	4	cas6f_I_II_III_IV_V_VI_2,cas7f_I-F_2,cas8f_I-F_2,TniQ_I-F_1
10N.222.51.F8	2	RM	RM_Type_IV	145	145	1	Type_IV_REases
10N.222.51.F8	2	RM	RM_Type_I	146	148	3	Type_I_MTases,Type_I_S,Type_I_REases
10N.222.51.F8	19	RM	RM_Type_II	29	34	3	Type_II_MTases,Type_II_MTases,Type_II_REases
10N.222.51.F8	27	RM	RM_Type_I	5	12	4	Type_I_S,Type_I_MTases,Type_I_REases,Type_I_REases
10N.222.51.F8	33	RM	RM_Type_I	11	14	3	Type_I_REases,Type_I_S,Type_I_MTases
10N.222.51.F9	16	Gabija	Gabija	198	200	3	GajA,GajB_1,GajB_2
10N.222.51.F9	19	dGTPase	dGTPase	88	88	1	Sp_dGTPase
10N.222.51.F9	23	Gao_Her	Gao_Her_DUF	97	98	2	HerA_DUF,DUF4297
10N.222.51.F9	26	RM	RM_Type_II	42	43	2	Type_II_REases,Type_II_MTases
10N.222.51.F9	45	DRT	DRT_2	62	62	1	drt2
10N.222.51.F9	5	Hachiman	Hachiman	288	289	2	HamA_1,HamB
10N.222.52.A12	100	Hachiman	Hachiman	10	11	2	HamB,HamA_1
10N.222.52.A12	11	Wadjet	Wadjet_I	10	12	3	JetD_I,JetC_I,JetB_I
10N.222.52.A12	27	Wadjet	Wadjet_I	4	7	4	JetA_I,JetB_I,JetC_I,JetD_I
10N.222.52.A12	29	Viperin	Viperin	30	30	1	pVip
10N.222.52.A12	42	dGTPase	dGTPase	27	27	1	Sp_dGTPase
10N.222.52.A12	70	Cas	CAS_Class1-Subtype-I-F	7	11	5	cas6f_I_II_III_IV_V_VI_1,cas7f_I-F_1,cas8f_I-F_2,TniQ_I-F_1,WYL_I_II_III_IV_V_VI_4
10N.222.52.A12	29	RM	RM_Type_I	21	24	3	Type_I_REases,Type_I_S,Type_I_MTases
10N.222.52.A12	51	RM	RM_Type_I	70	73	3	Type_I_S,Type_I_MTases,Type_I_REases
10N.222.52.A12	70	RM	RM_Type_I	12	16	3	Type_I_MTases,Type_I_S,Type_I_REases
10N.222.52.A1	33	SspBCDE	SspBCDE	7	9	3	SspB,SspC,SspD
10N.222.52.A1	43	Wadjet	Wadjet_I	1	3	3	JetB_I,JetC_I,JetD_I
10N.222.52.A1	67	dGTPase	dGTPase	37	37	1	Sp_dGTPase
10N.222.52.A1	6	Cas	CAS_Class1-Subtype-III-D	14	29	12	csx1_III_10,csx16_III_1,csx1_III_10,cas10_III-D_1,csm3gr7_III-D_3,csx10gr5_III-D_4,csx19_III-D_6,csm3gr7_III-D_2,cas6_I_II_III_IV_V_VI_17,cas2_I_II_III_IV_V_VI_13,cas1_I_II_III_IV_V_VI_10,cas2_I_II_III_IV_V_VI_13
10N.222.52.A1	61	Cas	CAS_Class1-Subtype-III-D	11	26	11	csx16_III_1,cas2_I_II_III_IV_V_VI_3,cas1_I_II_III_IV_V_VI_10,cas2_I_II_III_IV_V_VI_3,csx1_III_10,cas6_I_II_III_IV_V_VI_17,csm3gr7_III-D_2,csx19_III-D_6,csx10gr5_III-D_4,csm3gr7_III-D_3,cas10_III-D_1
10N.222.52.A1	8	RM	RM_Type_I	36	39	3	Type_I_S,Type_I_MTases,Type_I_REases
10N.222.52.A1	8	RM	RM_Type_IV	189	189	1	Type_IV_REases
10N.222.52.A1	57	RM	RM_Type_I	26	29	3	Type_I_REases,Type_I_S,Type_I_MTases
10N.222.52.A2	32	DRT	DRT_1	29	30	2	drt1a,drt1b
10N.222.52.A2	35	Gao_RL	Gao_RL	14	17	4	RL_A,RL_B,RL_C,RL_D
10N.222.52.A2	48	Wadjet	Wadjet_I	4	7	4	JetD_I,JetC_I,JetB_I,JetA_I
10N.222.52.A2	12	dGTPase	dGTPase	61	61	1	Sp_dGTPase
10N.222.52.A2	14	Gao_Ape	Gao_Ape	7	7	1	ApeA
10N.222.52.A2	32	Cas	CAS_Class1-Subtype-I-F	31	34	4	TniQ_I-F_1,cas8f_I-F_2,cas7f_I-F_2,cas6f_I_II_III_IV_V_VI_2
10N.222.52.A2	14	RM	RM_Type_I	9	13	3	Type_I_MTases,Type_I_S,Type_I_REases
10N.222.52.A2	32	RM	RM_Type_I	21	28	4	Type_I_REases,Type_I_REases,Type_I_MTases,Type_I_S
10N.222.52.A2	35	RM	RM_Type_IV	34	34	1	Type_IV_REases
10N.222.52.A3	3	dGTPase	dGTPase	28	28	1	Sp_dGTPase
10N.222.52.A3	1	Retron	Retron_I_A	306	308	3	HNH_TIGR02646,ATPase_TypeIA,RT_Tot
10N.222.52.A3	1	RM	RM_Type_I	464	467	3	Type_I_MTases,Type_I_S,Type_I_REases
10N.222.52.A3	1	RM	RM_Type_IV	468	469	2	Type_IV_REases,Type_IV_REases
10N.222.52.A3	22	RM	RM_Type_IV	29	29	1	Type_IV_REases
10N.222.52.A3	5	Septu	Septu	203	204	2	PtuB,PtuA
10N.222.52.A3	9	Dsr	Dsr_II	51	51	1	Dsr2
10N.222.52.A3	13	Septu	Septu	251	252	2	PtuB,PtuA
10N.222.52.A7	2	Shedu	Shedu	23	23	1	SduA
10N.222.52.A7	16	dGTPase	dGTPase	36	36	1	Sp_dGTPase
10N.222.52.A7	33	RM	RM_Type_II	90	91	2	Type_II_MTases,Type_II_REases
10N.222.52.B12	62	Gao_Upx	Gao_Upx	50	50	1	UpxA
10N.222.52.B12	70	dGTPase	dGTPase	37	37	1	Sp_dGTPase
10N.222.52.B12	58	RM	RM_Type_II	5	6	2	Type_II_MTases,Type_II_REases
10N.222.52.B12	75	RM	RM_Type_IV	10	10	1	Type_IV_REases
10N.222.52.B12	14	Septu	Septu	108	109	2	PtuA,PtuB
10N.222.52.B1	34	Gabija	Gabija	71	75	3	GajA,GajB_3,GajA
10N.222.52.B1	35	dGTPase	dGTPase	55	55	1	Sp_dGTPase
10N.222.52.B1	1	Hachiman	Hachiman	72	73	2	HamB,HamA_2
10N.222.52.B1	34	Retron	Retron_I_A	74	76	3	HNH_TIGR02646,ATPase_TypeIA,RT_Tot
10N.222.52.B1	34	Retron	Retron_VI	85	86	2	HTH,RT_Tot
10N.222.52.B1	7	RM	RM_Type_IV	202	203	2	Type_IV_REases,Type_IV_REases
10N.222.52.B1	7	RM	RM_Type_I	208	210	3	Type_I_S,Type_I_MTases,Type_I_REases
10N.222.52.B1	101	RM	RM_Type_IV	1	1	1	Type_IV_REases
10N.222.52.B2	42	dGTPase	dGTPase	67	67	1	Sp_dGTPase
10N.222.52.B2	4	Wadjet	Wadjet_I	124	127	4	JetD_I,JetC_I,JetB_I,JetA_I
10N.222.52.B2	17	Dnd	Dnd_ABCDE	2	5	4	DndE,DndD,DndC,DndB
10N.222.52.B4	6	Druantia	Druantia_III	21	22	2	DruH,DruE_3
10N.222.52.B4	6	RM	RM_Type_I	14	16	3	Type_I_REases,Type_I_MTases,Type_I_S
10N.222.52.B4	6	RM	RM_Type_IV	19	20	2	Type_IV_REases,Type_IV_REases
10N.222.52.B4	59	RM	RM_Type_I	14	16	3	Type_I_MTases,Type_I_S,Type_I_REases
10N.222.52.B4	70	RM	RM_Type_I	40	42	3	Type_I_S,Type_I_MTases,Type_I_REases
10N.222.52.B4	6	Gao_Hhe	Gao_Hhe	2	2	1	HheA
10N.222.52.B4	7	dCTPdeaminase	dCTPdeaminase	31	31	1	dCTPdeaminase
10N.222.52.B4	63	dGTPase	dGTPase	32	32	1	Sp_dGTPase
10N.222.52.B4	35	Wadjet	Wadjet_I	13	15	3	JetD_I,JetC_I,JetB_I
10N.222.52.B4	96	Wadjet	Wadjet_I	3	6	4	JetD_I,JetC_I,JetB_I,JetA_I
10N.222.52.B5	7	Viperin	Viperin	34	34	1	pVip
10N.222.52.B5	47	dGTPase	dGTPase	22	22	1	Sp_dGTPase
10N.222.52.B5	76	Septu	Septu	9	10	2	PtuA,PtuB
10N.222.52.B5	7	RM	RM_Type_I	25	29	3	Type_I_REases,Type_I_S,Type_I_MTases
10N.222.52.B5	114	RM	RM_Type_I	5	8	3	Type_I_MTases,Type_I_S,Type_I_REases
10N.222.52.B5	73	Dnd	Dnd_ABCDEFGH	24	33	7	DndB,DndC,DndD,DndE,DptH,DptG,DptF
10N.222.52.B7	30	dGTPase	dGTPase	55	55	1	Sp_dGTPase
10N.222.52.B7	32	Gabija	Gabija	83	84	2	GajA,GajB_3
10N.222.52.B7	68	RM	RM_Type_I	139	142	3	Type_I_MTases,Type_I_S,Type_I_REases
10N.222.52.B7	68	Dnd	Dnd_ABCDEFGH	116	125	7	DptF,DptG,DptH,DndE,DndD,DndC,DndB
10N.222.52.B7	82	Cas	CAS_Class1-Subtype-I-F	57	60	4	cas6f_I_II_III_IV_V_VI_2,cas7f_I-F_2,cas8f_I-F_2,TniQ_I-F_1
10N.222.52.B8	3	Lit	Lit	140	140	1	Lit
10N.222.52.B8	25	Gao_Hhe	Gao_Hhe	70	70	1	HheA
10N.222.52.B8	29	dGTPase	dGTPase	52	52	1	Sp_dGTPase
10N.222.52.B8	25	Druantia	Druantia_III	50	51	2	DruE_3,DruH
10N.222.52.B8	25	RM	RM_Type_I	41	43	3	Type_I_S,Type_I_MTases,Type_I_REases
10N.222.52.B8	25	RM	RM_Type_IV	52	53	2	Type_IV_REases,Type_IV_REases
10N.222.52.B8	25	RM	RM_Type_I	56	58	3	Type_I_S,Type_I_MTases,Type_I_REases
10N.222.52.B8	63	Wadjet	Wadjet_I	1	3	3	JetB_I,JetC_I,JetD_I
10N.222.52.B8	95	Wadjet	Wadjet_I	2	5	4	JetD_I,JetC_I,JetB_I,JetA_I
10N.222.52.B8	31	SspBCDE	SspBCDE	53	55	3	SspD,SspC,SspB
10N.222.52.B9	14	Rst_3HP	Rst_3HP	5	7	3	Hp1,Hp2,Hp3
10N.222.52.B9	46	Gabija	Gabija	10	11	2	GajA,GajB_3
10N.222.52.B9	102	Gabija	Gabija	7	8	2	GajB_2,GajA
10N.222.52.B9	105	dGTPase	dGTPase	12	12	1	Sp_dGTPase
10N.222.52.B9	102	Retron	Retron_III	5	6	2	RT_Tot,PRTase_WH
10N.222.52.B9	102	Retron	Retron_VI	16	17	2	HTH,RT_Tot
10N.222.52.B9	29	RM	RM_Type_I	2	6	4	Type_I_REases,Type_I_S,Type_I_MTases,Type_I_MTases
10N.222.52.B9	72	RM	RM_Type_IV	21	21	1	Type_IV_REases
10N.222.52.B9	109	Septu	Septu	5	6	2	PtuB,PtuA
10N.222.52.B9	144	Hachiman	Hachiman	2	1	3	HamB,HamA_1,HamB
10N.222.52.C10	11	SspBCDE	SspBCDE	7	9	3	SspB,SspC,SspD
10N.222.52.C10	8	dGTPase	dGTPase	56	56	1	Sp_dGTPase
10N.222.52.C10	22	Gao_Hhe	Gao_Hhe	12	12	1	HheA
10N.222.52.C10	23	Lit	Lit	143	143	1	Lit
10N.222.52.C10	22	RM	RM_Type_I	24	26	3	Type_I_REases,Type_I_MTases,Type_I_S
10N.222.52.C10	22	RM	RM_Type_IV	29	30	2	Type_IV_REases,Type_IV_REases
10N.222.52.C10	22	RM	RM_Type_I	39	41	3	Type_I_REases,Type_I_MTases,Type_I_S
10N.222.52.C10	22	Druantia	Druantia_III	31	32	2	DruH,DruE_3
10N.222.52.C10	21	Wadjet	Wadjet_I	79	81	3	JetD_I,JetC_I,JetB_I
10N.222.52.C10	43	Wadjet	Wadjet_I	2	5	4	JetD_I,JetC_I,JetB_I,JetA_I
10N.222.52.C11	39	Hachiman	Hachiman	10	11	2	HamA_2,HamB
10N.222.52.C11	59	dGTPase	dGTPase	18	18	1	Sp_dGTPase
10N.222.52.C12	49	dGTPase	dGTPase	3	3	1	Sp_dGTPase
10N.222.52.C12	113	Cas	CAS_Class1-Subtype-I-F	6	9	4	cas6f_I_II_III_IV_V_VI_2,cas7f_I-F_2,cas8f_I-F_2,TniQ_I-F_1
10N.222.52.C12	1	CBASS	CBASS_I	5	7	3	Sensing_SAVED,Cyclase_II,Sensing_SAVED
10N.222.52.C12	30	Retron	Retron_II	35	36	2	RT_Tot,NDT
10N.222.52.C12	179	CBASS	CBASS_II	1	4	4	Cyclase_II,AG_E1_ThiF,Jab,Effector_2TM_S_2TMBeta
10N.222.52.C12	67	RM	RM_Type_I	5	8	3	Type_I_MTases,Type_I_S,Type_I_REases
10N.222.52.C12	67	RM	RM_Type_IV	11	12	2	Type_IV_REases,Type_IV_REases
10N.222.52.C12	155	RM	RM_Type_I	9	11	3	Type_I_MTases,Type_I_S,Type_I_REases
10N.222.52.C1	13	Hachiman	Hachiman	40	41	2	HamA_2,HamB
10N.222.52.C1	32	Retron	Retron_VI	29	30	2	RT_Tot,HTH
10N.222.52.C1	32	Retron	Retron_I_A	40	42	3	RT_Tot,ATPase_TypeIA,HNH_TIGR02646
10N.222.52.C1	32	Gabija	Gabija	41	45	3	GajA,GajB_3,GajA
10N.222.52.C1	49	dGTPase	dGTPase	36	36	1	Sp_dGTPase
10N.222.52.C1	13	RM	RM_Type_I	221	223	3	Type_I_REases,Type_I_MTases,Type_I_S
10N.222.52.C1	13	RM	RM_Type_IV	228	229	2	Type_IV_REases,Type_IV_REases
10N.222.52.C1	23	RM	RM_Type_IV	23	23	1	Type_IV_REases
10N.222.52.C3	78	dGTPase	dGTPase	17	17	1	Sp_dGTPase
10N.222.52.C3	156	Rst_TIR-NLR	Rst_TIR-NLR	2	2	1	TIR
10N.222.52.C3	94	Retron	Retron_I_B	25	26	2	ATPase_TOPRIM_COG3593,RT_Tot
10N.222.52.C3	47	RM	RM_Type_I	66	70	5	Type_I_REases,Type_I_MTases,Type_I_MTases,Type_I_S,Type_I_REases
10N.222.52.C3	47	RM	RM_Type_IV	71	71	1	Type_IV_REases
10N.222.52.C3	66	RM	RM_Type_I	14	17	3	Type_I_MTases,Type_I_S,Type_I_REases
10N.222.52.C3	114	RM	RM_Type_IV	15	15	1	Type_IV_REases
10N.222.52.C3	114	RM	RM_Type_I	17	20	3	Type_I_REases,Type_I_MTases,Type_I_S
10N.222.52.C3	58	Septu	Septu	24	25	2	PtuB_2,PtuA
10N.222.52.F3	10	dGTPase	dGTPase	3	3	1	Sp_dGTPase
10N.222.52.F3	14	Gao_Ppl	Gao_Ppl	9	9	1	PplA
10N.222.52.F3	22	Kiwa	Kiwa	1	2	2	KwaB_2,KwaA
10N.222.52.F3	28	Gabija	Gabija	407	408	2	GajA,GajB_2
10N.222.52.F3	73	dGTPase	dGTPase	25	25	1	Sp_dGTPase
10N.222.52.F3	35	Hachiman	Hachiman	82	83	2	HamB,HamA_1
10N.222.52.F3	15	RM	RM_Type_III	18	19	2	Type_III_REases,Type_III_MTases
10N.222.52.F3	22	RM	RM_Type_I	3	8	4	Type_I_S,Type_I_MTases,Type_I_REases,Type_I_REases
10N.222.52.F3	28	RM	RM_Type_IV	234	235	2	Type_IV_REases,Type_IV_REases
10N.222.52.F3	28	RM	RM_Type_I	240	242	3	Type_I_S,Type_I_MTases,Type_I_REases
10N.222.52.F3	31	RM	RM_Type_I	3	5	3	Type_I_REases,Type_I_S,Type_I_MTases
10N.222.52.F3	40	RM	RM_Type_I	28	31	3	Type_I_MTases,Type_I_S,Type_I_REases
10N.222.52.F3	56	RM	RM_Type_I	12	15	4	Type_I_REases,Type_I_S,Type_I_MTases,Type_I_MTases
10N.222.52.F3	28	Septu	Septu	236	237	2	PtuB_2,PtuA
10N.222.54.A1	19	dCTPdeaminase	dCTPdeaminase	2	2	1	dCTPdeaminase
10N.222.54.A1	147	Gabija	Gabija	30	31	2	GajB_3,GajA
10N.222.54.A1	150	Gabija	Gabija	1	2	2	GajB_3,GajA
10N.222.54.A1	322	dGTPase	dGTPase	14	14	1	Sp_dGTPase
10N.222.54.A1	581	CBASS	CBASS_I	1	2	2	Cyclase_II,Phospholipase
10N.222.54.A1	277	Rst_PARIS	PARIS_II_merge	1	1	1	AAA_21_DUF4435
10N.222.54.A1	808	Rst_PARIS	PARIS_II_merge	2	2	1	AAA_21_DUF4435
10N.222.54.A1	88	RM	RM_Type_I	11	15	3	Type_I_REases,Type_I_S,Type_I_MTases
10N.222.54.A1	209	RM	RM_Type_I	9	13	4	Type_I_REases,Type_I_S,Type_I_MTases,Type_I_REases
10N.222.54.A1	209	Cas	CAS_Class1-Subtype-I-F	3	6	4	cas6f_I_II_III_IV_V_VI_2,cas7f_I-F_2,cas8f_I-F_2,TniQ_I-F_1
10N.222.54.A1	147	Septu	Septu	28	29	2	PtuB,PtuA
10N.222.54.A2	8	RM	RM_Type_I	26	28	3	Type_I_MTases,Type_I_S,Type_I_REases
10N.222.54.A2	6	Hachiman	Hachiman	12	13	2	HamB,HamA_1
10N.222.54.A2	27	SspBCDE	SspBCDE	21	24	4	SspD,SspC,SspB,SspE
10N.222.54.A2	1	DRT	DRT_3	5	6	2	drt3b,drt3a
10N.222.54.A2	7	Dsr	Dsr_I	8	8	1	Dsr1
10N.222.54.A2	11	AVAST	AVAST_IV	3	3	1	Avs4A
10N.222.54.A2	32	CBASS	CBASS_II	9	12	4	Jab,AG_E1_ThiF,Cyclase_II,Phospholipase
10N.222.54.A2	35	CBASS	CBASS_II	34	38	5	Effector_2TM_S_2TMBeta,Jab,AG_E1_ThiF,Cyclase_II,Phospholipase
10N.222.54.A2	7	Rst_DprA-PPRT	Rst_DprA-PPRT	1	2	2	DprA,Phosphoribosyltransferase
10N.222.54.A2	10	dGTPase	dGTPase	89	89	1	Sp_dGTPase
10N.222.54.A2	32	Gabija	Gabija	5	6	2	GajA,GajB_3
10N.222.54.A2	81	Shedu	Shedu	41	41	1	SduA
10N.222.54.A3	5	RM	RM_Type_III	1	2	2	Type_III_REases,Type_III_MTases
10N.222.54.A3	71	RM	RM_Type_I	9	12	3	Type_I_REases,Type_I_S,Type_I_MTases
10N.222.54.A3	163	CBASS	CBASS_I	6	7	2	Sensing_SAVED,Cyclase_II
10N.222.54.A3	74	dGTPase	dGTPase	50	50	1	Sp_dGTPase
10N.222.54.A6	2	dGTPase	dGTPase	158	158	1	Sp_dGTPase
10N.222.54.A6	15	Gabija	Gabija	22	23	2	GajB_3,GajA
10N.222.54.A6	19	Shedu	Shedu	32	32	1	SduA
10N.222.54.A6	24	Gabija	Gabija	12	13	2	GajA,GajB_2
10N.222.54.A6	69	Gabija	Gabija	49	50	2	GajB_3,GajA
10N.222.54.A6	146	Septu	Septu	3	4	2	PtuB_2,PtuA_2
10N.222.54.A6	1	CBASS	CBASS_I	4	5	2	Effector_2TM_S_2TMBeta,Cyclase_II
10N.222.54.A6	69	CBASS	CBASS_II	43	46	4	Phospholipase,Cyclase_II,AG_E1_ThiF,Jab
10N.222.54.A6	115	Retron	Retron_IV	8	9	2	2TM,RT_Tot
10N.222.54.A6	5	RM	RM_Type_I	192	195	3	Type_I_MTases,Type_I_S,Type_I_REases
10N.222.54.A6	5	RM	RM_Type_IV	198	199	2	Type_IV_REases,Type_IV_REases
10N.222.54.B11	82	dGTPase	dGTPase	15	15	1	Sp_dGTPase
10N.222.54.B11	27	Dsr	Dsr_I	6	6	1	Dsr1
10N.222.54.B11	280	Retron	Retron_II	1	2	2	RT_Tot,NDT
10N.222.54.B11	454	Retron	Retron_I_B	1	2	2	ATPase_TOPRIM_COG3593,RT_Tot
10N.222.54.B11	50	RM	RM_Type_I	23	27	4	Type_I_REases,Type_I_S,Type_I_MTases,Type_I_REases
10N.222.54.B11	119	RM	RM_Type_I	7	10	3	Type_I_REases,Type_I_S,Type_I_MTases
10N.222.54.B11	119	RM	RM_Type_IV	47	48	2	Type_IV_REases,Type_IV_REases
10N.222.54.B11	119	RM	RM_Type_I	49	51	3	Type_I_S,Type_I_MTases,Type_I_REases
10N.222.54.B11	50	Cas	CAS_Class1-Subtype-I-F	17	20	4	cas6f_I_II_III_IV_V_VI_2,cas7f_I-F_2,cas8f_I-F_2,TniQ_I-F_1
10N.222.54.B12	22	dGTPase	dGTPase	17	17	1	Sp_dGTPase
10N.222.54.B12	6	Druantia	Druantia_III	191	192	2	DruH,DruE_3
10N.222.54.B12	6	RM	RM_Type_I	187	189	3	Type_I_REases,Type_I_MTases,Type_I_S
10N.222.54.B12	6	RM	RM_Type_IV	194	195	2	Type_IV_REases,Type_IV_REases
10N.222.54.B12	26	RM	RM_Type_I	41	43	3	Type_I_MTases,Type_I_S,Type_I_REases
10N.222.54.B2	35	Retron	Retron_VI	77	78	2	RT_Tot,HTH
10N.222.54.B2	8	SspBCDE	SspBCDE	91	94	4	SspD,SspC,SspB,SspE
10N.222.54.B2	35	Hachiman	Hachiman	74	75	2	HamA_1,HamB
10N.222.54.B2	92	Septu	Septu	10	11	2	PtuB,PtuA
10N.222.54.B2	12	dGTPase	dGTPase	16	16	1	Sp_dGTPase
10N.222.54.B2	112	Gao_Iet	Gao_Iet	2	3	2	IetA,IetS
10N.222.54.B2	43	Cas	CAS_Class1-Subtype-I-F	33	36	4	TniQ_I-F_1,cas8f_I-F_2,cas7f_I-F_2,cas6f_I_II_III_IV_V_VI_2
10N.222.54.B2	24	RM	RM_Type_I	76	80	3	Type_I_MTases,Type_I_S,Type_I_REases
10N.222.54.B6	30	dGTPase	dGTPase	17	17	1	Sp_dGTPase
10N.222.54.B6	48	Zorya	Zorya_TypeI	91	94	4	ZorA,ZorB,ZorC,ZorD
10N.222.54.B6	48	RM	RM_Type_I	83	86	3	Type_I_MTases,Type_I_S,Type_I_REases
10N.222.54.B6	48	RM	RM_Type_IV	89	90	2	Type_IV_REases,Type_IV_REases
10N.222.54.B6	55	RM	RM_Type_IV	22	22	1	Type_IV_REases
10N.222.54.B6	81	Cas	CAS_Class1-Type-III	2	14	9	cas10_III-D_1,csm3gr7_III-D_3,csx10gr5_III-D_4,csx19_III-D_6,csm3gr7_III-D_2,cas6_I_II_III_IV_V_VI_17,cas1_I_II_III_IV_V_VI_10,cas2_I_II_III_IV_V_VI_3,WYL_I_II_III_IV_V_VI_4
10N.222.54.B8	69	dGTPase	dGTPase	37	37	1	Sp_dGTPase
10N.222.54.B8	45	DRT	DRT_4	8	8	1	drt4
10N.222.54.B8	14	RM	RM_Type_IV	2	2	1	Type_IV_REases
10N.222.54.B8	28	RM	RM_Type_I	13	16	3	Type_I_S,Type_I_MTases,Type_I_REases
10N.222.54.B8	28	RM	RM_Type_IV	19	19	1	Type_IV_REases
10N.222.54.C1	23	Rst_PARIS	PARIS_II_merge	3	3	1	AAA_21_DUF4435
10N.222.54.C1	25	dGTPase	dGTPase	161	161	1	Sp_dGTPase
10N.222.54.C1	38	dCTPdeaminase	dCTPdeaminase	176	176	1	dCTPdeaminase
10N.222.54.C1	41	Gabija	Gabija	6	7	2	GajA,GajB_3
10N.222.54.C1	63	Gabija	Gabija	3	4	2	GajB_3,GajA
10N.222.54.C1	63	Septu	Septu	1	2	2	PtuB,PtuA
10N.222.54.C1	41	CBASS	CBASS_II	10	13	4	Jab,AG_E1_ThiF,Cyclase_II,Phospholipase
10N.222.54.C1	39	RM	RM_Type_I	11	15	3	Type_I_REases,Type_I_S,Type_I_MTases
10N.222.54.C1	78	RM	RM_Type_I	7	9	3	Type_I_REases,Type_I_S,Type_I_MTases
10N.222.54.C1	78	Cas	CAS_Class1-Subtype-I-F	2	4	3	cas7f_I-F_2,cas8f_I-F_2,TniQ_I-F_1
10N.222.54.C2	55	dGTPase	dGTPase	89	89	1	Sp_dGTPase
10N.222.54.C2	43	Dnd	Dnd_ABCDEFGH	72	79	7	DptF,DptG,DptH,DndE,DndD,DndC,DndB
10N.222.54.C2	25	RM	RM_Type_IV	1	2	2	Type_IV_REases,Type_IV_REases
10N.222.54.C2	25	RM	RM_Type_I	5	8	3	Type_I_REases,Type_I_S,Type_I_MTases
10N.222.54.C3	4	Retron	Retron_XII	56	56	1	RT_12
10N.222.54.C3	7	CBASS	CBASS_II	39	42	4	Phospholipase,Cyclase_II,AG_E1_ThiF,Jab
10N.222.54.C3	33	CBASS	CBASS_I	80	81	2	Cyclase_II,Effector_2TM_S_2TMBeta
10N.222.54.C3	41	CBASS	CBASS_II	11	14	4	Jab,AG_E1_ThiF,Cyclase_II,Phospholipase
10N.222.54.C3	46	Retron	Retron_I_A	9	14	3	RT_Tot,PtuB,PtuA
10N.222.54.C3	76	CBASS	CBASS_I	25	26	2	Effector_4TM_S_4TM,Cyclase_II
10N.222.54.C3	76	Septu	Septu	30	31	2	PtuA,PtuB
10N.222.54.C3	36	dGTPase	dGTPase	91	91	1	Sp_dGTPase
10N.222.54.C3	41	Gabija	Gabija	7	8	2	GajA,GajB_3
10N.222.54.C3	58	Gabija	Gabija	22	23	2	GajB_3,GajA
10N.222.54.C3	73	Gabija	Gabija	26	27	2	GajA,GajB_2
10N.222.54.C3	29	RM	RM_Type_I	125	128	3	Type_I_MTases,Type_I_S,Type_I_REases
10N.222.54.C3	29	RM	RM_Type_IV	131	132	2	Type_IV_REases,Type_IV_REases
10N.222.54.C3	50	RM	RM_Type_I	41	44	3	Type_I_REases,Type_I_S,Type_I_MTases
10N.222.54.C3	76	RM	RM_Type_I	27	32	4	Type_I_S,Type_I_MTases,Type_I_S,Type_I_REases
10N.222.54.C7	3	RM	RM_Type_IIG	33	33	1	Type_IIG
10N.222.54.C7	6	RM	RM_Type_II	96	97	2	Type_II_MTases,Type_II_REases
10N.222.54.C7	45	RM	RM_Type_I	66	71	3	Type_I_MTases,Type_I_S,Type_I_REases
10N.222.54.C7	59	RM	RM_Type_IIG	1	1	1	Type_IIG
10N.222.54.C7	2	Gabija	Gabija	248	249	2	GajB_3,GajA
10N.222.54.C7	24	dGTPase	dGTPase	15	15	1	Sp_dGTPase
10N.222.54.C8	46	dGTPase	dGTPase	42	42	1	Sp_dGTPase
10N.222.54.C8	357	Gao_Her	Gao_Her_DUF	1	1	2	HerA_DUF,DUF4297
10N.222.54.C8	11	DRT	DRT_2	10	10	1	drt2
10N.222.54.C8	89	RM	RM_Type_II	24	25	2	Type_II_REases,Type_II_MTases
10N.222.54.C8	97	RM	RM_Type_II	34	35	2	Type_II_MTases,Type_II_REases
10N.222.54.E4	9	Rst_PARIS	PARIS_I	172	173	2	DUF4435,AAA_15
10N.222.54.E4	4	Lamassu	Lamassu	219	220	2	LmuB,LmuA
10N.222.54.E4	5	Nhi	Nhi	1	1	1	Nhi
10N.222.54.E4	9	dGTPase	dGTPase	87	87	1	Sp_dGTPase
10N.222.54.E4	4	Retron	Retron_I_A	203	205	3	PtuB,ATPase_TypeIA,RT_Tot
10N.222.54.E4	1	RM	RM_Type_II	243	244	2	Type_II_REases,Type_II_MTases
10N.222.54.E4	9	RM	RM_Type_III	641	642	2	Type_III_MTases,Type_III_REases
10N.222.54.E6	10	dGTPase	dGTPase	302	302	1	Sp_dGTPase
10N.222.54.E6	28	AbiH	AbiH	251	251	1	AbiH
10N.222.54.E6	3	Septu	Septu	50	51	2	PtuA,PtuB
10N.222.54.E6	6	Septu	Septu	195	196	2	PtuB,PtuA
10N.222.54.E6	38	Septu	Septu	51	52	2	PtuB,PtuA
10N.222.54.E6	13	CBASS	CBASS_I	1	2	2	2TM_5,AG_cyclase
10N.222.54.E6	13	Dnd	Dnd_ABCDEFGH	225	234	7	DptF,DptG,DptH,DndE,DndD,DndC,DndB
10N.222.54.E7	7	dGTPase	dGTPase	369	369	1	Sp_dGTPase
10N.222.54.E7	14	Dnd	Dnd_ABCDEFGH	83	91	8	DndB,DndC,DndD,DndE,DndB,DptH,DptG,DptF
10N.222.54.E7	26	CBASS	CBASS_I	5	6	2	2TM_Gros,Cyclase_SMODS
10N.222.54.E8	7	Gabija	Gabija	160	161	2	GajB_3,GajA
10N.222.54.E8	10	dGTPase	dGTPase	16	16	1	Sp_dGTPase
10N.222.54.E8	21	Gabija	Gabija	11	12	2	GajB_2,GajA
10N.222.54.E8	39	Gabija	Gabija	5	6	2	GajA,GajB_3
10N.222.54.E8	39	CBASS	CBASS_II	9	12	4	Jab,AG_E1_ThiF,Cyclase_II,Phospholipase
10N.222.54.E8	40	CBASS	CBASS_I	4	5	2	Cyclase_II,Effector_2TM_S_2TMBeta
10N.222.54.E8	87	BREX	BREX_I	6	14	6	brxL,pglZA,pglX1,brxC,brxB_DUF1788,brxA_DUF1819
10N.222.54.E8	4	RM	RM_Type_II	27	34	3	Type_II_MTases,Type_II_MTases,Type_II_REases
10N.222.54.E8	17	RM	RM_Type_I	191	194	3	Type_I_MTases,Type_I_S,Type_I_REases
10N.222.54.E8	17	RM	RM_Type_IV	197	198	2	Type_IV_REases,Type_IV_REases
10N.222.54.E8	15	Dsr	Dsr_II	1	1	1	Dsr2
10N.222.54.F10	47	Cas	CAS_Class1-Type-III	61	73	9	WYL_I_II_III_IV_V_VI_4,cas2_I_II_III_IV_V_VI_3,cas1_I_II_III_IV_V_VI_10,cas6_I_II_III_IV_V_VI_17,csm3gr7_III-D_2,csx19_III-D_6,csx10gr5_III-D_4,csm3gr7_III-D_3,cas10_III-D_1
10N.222.54.F10	26	RM	RM_Type_I	83	86	3	Type_I_MTases,Type_I_S,Type_I_REases
10N.222.54.F10	26	RM	RM_Type_IV	89	90	2	Type_IV_REases,Type_IV_REases
10N.222.54.F10	62	RM	RM_Type_IV	85	85	1	Type_IV_REases
10N.222.54.F10	26	Zorya	Zorya_TypeI	91	94	4	ZorA,ZorB,ZorC,ZorD
10N.222.54.F10	21	dGTPase	dGTPase	36	36	1	Sp_dGTPase
10N.222.54.F11	20	RM	RM_Type_IV	61	61	1	Type_IV_REases
10N.222.54.F11	10	Dnd	Dnd_ABCDEFGH	139	148	8	DndB,DndC,DndD,DndE,DndB,DptH,DptG,DptF
10N.222.54.F11	20	DRT	DRT_2	75	75	1	drt2
10N.222.54.F11	3	Retron	Retron_I_B	99	100	2	ATPase_TOPRIM_COG3593,RT_Tot
10N.222.54.F11	20	dGTPase	dGTPase	56	56	1	Sp_dGTPase
10N.222.54.F12	27	dGTPase	dGTPase	96	96	1	Sp_dGTPase
10N.222.54.F12	69	Gabija	Gabija	27	28	2	GajA,GajB_1
10N.222.54.F12	17	Rst_PARIS	PARIS_II	1	2	2	AAA_21,DUF4435
10N.222.54.F12	73	Rst_PARIS	PARIS_II_merge	2	2	1	AAA_21_DUF4435
10N.222.54.F12	32	RM	RM_Type_II	44	45	2	Type_II_MTases,Type_II_REases
10N.222.54.F12	35	RM	RM_Type_I	13	18	4	Type_I_REases,Type_I_MTases,Type_I_S,Type_I_REases
10N.222.54.F12	36	RM	RM_Type_I	41	45	3	Type_I_MTases,Type_I_S,Type_I_REases
10N.222.54.F12	44	RM	RM_Type_I	22	24	3	Type_I_REases,Type_I_S,Type_I_MTases
10N.222.54.F12	64	RM	RM_Type_IIG	7	7	1	Type_IIG
10N.222.54.F12	72	RM	RM_Type_I	9	11	3	Type_I_MTases,Type_I_S,Type_I_REases
10N.222.54.F12	35	Cas	CAS_Class1-Subtype-I-F	21	24	4	TniQ_I-F_1,cas8f_I-F_2,cas7f_I-F_2,cas6f_I_II_III_IV_V_VI_2
10N.222.54.F12	35	Septu	Septu	19	20	2	PtuA_2,PtuB_2
10N.222.54.F12	52	Septu	Septu	50	51	2	PtuB,PtuA
10N.222.54.F5	6	dGTPase	dGTPase	7	7	1	Sp_dGTPase
10N.222.54.F5	66	Lit	Lit	5	5	1	Lit
10N.222.54.F5	4	SspBCDE	SspBCDE	44	46	3	SspD,SspC,SspB
10N.222.54.F5	38	Druantia	Druantia_III	19	20	2	DruE_3,DruH
10N.222.54.F5	21	RM	RM_Type_I	2	4	3	Type_I_REases,Type_I_S,Type_I_MTases
10N.222.54.F5	23	RM	RM_Type_II	9	13	3	Type_II_MTases,Type_II_REases,Type_II_MTases
10N.222.54.F5	38	RM	RM_Type_I	21	23	3	Type_I_S,Type_I_MTases,Type_I_REases
10N.222.54.F5	38	Cas	CAS_Class1-Subtype-I-F	25	28	4	TniQ_I-F_1,cas8f_I-F_2,cas7f_I-F_1,cas6f_I_II_III_IV_V_VI_1
10N.222.54.F5	65	Cas	CAS_Class1-Subtype-III-D	4	11	7	csx1_III_10,cas6_I_II_III_IV_V_VI_17,csm3gr7_III-D_2,csx19_III-D_6,csx10gr5_III-D_4,csm3gr7_III-D_3,cas10_III-D_1
10N.222.54.F5	105	Cas	CAS_Cluster	11	15	4	csx16_III_1,cas2_I_II_III_IV_V_VI_3,cas1_I_II_III_IV_V_VI_10,cas2_I_II_III_IV_V_VI_3
10N.222.54.F6	15	dGTPase	dGTPase	42	42	1	Sp_dGTPase
10N.222.54.F6	16	RM	RM_Type_III	30	31	2	Type_III_REases,Type_III_MTases
10N.222.54.F6	83	RM	RM_Type_IIG	83	83	1	Type_IIG
10N.222.54.F6	109	RM	RM_Type_I	12	15	3	Type_I_MTases,Type_I_S,Type_I_REases
10N.222.54.F6	111	RM	RM_Type_I	16	19	3	Type_I_S,Type_I_MTases,Type_I_REases
10N.222.54.F6	111	RM	RM_Type_IV	21	21	1	Type_IV_REases
10N.222.54.F7	7	Kiwa	Kiwa	87	88	2	KwaA,KwaB
10N.222.54.F7	16	dGTPase	dGTPase	87	87	1	Sp_dGTPase
10N.222.54.F7	3	DRT	DRT_3	3	4	2	drt3b,drt3a
10N.222.54.F7	7	Septu	Septu	101	102	2	PtuA,PtuB_2
10N.222.54.F7	47	CBASS	CBASS_II	60	63	4	Cyclase_II,Cyclase_II,E2,2TM_new
10N.222.54.F7	11	RM	RM_Type_I	29	33	3	Type_I_MTases,Type_I_S,Type_I_REases
10N.222.54.F7	11	RM	RM_Type_IV	34	34	1	Type_IV_REases
10N.222.54.F7	4	Zorya	Zorya_TypeII	71	73	3	ZorE,ZorB,ZorA2	Vibrio splendidus
10N.222.54.F7	15	Zorya	Zorya_TypeI	250	253	4	ZorD,ZorC,ZorB,ZorA
10N.222.55.A11	48	dGTPase	dGTPase	17	17	1	Sp_dGTPase
10N.222.55.A11	71	Zorya	Zorya_TypeI	91	94	4	ZorA,ZorB,ZorC,ZorD
10N.222.55.A11	7	CBASS	CBASS_II	25	31	7	Sensing_SAVED,Cyclase_II,Sensing_SAVED,Cyclase_II,AG_E1_ThiF,Jab,Effector_2TM_S_2TMBeta
10N.222.55.A11	44	Gao_Qat	Gao_Qat	28	31	4	QatA,QatB,QatC,QatD
10N.222.55.A11	37	RM	RM_Type_IV	54	54	1	Type_IV_REases
10N.222.55.A11	71	RM	RM_Type_I	83	86	3	Type_I_MTases,Type_I_S,Type_I_REases
10N.222.55.A11	71	RM	RM_Type_IV	89	90	2	Type_IV_REases,Type_IV_REases
10N.222.55.A1	21	Zorya	Zorya_TypeI	5	8	4	ZorA,ZorB,ZorC,ZorD
10N.222.55.A1	25	Dnd	Dnd_ABCDEFGH	15	25	9	DndA,DndB,DndC,DndD,DndE,DndB,DptH,DptG,DptF
10N.222.55.A1	91	Retron	Retron_I_B	1	2	2	ATPase_TOPRIM_COG3593,RT_Tot
10N.222.55.A1	21	RM	RM_Type_IV	3	4	2	Type_IV_REases,Type_IV_REases
10N.222.55.A1	25	RM	RM_Type_IV	14	14	1	Type_IV_REases
10N.222.55.A1	26	RM	RM_Type_I	95	98	3	Type_I_MTases,Type_I_S,Type_I_REases
10N.222.55.A1	37	RM	RM_Type_IV	55	55	1	Type_IV_REases
10N.222.55.A1	26	RADAR	radar_I	100	101	2	rdrA_I,rdrB_I
10N.222.55.A1	52	dGTPase	dGTPase	52	52	1	Sp_dGTPase
10N.222.55.A1	140	Viperin	Viperin	1	1	1	pVip
10N.222.55.A1	65	Septu	Septu	2	3	2	PtuB,PtuA
10N.222.55.A2	2	Zorya	Zorya_TypeI	91	94	4	ZorA,ZorB,ZorC,ZorD
10N.222.55.A2	11	Gabija	Gabija	52	53	2	GajB_2,GajA
10N.222.55.A2	36	dGTPase	dGTPase	17	17	1	Sp_dGTPase
10N.222.55.A2	17	Cas	CAS_Class1-Type-III	47	9	9	WYL_I_II_III_IV_V_VI_4,cas2_I_II_III_IV_V_VI_3,cas1_I_II_III_IV_V_VI_1,cas6_I_II_III_IV_V_VI_17,csm3gr7_III-D_2,csx19_III-D_6,csx10gr5_III-D_4,csm3gr7_III-D_3,cas10_III-D_1
10N.222.55.A2	2	RM	RM_Type_I	83	86	3	Type_I_MTases,Type_I_S,Type_I_REases
10N.222.55.A2	2	RM	RM_Type_IV	89	90	2	Type_IV_REases,Type_IV_REases
10N.222.55.A2	11	RM	RM_Type_I	54	56	3	Type_I_MTases,Type_I_S,Type_I_REases
10N.222.55.A2	39	RM	RM_Type_IV	55	55	1	Type_IV_REases
10N.222.55.A2	55	RM	RM_Type_I	6	9	3	Type_I_REases,Type_I_S,Type_I_MTases
10N.222.55.A2	55	RM	RM_Type_IV	7	7	1	Type_IV_REases
10N.222.55.A3	126	Gabija	Gabija	13	14	2	GajB_3,GajA
10N.222.55.A3	138	dGTPase	dGTPase	14	14	1	Sp_dGTPase
10N.222.55.A3	66	RM	RM_Type_II	1	2	2	Type_II_MTases,Type_II_REases
10N.222.55.A3	86	RM	RM_Type_I	13	18	3	Type_I_MTases,Type_I_S,Type_I_REases
10N.222.55.A3	189	RM	RM_Type_IIG	8	8	1	Type_IIG
10N.222.55.A3	265	RM	RM_Type_IIG	1	1	1	Type_IIG
10N.222.55.A7	7	RM	RM_Type_II	397	399	3	Type_II_REases,Type_II_REases,Type_II_MTases
10N.222.55.A7	9	CBASS	CBASS_II	51	54	4	Sensing_SAVED,Jab,AG_E1_ThiF,Cyclase_II
10N.222.55.A7	18	Gabija	Gabija	32	34	3	GajA,GajB_1,GajB_2
10N.222.55.A7	41	dGTPase	dGTPase	4	4	1	Sp_dGTPase
10N.222.55.A8	6	Cas	CAS_Class1-Subtype-I-F	3	6	4	TniQ_I-F_1,cas8f_I-F_2,cas7f_I-F_2,cas6f_I_II_III_IV_V_VI_2
10N.222.55.A8	47	RM	RM_Type_IV	2	3	2	Type_IV_REases,Type_IV_REases
10N.222.55.A8	47	RM	RM_Type_I	8	10	3	Type_I_S,Type_I_MTases,Type_I_REases
10N.222.55.A8	53	RM	RM_Type_I	24	27	4	Type_I_REases,Type_I_REases,Type_I_MTases,Type_I_S
10N.222.55.A8	69	RM	RM_Type_I	11	14	3	Type_I_REases,Type_I_S,Type_I_MTases
10N.222.55.A8	34	CBASS	CBASS_II	57	59	3	2TM_new,E2,Cyclase_II
10N.222.55.A8	44	Retron	Retron_I_C	1	1	1	RT_1_C1
10N.222.55.A8	44	Gabija	Gabija	7	8	2	GajA,GajB_2
10N.222.55.A8	66	dGTPase	dGTPase	15	15	1	Sp_dGTPase
10N.222.55.A8	69	Gabija	Gabija	17	18	2	GajA,GajB_2
10N.222.55.A8	75	AbiH	AbiH	20	20	1	AbiH
10N.222.55.B10	24	dGTPase	dGTPase	41	41	1	Sp_dGTPase
10N.222.55.B10	8	Cas	CAS_Class1-Type-III	65	1	10	WYL_I_II_III_IV_V_VI_4,cas2_I_II_III_IV_V_VI_3,cas1_I_II_III_IV_V_VI_10,cas6_I_II_III_IV_V_VI_17,csm3gr7_III-D_2,csx19_III-D_6,csx10gr5_III-D_4,csm3gr7_III-D_3,cas10_III-D_1,RT_I_II_III_IV_V_VI_1
10N.222.55.B10	20	CBASS	CBASS_II	6	9	4	Phospholipase,Cyclase_II,AG_E1_ThiF,Jab
10N.222.55.B10	879	Rst_PARIS	PARIS_II_merge	1	1	1	AAA_21_DUF4435
10N.222.55.B10	4	RM	RM_Type_IV	10	11	2	Type_IV_REases,Type_IV_REases
10N.222.55.B10	4	RM	RM_Type_I	14	17	3	Type_I_REases,Type_I_S,Type_I_MTases
10N.222.55.B10	7	RM	RM_Type_IV	51	51	1	Type_IV_REases
10N.222.55.B10	33	RM	RM_Type_I	2	6	3	Type_I_REases,Type_I_S,Type_I_MTases
10N.222.55.B10	33	RM	RM_Type_IV	4	4	1	Type_IV_REases
10N.222.55.B10	77	RM	RM_Type_IV	46	46	1	Type_IV_REases
10N.222.55.B10	4	Zorya	Zorya_TypeI	6	9	4	ZorD,ZorC,ZorB,ZorA
10N.222.55.B11	32	Cas	CAS_Class1-Subtype-I-F	20	22	3	TniQ_I-F_1,cas8f_I-F_2,cas5f_I-F_1
10N.222.55.B11	18	Retron	Retron_II	164	165	2	NDT,RT_Tot
10N.222.55.B11	59	CBASS	CBASS_I	8	9	2	Effector_4TM_S_4TM,Cyclase_II
10N.222.55.B11	8	dGTPase	dGTPase	158	158	1	Sp_dGTPase
10N.222.55.B11	20	Shedu	Shedu	122	122	1	SduA
10N.222.55.B11	28	RADAR	radar_I	178	179	2	rdrB_I,rdrA_I
10N.222.55.B11	118	Lit	Lit	1	1	1	Lit
10N.222.55.B11	3	RM	RM_Type_I	131	133	3	Type_I_REases,Type_I_S,Type_I_MTases
10N.222.55.B11	44	RM	RM_Type_IV	112	112	1	Type_IV_REases
10N.222.55.B11	99	RM	RM_Type_I	5	8	3	Type_I_MTases,Type_I_S,Type_I_REases
10N.222.55.B11	128	RM	RM_Type_IV	14	15	2	Type_IV_REases,Type_IV_REases
10N.222.55.B11	26	Rst_PARIS	PARIS_I	9	10	2	AAA_15,DUF4435
10N.222.55.B11	32	DRT	DRT_1	18	19	2	drt1a,drt1b
10N.222.55.B12	5	dGTPase	dGTPase	299	299	1	Sp_dGTPase
10N.222.55.B12	20	RM	RM_Type_II	82	85	2	Type_II_MTases,Type_II_REases
10N.222.55.C12	23	dGTPase	dGTPase	22	22	1	Sp_dGTPase
10N.222.55.C12	27	BREX	BREX_I	6	15	6	brxA_DUF1819,brxB_DUF1788,brxC,pglX1,pglZA,brxL
10N.222.55.C12	92	Zorya	Zorya_TypeI	6	9	4	ZorD,ZorC,ZorB,ZorA
10N.222.55.C12	42	Cas	CAS_Class1-Type-III	2	14	9	cas10_III-D_1,csm3gr7_III-D_3,csx10gr5_III-D_4,csx19_III-D_6,csm3gr7_III-D_2,cas6_I_II_III_IV_V_VI_17,cas1_I_II_III_IV_V_VI_10,cas2_I_II_III_IV_V_VI_3,WYL_I_II_III_IV_V_VI_4
10N.222.55.C12	10	RM	RM_Type_IV	54	54	1	Type_IV_REases
10N.222.55.C12	92	RM	RM_Type_IV	10	11	2	Type_IV_REases,Type_IV_REases
10N.222.55.C12	92	RM	RM_Type_I	14	17	3	Type_I_REases,Type_I_S,Type_I_MTases
10N.222.55.C4	4	Gao_Ppl	Gao_Ppl	4	4	1	PplA
10N.222.55.C4	16	Rst_HelicaseDUF2290	Rst_HelicaseDUF2290	99	100	2	Helicase,DUF2290
10N.222.55.C4	27	dGTPase	dGTPase	56	56	1	Sp_dGTPase
10N.222.55.C4	5	Retron	Retron_I_B	93	94	2	RT_Tot,ATPase_TOPRIM_COG3593
10N.222.55.C4	4	RM	RM_Type_I	27	29	3	Type_I_MTases,Type_I_S,Type_I_REases
10N.222.55.C4	14	RM	RM_Type_III	88	89	2	Type_III_REases,Type_III_MTases
10N.222.55.C4	38	RM	RM_Type_III	54	55	2	Type_III_MTases,Type_III_REases
10N.222.55.C4	21	Septu	Septu	41	42	2	PtuB,PtuA
10N.222.55.C4	16	Hachiman	Hachiman	89	90	2	HamB,HamA_1
10N.222.55.C6	9	Septu	Septu	115	116	2	PtuA,PtuB
10N.222.55.C6	19	dGTPase	dGTPase	132	132	1	Sp_dGTPase
10N.222.55.C6	10	RM	RM_Type_I	8	11	3	Type_I_MTases,Type_I_S,Type_I_REases
10N.222.55.C6	10	RM	RM_Type_IV	14	15	2	Type_IV_REases,Type_IV_REases
10N.222.55.C7	40	dGTPase	dGTPase	24	24	1	Sp_dGTPase
10N.222.55.C7	95	Viperin	Viperin	1	1	1	pVip
10N.222.55.C7	19	Dnd	Dnd_ABCDEFGH	99	107	7	DndB,DndC,DndD,DndE,DptH,DptG,DptF
10N.222.55.E10	110	Zorya	Zorya_TypeI	6	9	4	ZorD,ZorC,ZorB,ZorA
10N.222.55.E10	82	dGTPase	dGTPase	43	43	1	Sp_dGTPase
10N.222.55.E10	134	Lamassu	Lamassu	4	5	2	LmuA,LmuB
10N.222.55.E10	61	Cas	CAS_Class1-Subtype-I-F	5	8	4	cas6f_I_II_III_IV_V_VI_2,cas7f_I-F_2,cas8f_I-F_2,TniQ_I-F_1
10N.222.55.E10	118	Cas	CAS_Class1-Subtype-III-D	1	9	8	cas2_I_II_III_IV_V_VI_3,cas1_I_II_III_IV_V_VI_10,cas6_I_II_III_IV_V_VI_17,csm3gr7_III-D_2,csx19_III-D_6,csx10gr5_III-D_4,csm3gr7_III-D_3,cas10_III-D_1
10N.222.55.E10	37	RM	RM_Type_IV	54	54	1	Type_IV_REases
10N.222.55.E10	42	RM	RM_Type_I	35	37	3	Type_I_MTases,Type_I_S,Type_I_REases
10N.222.55.E10	110	RM	RM_Type_IV	10	11	2	Type_IV_REases,Type_IV_REases
10N.222.55.E12	14	RM	RM_Type_I	21	23	3	Type_I_MTases,Type_I_S,Type_I_REases
10N.222.55.E12	71	RM	RM_Type_IV	54	54	1	Type_IV_REases
10N.222.55.E12	77	RM	RM_Type_IV	10	11	2	Type_IV_REases,Type_IV_REases
10N.222.55.E12	77	RM	RM_Type_I	14	17	3	Type_I_REases,Type_I_S,Type_I_MTases
10N.222.55.E12	102	Gao_Qat	Gao_Qat	3	6	4	QatD,QatC,QatB,QatA
10N.222.55.E12	77	Zorya	Zorya_TypeI	6	9	4	ZorD,ZorC,ZorB,ZorA
10N.222.55.E12	12	dGTPase	dGTPase	17	17	1	Sp_dGTPase
10N.222.55.E5	6	Septu	Septu	164	165	2	PtuA,PtuB_2
10N.222.55.E5	30	Septu	Septu	56	57	2	PtuA_2,PtuB_2
10N.222.55.E5	6	Gabija	Gabija	1	2	2	GajB_2,GajA
10N.222.55.E5	29	dGTPase	dGTPase	18	18	1	Sp_dGTPase
10N.222.55.E5	43	Gao_Ape	Gao_Ape	63	63	1	ApeA
10N.222.55.E5	76	Lamassu	Lamassu	2	3	2	LmuA,LmuB
10N.222.55.E5	6	RM	RM_Type_IV	160	160	1	Type_IV_REases
10N.222.55.E5	6	RM	RM_Type_I	161	163	3	Type_I_MTases,Type_I_S,Type_I_REases
10N.222.55.E5	17	RM	RM_Type_II	92	97	4	Type_II_REases,Type_II_REases,Type_II_REases,Type_II_MTases
10N.222.55.E5	32	RM	RM_Type_I	13	15	3	Type_I_REases,Type_I_S,Type_I_MTases
10N.222.55.E5	43	PrrC	PrrC	58	64	5	Type_I_REases,EcoprrI,Type_I_S,PrrC,Type_I_REases
10N.222.55.E7	32	Rst_PARIS	PARIS_II_merge	3	3	1	AAA_21_DUF4435
10N.222.55.E7	12	dCTPdeaminase	dCTPdeaminase	176	176	1	dCTPdeaminase
10N.222.55.E7	34	Gabija	Gabija	104	105	2	GajB_3,GajA
10N.222.55.E7	49	Gabija	Gabija	67	68	2	GajB_3,GajA
10N.222.55.E7	51	dGTPase	dGTPase	27	27	1	Sp_dGTPase
10N.222.55.E7	49	Septu	Septu	65	66	2	PtuB,PtuA
10N.222.55.E7	34	CBASS	CBASS_II	98	101	4	Phospholipase,Cyclase_II,AG_E1_ThiF,Jab
10N.222.55.E7	25	RM	RM_Type_I	7	11	4	Type_I_REases,Type_I_S,Type_I_MTases,Type_I_REases
10N.222.55.E7	54	RM	RM_Type_I	76	80	3	Type_I_MTases,Type_I_S,Type_I_REases
10N.222.55.E7	25	Cas	CAS_Class1-Subtype-I-F	2	4	3	cas7f_I-F_2,cas8f_I-F_2,TniQ_I-F_1
10N.222.55.E8	9	Cas	CAS_Class1-Type-III	3	15	9	cas10_III-D_1,csm3gr7_III-D_3,csx10gr5_III-D_4,csx19_III-D_6,csm3gr7_III-D_2,cas6_I_II_III_IV_V_VI_17,cas1_I_II_III_IV_V_VI_10,cas2_I_II_III_IV_V_VI_3,WYL_I_II_III_IV_V_VI_4
10N.222.55.E8	172	Cas	CAS_Class1-Subtype-I-F	1	1	6	cas6f_I_II_III_IV_V_VI_2,cas7f_I-F_2,cas5f_I-F_4,cas8f_I-F_8,cas3f_I-F_1,cas1_I-F_1
10N.222.55.E8	4	RM	RM_Type_I	3	7	5	Type_I_REases,Type_I_MTases,Type_I_MTases,Type_I_S,Type_I_REases
10N.222.55.E8	10	RM	RM_Type_IV	85	85	1	Type_IV_REases
10N.222.55.E8	152	RM	RM_Type_II	3	4	2	Type_II_REases,Type_II_MTases
10N.222.55.E8	57	Dnd	Dnd_ABCDEFGH	10	19	7	DndB,DndC,DndD,DndE,DptH,DptG,DptF
10N.222.55.E8	37	Septu	Septu	30	31	2	PtuA,PtuB
10N.222.55.E8	37	CBASS	CBASS_I	27	28	2	Cyclase_SMODS,Endonuc_small
10N.222.55.E8	33	dGTPase	dGTPase	36	36	1	Sp_dGTPase
10N.222.55.E8	37	Gao_Tmn	Gao_Tmn	29	29	1	TmnA
10N.222.55.F12	70	Shedu	Shedu	51	51	1	SduA
10N.222.55.F12	71	dGTPase	dGTPase	26	26	1	Sp_dGTPase
10N.222.55.F12	3	Dnd	Dnd_ABCDEFGH	50	59	7	DndB,DndC,DndD,DndE,DptH,DptG,DptF
10N.222.55.F12	48	Retron	Retron_I_A	143	145	3	RT_Tot,ATPase_TypeIA,PtuB
10N.222.55.F12	97	RM	RM_Type_I	1	7	5	Type_I_MTases,Type_I_REases,Type_I_S,Type_I_MTases,Type_I_MTases
10N.222.55.F12	97	RM	RM_Type_IV	13	13	1	Type_IV_REases
10N.222.55.F12	67	AVAST	AVAST_II	7	7	1	Avs2A
10N.222.55.F8	5	Rst_PARIS	PARIS_II_merge	3	3	1	AAA_21_DUF4435
10N.222.55.F8	1	dCTPdeaminase	dCTPdeaminase	176	176	1	dCTPdeaminase
10N.222.55.F8	37	Gabija	Gabija	67	68	2	GajB_3,GajA
10N.222.55.F8	40	dGTPase	dGTPase	26	26	1	Sp_dGTPase
10N.222.55.F8	54	Gabija	Gabija	45	46	2	GajB_3,GajA
10N.222.55.F8	37	Septu	Septu	65	66	2	PtuB,PtuA
10N.222.55.F8	54	CBASS	CBASS_II	39	42	4	Phospholipase,Cyclase_II,AG_E1_ThiF,Jab
10N.222.55.F8	30	RM	RM_Type_I	47	51	3	Type_I_MTases,Type_I_S,Type_I_REases
10N.222.55.F8	42	RM	RM_Type_I	3	5	3	Type_I_MTases,Type_I_S,Type_I_REases
10N.222.55.F8	42	Cas	CAS_Class1-Subtype-I-F	8	11	4	TniQ_I-F_1,cas8f_I-F_2,cas7f_I-F_2,cas6f_I_II_III_IV_V_VI_2
10N.222.55.F9	18	Cas	CAS_Class1-Type-III	65	77	9	WYL_I_II_III_IV_V_VI_4,cas2_I_II_III_IV_V_VI_3,cas1_I_II_III_IV_V_VI_10,cas6_I_II_III_IV_V_VI_17,csm3gr7_III-D_2,csx19_III-D_6,csx10gr5_III-D_4,csm3gr7_III-D_3,cas10_III-D_1
10N.222.55.F9	5	RM	RM_Type_I	83	85	3	Type_I_REases,Type_I_S,Type_I_MTases
10N.222.55.F9	51	RM	RM_Type_IV	22	22	1	Type_IV_REases
10N.222.55.F9	67	RM	RM_Type_I	46	49	3	Type_I_MTases,Type_I_S,Type_I_REases
10N.222.55.F9	4	dGTPase	dGTPase	40	40	1	Sp_dGTPase
10N.261.45.A10	26	CBASS	CBASS_II	96	98	3	Cyclase_II,E2,Sensing_SAVED
10N.261.45.A10	30	Retron	Retron_XIII	26	29	3	ARM,WHSWIM,RT_Tot
10N.261.45.A10	6	dGTPase	dGTPase	167	167	1	Sp_dGTPase
10N.261.45.A10	26	Gabija	Gabija	134	135	2	GajB_2,GajA
10N.261.45.A10	26	Cas	CAS_Class1-Subtype-I-F	103	106	4	cas6f_I_II_III_IV_V_VI_2,cas7f_I-F_2,cas8f_I-F_2,TniQ_I-F_1
10N.261.45.A10	1	RM	RM_Type_IV	45	45	1	Type_IV_REases
10N.261.45.A10	8	RM	RM_Type_IV	178	178	1	Type_IV_REases
10N.261.45.A1	24	dGTPase	dGTPase	240	240	1	Sp_dGTPase
10N.261.45.A1	80	Gao_Ppl	Gao_Ppl	98	98	1	PplA
10N.261.45.A1	167	AbiH	AbiH	5	5	1	AbiH
10N.261.45.A1	86	Cas	CAS_Class1-Subtype-I-F	62	65	4	TniQ_I-F_1,cas8f_I-F_2,cas7f_I-F_2,cas6f_I_II_III_IV_V_VI_2
10N.261.45.A1	83	Retron	Retron_I_A	1	3	3	RT_Tot,ATPase_TypeIA,HNH_TIGR02646
10N.261.45.A1	23	RM	RM_Type_II	2	3	2	Type_II_MTases,Type_II_REases
10N.261.45.A1	39	RM	RM_Type_I	21	23	3	Type_I_REases,Type_I_S,Type_I_MTases
10N.261.45.A1	60	RM	RM_Type_II	55	57	3	Type_II_REases,Type_II_REases,Type_II_MTases
10N.261.45.A1	80	RM	RM_Type_II	147	150	2	Type_II_MTases,Type_II_REases
10N.261.45.A1	86	RM	RM_Type_I	55	59	4	Type_I_REases,Type_I_MTases,Type_I_S,Type_I_REases
10N.261.45.A2	4	RM	RM_Type_I	182	186	5	Type_I_REases,Type_I_S,Type_I_MTases,Type_I_MTases,Type_I_REases
10N.261.45.A2	9	RM	RM_Type_IV	278	278	1	Type_IV_REases
10N.261.45.A2	2	SspBCDE	SspBCDE	130	132	3	SspD,SspC,SspB
10N.261.45.A2	36	dGTPase	dGTPase	14	14	1	Sp_dGTPase
10N.261.45.A3	43	dGTPase	dGTPase	89	89	1	Sp_dGTPase
10N.261.45.A3	47	DRT	DRT_1	94	95	2	drt1b,drt1a
10N.261.45.A3	13	BREX	BREX	45	49	4	brxB_DUF1788,brxC,pglX1,pglZB
10N.261.45.A3	15	RM	RM_Type_IIG	28	28	1	Type_IIG
10N.261.45.A4	64	Cas	CAS_Class1-Subtype-I-F	9	12	4	cas6f_I_II_III_IV_V_VI_2,cas7f_I-F_2,cas8f_I-F_2,TniQ_I-F_1
10N.261.45.A4	24	RM	RM_Type_IV	46	46	1	Type_IV_REases
10N.261.45.A4	26	RM	RM_Type_I	4	9	4	Type_I_S,Type_I_MTases,Type_I_S,Type_I_REases
10N.261.45.A4	74	RM	RM_Type_II	13	14	2	Type_II_REases,Type_II_MTases
10N.261.45.A4	76	Zorya	Zorya_TypeII	1	3	3	ZorE,ZorB,ZorA2	Vibrio tasmaniensis
10N.261.45.A4	26	Septu	Septu	7	8	2	PtuA,PtuB
10N.261.45.A4	17	dGTPase	dGTPase	37	37	1	Sp_dGTPase
10N.261.45.A4	28	Gao_Hhe	Gao_Hhe	115	115	1	HheA
10N.261.45.A6	55	Cas	CAS_Class1-Subtype-I-F	63	66	4	TniQ_I-F_1,cas8f_I-F_2,cas7f_I-F_2,cas6f_I_II_III_IV_V_VI_2
10N.261.45.A6	2	RM	RM_Type_II	14	17	2	Type_II_REases,Type_II_MTases
10N.261.45.A6	4	RM	RM_Type_II	2	3	2	Type_II_REases,Type_II_MTases
10N.261.45.A6	6	RM	RM_Type_II	60	62	3	Type_II_MTases,Type_II_REases,Type_II_REases
10N.261.45.A6	46	RM	RM_Type_I	44	46	3	Type_I_MTases,Type_I_S,Type_I_REases
10N.261.45.A6	55	RM	RM_Type_I	56	60	4	Type_I_REases,Type_I_MTases,Type_I_S,Type_I_REases
10N.261.45.A6	57	Retron	Retron_I_A	13	15	3	RT_Tot,ATPase_TypeIA,HNH_TIGR02646
10N.261.45.A6	2	Gao_Ppl	Gao_Ppl	66	66	1	PplA
10N.261.45.A6	42	dGTPase	dGTPase	14	14	1	Sp_dGTPase
10N.261.45.A6	130	AbiH	AbiH	5	5	1	AbiH
10N.261.45.A7	4	RM	RM_Type_I	45	47	3	Type_I_MTases,Type_I_S,Type_I_REases
10N.261.45.A7	21	RM	RM_Type_I	3	7	4	Type_I_REases,Type_I_S,Type_I_MTases,Type_I_REases
10N.261.45.A7	41	RM	RM_Type_II	28	30	3	Type_II_REases,Type_II_REases,Type_II_MTases
10N.261.45.A7	90	RM	RM_Type_II	2	3	2	Type_II_MTases,Type_II_REases
10N.261.45.A7	147	RM	RM_Type_II	8	11	2	Type_II_REases,Type_II_MTases
10N.261.45.A7	183	Cas	CAS_Class1-Subtype-I-F	8	11	4	cas6f_I_II_III_IV_V_VI_2,cas7f_I-F_2,cas8f_I-F_2,TniQ_I-F_1
10N.261.45.A7	187	Gao_Ppl	Gao_Ppl	34	34	1	PplA
10N.261.45.A7	359	AbiH	AbiH	1	1	1	AbiH
10N.261.45.A7	577	dGTPase	dGTPase	2	2	1	Sp_dGTPase
10N.261.45.A7	1807	Septu	Septu	1	2	2	PtuA,HNH_TIGR02646
10N.261.45.A8	54	dGTPase	dGTPase	15	15	1	Sp_dGTPase
10N.261.45.A8	17	DRT	DRT_3	10	12	3	drt3b,drt3b,drt3a
10N.261.45.A8	29	Dnd	Dnd_ABCDE	16	20	5	DndB,DndC,DndD,DndE,DndB
10N.261.45.A8	49	RM	RM_Type_IV	78	78	1	Type_IV_REases
10N.261.45.A8	49	RM	RM_Type_I	85	90	5	Type_I_MTases,Type_I_MTases,Type_I_S,Type_I_REases,Type_I_MTases
10N.261.45.B10	20	dGTPase	dGTPase	89	89	1	Sp_dGTPase
10N.261.45.B10	24	Shedu	Shedu	10	10	1	SduA
10N.261.45.B10	7	Zorya	Zorya_TypeII	541	546	5	ZorA2,ZorB,ZorE,ZorA,ZorB	Vibrio lentus
10N.261.45.B10	7	Druantia	Druantia_III	556	557	2	DruH,DruE_3
10N.261.45.B10	7	RM	RM_Type_I	549	551	3	Type_I_REases,Type_I_MTases,Type_I_S
10N.261.45.B10	7	RM	RM_Type_IV	553	554	2	Type_IV_REases,Type_IV_REases
10N.261.45.B10	24	RM	RM_Type_II	10	11	2	Type_II_REases,Type_II_MTases
10N.261.45.B2	5	dGTPase	dGTPase	207	207	1	Sp_dGTPase
10N.261.45.B2	7	Kiwa	Kiwa	574	575	2	KwaA,KwaB
10N.261.45.B2	16	Retron	Retron_XIII	89	92	3	RT_Tot,WHSWIM,ARM
10N.261.45.B2	26	RM	RM_Type_II	22	25	2	Type_II_MTases,Type_II_REases
10N.261.45.B2	15	Septu	Septu	235	236	2	PtuB,PtuA
10N.261.45.B7	35	dGTPase	dGTPase	16	16	1	Sp_dGTPase
10N.261.45.B7	55	AbiH	AbiH	8	8	1	AbiH
10N.261.45.B7	55	Viperin	Viperin	26	26	1	pVip
10N.261.45.B7	109	Wadjet	Wadjet_I	12	14	3	JetD_I,JetC_I,JetB_I
10N.261.45.B7	45	RM	RM_Type_I	19	22	3	Type_I_MTases,Type_I_S,Type_I_REases
10N.261.45.B7	55	RM	RM_Type_I	15	19	3	Type_I_REases,Type_I_S,Type_I_MTases
10N.261.45.B7	79	RM	RM_Type_IV	8	8	1	Type_IV_REases
10N.261.45.B9	18	RM	RM_Type_I	213	216	3	Type_I_REases,Type_I_S,Type_I_MTases
10N.261.45.B9	28	RM	RM_Type_I	100	116	8	Type_I_REases,Type_I_S,Type_I_MTases,Type_I_S,Type_I_MTases,Type_I_S,Type_I_REases,Type_I_MTases
10N.261.45.B9	36	RM	RM_Type_IV	3	4	2	Type_IV_REases,Type_IV_REases
10N.261.45.B9	36	RM	RM_Type_I	7	9	3	Type_I_S,Type_I_MTases,Type_I_REases
10N.261.45.B9	101	RM	RM_Type_I	7	9	3	Type_I_REases,Type_I_MTases,Type_I_S
10N.261.45.B9	36	Druantia	Druantia_III	1	2	2	DruE_3,DruH
10N.261.45.B9	89	Wadjet	Wadjet_I	12	14	3	JetD_I,JetC_I,JetB_I
10N.261.45.B9	5	dGTPase	dGTPase	50	50	1	Sp_dGTPase
10N.261.45.B9	25	dCTPdeaminase	dCTPdeaminase	31	31	1	dCTPdeaminase
10N.261.45.B9	36	Gao_Hhe	Gao_Hhe	21	21	1	HheA
10N.261.45.C12	19	dGTPase	dGTPase	56	56	1	Sp_dGTPase
10N.261.45.C12	23	Zorya	Zorya_TypeII	16	18	3	ZorA2,ZorB,ZorE	Vibrio splendidus
10N.261.45.C12	41	Retron	Retron_III	103	105	2	RT_Tot,PRTase
10N.261.45.C12	51	CBASS	CBASS_II	6	12	7	Effector_2TM_S_2TMBeta,Jab,AG_E1_ThiF,Cyclase_II,Sensing_SAVED,Cyclase_II,Sensing_SAVED
10N.261.45.C12	45	RM	RM_Type_II	14	16	2	Type_II_MTases,Type_II_REases
10N.261.45.C12	90	RM	RM_Type_IV	1	1	1	Type_IV_REases
10N.261.45.C3	11	dGTPase	dGTPase	18	18	1	Sp_dGTPase
10N.261.45.C3	27	Gabija	Gabija	285	286	2	GajB_3,GajA
10N.261.45.C3	16	AVAST	AVAST_II	154	154	1	Avs2A
10N.261.45.C3	46	DRT	DRT_1	9	10	2	drt1a,drt1b
10N.261.45.C3	5	CBASS	CBASS_II	853	859	7	Sensing_SAVED,Cyclase_SMODS,A_Cyclase_AGS_C,Sensing_SAVED,Jab,AG_E1_ThiF,Cyclase_II
10N.261.45.C3	14	RM	RM_Type_IV	6	6	1	Type_IV_REases
10N.261.45.C3	14	RM	RM_Type_I	7	11	5	Type_I_REases,Type_I_S,Type_I_MTases,Type_I_MTases,Type_I_REases
10N.261.45.C3	29	RM	RM_Type_II	9	10	2	Type_II_MTases,Type_II_REases
10N.261.45.C3	5	Cas	CAS_Class1-Subtype-I-F	848	851	4	cas6f_I_II_III_IV_V_VI_2,cas7f_I-F_2,cas8f_I-F_2,TniQ_I-F_1
10N.261.45.C6	8	dGTPase	dGTPase	169	169	1	Sp_dGTPase
10N.261.45.C6	35	Gao_Hhe	Gao_Hhe	19	19	1	HheA
10N.261.45.C6	19	Thoeris	Thoeris_I	13	16	3	ThsB_Global,ThsA_new_grand,ThsB_Global
10N.261.45.C6	37	Septu	Septu	5	7	2	PtuA,PtuB
10N.261.45.C6	5	CBASS	CBASS_II	75	78	4	Cyclase_II,AG_E1_ThiF,Jab,Effector_2TM_Saf_2TM
10N.261.45.C6	12	RM	RM_Type_I	94	103	5	Type_I_REases,Type_I_S,Type_I_MTases,Type_I_S,Type_I_REases
10N.261.45.C6	35	RM	RM_Type_I	16	20	3	Type_I_MTases,Type_I_S,Type_I_REases
10N.261.45.C6	48	RM	RM_Type_IV	11	11	1	Type_IV_REases
10N.261.45.C7	2	Gabija	Gabija	404	405	2	GajB_1,GajA
10N.261.45.C7	23	dGTPase	dGTPase	158	158	1	Sp_dGTPase
10N.261.45.C7	18	RM	RM_Type_I	359	363	3	Type_I_REases,Type_I_S,Type_I_MTases
10N.261.45.C7	84	RM	RM_Type_II	1	3	2	Type_II_REases,Type_II_MTases
10N.261.45.C7	2	AVAST	AVAST_V	408	408	1	Avs5A
10N.261.45.E10	108	RM	RM_Type_I	5	11	3	Type_I_MTases,Type_I_S,Type_I_REases
10N.261.45.E10	108	RM	RM_Type_I	21	25	5	Type_I_REases,Type_I_MTases,Type_I_MTases,Type_I_S,Type_I_REases
10N.261.45.E10	108	RM	RM_Type_IV	26	26	1	Type_IV_REases
10N.261.45.E10	119	RM	RM_Type_II	21	22	2	Type_II_MTases,Type_II_REases
10N.261.45.E10	149	RM	RM_Type_I	3	5	3	Type_I_MTases,Type_I_S,Type_I_REases
10N.261.45.E10	26	Zorya	Zorya_TypeII	4	10	6	ZorA2,ZorA2,ZorB,ZorE,ZorA2,ZorB	Vibrio lentus
10N.261.45.E10	17	DRT	DRT_1	12	13	2	drt1b,drt1a
10N.261.45.E10	98	AVAST	AVAST_I	3	5	3	Avs1A,Avs1B,Avs1C
10N.261.45.E10	44	dGTPase	dGTPase	140	140	1	Sp_dGTPase
10N.261.45.E11	36	dGTPase	dGTPase	33	33	1	Sp_dGTPase
10N.261.45.E11	73	AbiH	AbiH	7	7	1	AbiH
10N.261.45.E11	63	Retron	Retron_I_A	67	69	3	HNH_TIGR02646,ATPase_TypeIA,RT_Tot
10N.261.45.E11	2	RM	RM_Type_I	6	10	4	Type_I_S,Type_I_MTases,Type_I_S,Type_I_REases
10N.261.45.E11	33	RM	RM_Type_II	2	4	2	Type_II_MTases,Type_II_REases
10N.261.45.E12	8	dGTPase	dGTPase	88	88	1	Sp_dGTPase
10N.261.45.E12	12	Gabija	Gabija	8	9	2	GajA,GajB_3
10N.261.45.E12	16	Gao_Ape	Gao_Ape	6	6	1	ApeA
10N.261.45.E12	17	AVAST	AVAST_II	59	59	1	Avs2A
10N.261.45.E12	35	DRT	DRT_1	9	10	2	drt1a,drt1b
10N.261.45.E12	8	CBASS	CBASS_II	127	133	7	Cyclase_II,AG_E1_ThiF,Jab,Sensing_SAVED,A_Cyclase_AGS_C,Cyclase_SMODS,Sensing_SAVED
10N.261.45.E12	16	PrrC	PrrC	5	11	5	Type_I_REases,PrrC,Type_I_S,EcoprrI,Type_I_REases
10N.261.45.E12	8	Cas	CAS_Class1-Subtype-I-F	135	138	4	TniQ_I-F_1,cas8f_I-F_2,cas7f_I-F_2,cas6f_I_II_III_IV_V_VI_2
10N.261.45.E1	25	Cas	CAS_Class1-Subtype-I-F	63	66	4	TniQ_I-F_1,cas8f_I-F_2,cas7f_I-F_2,cas6f_I_II_III_IV_V_VI_2
10N.261.45.E1	78	Retron	Retron_I_A	1	3	3	HNH_TIGR02646,ATPase_TypeIA,RT_Tot
10N.261.45.E1	6	dGTPase	dGTPase	14	14	1	Sp_dGTPase
10N.261.45.E1	28	Gao_Ppl	Gao_Ppl	31	31	1	PplA
10N.261.45.E1	114	AbiH	AbiH	5	5	1	AbiH
10N.261.45.E1	24	RM	RM_Type_I	6	8	3	Type_I_MTases,Type_I_S,Type_I_REases
10N.261.45.E1	25	RM	RM_Type_I	56	60	4	Type_I_REases,Type_I_MTases,Type_I_S,Type_I_REases
10N.261.45.E1	86	RM	RM_Type_II	14	17	2	Type_II_REases,Type_II_MTases
10N.261.45.E2	18	Retron	Retron_I_A	67	69	3	HNH_TIGR02646,ATPase_TypeIA,RT_Tot
10N.261.45.E2	85	dGTPase	dGTPase	14	14	1	Sp_dGTPase
10N.261.45.E2	125	AbiH	AbiH	14	14	1	AbiH
10N.261.45.E2	4	RM	RM_Type_I	3	7	4	Type_I_REases,Type_I_S,Type_I_MTases,Type_I_S
10N.261.45.E2	9	RM	RM_Type_II	3	5	2	Type_II_REases,Type_II_MTases
10N.261.45.E3	2	Abi2	Abi2	91	91	1	Abi_2
10N.261.45.E3	4	dGTPase	dGTPase	348	348	1	Sp_dGTPase
10N.261.45.E3	19	Retron	Retron_IV	331	332	2	RT_Tot,2TM
10N.261.45.E3	28	CBASS	CBASS_I	23	24	2	Cyclase_SMODS,2TM_Gros
10N.261.45.E3	2	RM	RM_Type_I	89	93	4	Type_I_REases,Type_I_S,Type_I_MTases,Type_I_MTases
10N.261.45.E3	4	RM	RM_Type_IV	2	2	1	Type_IV_REases
10N.261.45.E3	7	RM	RM_Type_IV	90	90	1	Type_IV_REases
10N.261.45.E3	22	RM	RM_Type_II	319	320	2	Type_II_MTases,Type_II_REases
10N.261.45.E4	38	Thoeris	Thoeris_II	114	115	2	ThsB_Global,ThsA_new_petit
10N.261.45.E4	14	RM	RM_Type_II	2	3	2	Type_II_REases,Type_II_MTases
10N.261.45.E4	15	RM	RM_Type_I	7	9	3	Type_I_MTases,Type_I_S,Type_I_REases
10N.261.45.E4	28	RM	RM_Type_I	65	67	3	Type_I_MTases,Type_I_S,Type_I_REases
10N.261.45.E4	38	RM	RM_Type_I	117	120	3	Type_I_MTases,Type_I_S,Type_I_REases
10N.261.45.E4	45	RM	RM_Type_I	4	7	4	Type_I_MTases,Type_I_S,Type_I_REases,Type_I_MTases
10N.261.45.E4	46	RM	RM_Type_I	72	77	3	Type_I_S,Type_I_MTases,Type_I_REases
10N.261.45.E4	61	RM	RM_Type_IIG	30	30	1	Type_IIG
10N.261.45.E4	78	RM	RM_Type_III	22	25	2	Type_III_MTases,Type_III_REases
10N.261.45.E4	85	RM	RM_Type_II	6	7	2	Type_II_MTases,Type_II_REases
10N.261.45.E4	32	Cas	CAS_Class1-Subtype-I-F	3	8	6	cas1_I-F_1,cas3f_I-F_1,cas8f_I-F_8,cas5f_I-F_4,cas7f_I-F_2,cas6f_I_II_III_IV_V_VI_2
10N.261.45.E4	56	dGTPase	dGTPase	77	77	1	Sp_dGTPase
10N.261.45.E4	45	Septu	Septu	7	8	2	PtuA,PtuB
10N.261.45.E5	2	Gabija	Gabija	16	17	2	GajB_3,GajA
10N.261.45.E5	5	dGTPase	dGTPase	19	19	1	Sp_dGTPase
10N.261.45.E5	7	Lamassu	Lamassu	71	72	2	LmuB,LmuA
10N.261.45.E5	44	Rst_HelicaseDUF2290	Rst_HelicaseDUF2290	6	7	2	DUF2290,Helicase
10N.261.45.E5	32	Thoeris	Thoeris_I	1	2	2	ThsB_Global,ThsA_new_grand
10N.261.45.E5	59	Rst_PARIS	PARIS_I	86	87	2	DUF4435,AAA_15
10N.261.45.E5	19	DarTG	DarTG	80	82	3	DarT,DarG,DarT
10N.261.45.E5	19	Septu	Septu	86	87	2	PtuA,PtuB
10N.261.45.E5	2	CBASS	CBASS_II	2	5	4	Cyclase_II,AG_E1_ThiF,Jab,Sensing_SAVED
10N.261.45.E5	6	BREX	BREX_I	296	303	6	brxA_DUF1819,brxB_DUF1788,brxC,pglX1,pglZA,brxL
10N.261.45.E5	6	Hachiman	Hachiman	136	137	2	HamB,HamA_1
10N.261.45.E5	20	Dnd	Dnd_ABCDEFGH	89	100	8	DptF,DptG,DptH,DndE,DndD,DndC,DndB,DndB
10N.261.45.E5	4	Cas	CAS_Class1-Subtype-I-F	217	220	4	cas6f_I_II_III_IV_V_VI_2,cas7f_I-F_2,cas8f_I-F_2,TniQ_I-F_1
10N.261.45.E5	3	RM	RM_Type_I	219	222	3	Type_I_REases,Type_I_S,Type_I_MTases
10N.261.45.E5	3	RM	RM_Type_IV	220	220	1	Type_IV_REases
10N.261.45.E5	4	RM	RM_Type_I	223	227	4	Type_I_REases,Type_I_S,Type_I_MTases,Type_I_REases
10N.261.45.E5	19	RM	RM_Type_I	83	88	3	Type_I_MTases,Type_I_S,Type_I_REases
10N.261.45.E5	41	RM	RM_Type_I	5	7	3	Type_I_REases,Type_I_MTases,Type_I_S
10N.261.45.E6	11	RADAR	radar_I	187	188	2	rdrB_I,rdrA_I
10N.261.45.E6	16	dGTPase	dGTPase	16	16	1	Sp_dGTPase
10N.261.45.E6	5	Dsr	Dsr_I	80	80	1	Dsr1
10N.261.45.E6	46	CBASS	CBASS_I	9	10	2	2TM_Gros,Cyclase_SMODS
10N.261.45.E6	10	Cas	CAS_Class1-Subtype-I-F	7	10	4	cas8f_I-F_4,cas5f_I-F_4,cas7f_I-F_1,cas6f_I_II_III_IV_V_VI_2
10N.261.45.E8	33	Gabija	Gabija	9	10	2	GajA,GajB_1
10N.261.45.E8	65	dGTPase	dGTPase	16	16	1	Sp_dGTPase
10N.261.45.E8	84	Gabija	Gabija	6	7	2	GajA,GajB_3
10N.261.45.E8	31	Retron	Retron_I_A	57	59	3	PtuB,ATPase_TypeIA,RT_Tot
10N.261.45.E8	200	CBASS	CBASS_III	4	7	4	Endonuc_small,TRIP13,bacHORMA_1,Cyclase_II
10N.261.45.E8	229	CBASS	CBASS_I	2	3	2	Effector_4TM_S_4TM,Cyclase_SMODS
10N.261.45.E8	163	RM	RM_Type_IV	22	22	1	Type_IV_REases
10N.261.45.F1	3	Rst_PARIS	PARIS_II_merge	111	111	1	AAA_21_DUF4435
10N.261.45.F1	15	dGTPase	dGTPase	349	349	1	Sp_dGTPase
10N.261.45.F1	31	dCTPdeaminase	dCTPdeaminase	16	16	1	dCTPdeaminase
10N.261.45.F1	38	Gabija	Gabija	34	35	2	GajB_3,GajA
10N.261.45.F1	38	CBASS	CBASS_II	28	31	4	Phospholipase,Cyclase_II,AG_E1_ThiF,Jab
10N.261.45.F1	14	RM	RM_Type_III	5	6	2	Type_III_MTases,Type_III_REases
10N.261.45.F4	38	dGTPase	dGTPase	55	55	1	Sp_dGTPase
10N.261.45.F4	101	Gabija	Gabija	8	9	2	GajA,GajB_3
10N.261.45.F4	21	DRT	DRT_1	1	2	2	drt1b,drt1a
10N.261.45.F4	54	AVAST	AVAST_II	1	1	1	Avs2A
10N.261.45.F6	73	Cas	CAS_Class1-Subtype-I-F	4	7	4	cas6f_I_II_III_IV_V_VI_2,cas7f_I-F_2,cas8f_I-F_2,TniQ_I-F_1
10N.261.45.F6	8	RM	RM_Type_I	1	3	2	Type_I_MTases,Type_I_REases
10N.261.45.F6	13	RM	RM_Type_I	1	4	3	Type_I_REases,Type_I_S,Type_I_MTases
10N.261.45.F6	15	RM	RM_Type_II	129	130	2	Type_II_MTases,Type_II_REases
10N.261.45.F6	55	RM	RM_Type_I	4	8	4	Type_I_REases,Type_I_S,Type_I_MTases,Type_I_S
10N.261.45.F6	57	SspBCDE	SspBCDE	35	39	5	SspG,SspF,SspD,SspC,SspB
10N.261.45.F6	31	Wadjet	Wadjet_I	1	3	3	JetB_I,JetC_I,JetD_I
10N.261.45.F6	3	dGTPase	dGTPase	51	51	1	Sp_dGTPase
10N.261.45.F7	5	dGTPase	dGTPase	16	16	1	Sp_dGTPase
10N.261.45.F7	26	RM	RM_Type_II	7	9	3	Type_II_REases,Type_II_MTases,Type_II_REases
10N.261.45.F7	9	Dsr	Dsr_I	159	159	1	Dsr1
10N.261.45.F8	5	Rst_PARIS	PARIS_I	175	176	2	DUF4435,AAA_15
10N.261.45.F8	1	DarTG	DarTG	182	183	2	DarT,DarG
10N.261.45.F8	1	Gao_Ppl	Gao_Ppl	174	174	1	PplA
10N.261.45.F8	1	Nhi	Nhi	352	352	1	Nhi
10N.261.45.F8	5	dGTPase	dGTPase	89	89	1	Sp_dGTPase
10N.261.45.F8	5	RM	RM_Type_III	646	647	2	Type_III_MTases,Type_III_REases
10N.261.45.F9	1	dGTPase	dGTPase	89	89	1	Sp_dGTPase
10N.261.45.F9	5	Gabija	Gabija	85	86	2	GajB_1,GajA
10N.261.45.F9	14	Retron	Retron_VI	81	82	2	RT_Tot,HTH
10N.261.45.F9	1	RM	RM_Type_IV	665	665	1	Type_IV_REases
10N.261.45.F9	1	RM	RM_Type_I	666	669	3	Type_I_MTases,Type_I_S,Type_I_REases
10N.261.46.A10	90	dGTPase	dGTPase	15	15	1	Sp_dGTPase
10N.261.46.A10	138	Septu	Septu	9	10	2	PtuA,PtuB
10N.261.46.A10	168	DarTG	DarTG	2	3	2	DarT,DarG
10N.261.46.A10	3	RM	RM_Type_I	61	63	3	Type_I_REases,Type_I_S,Type_I_MTases
10N.261.46.A10	70	RM	RM_Type_I	8	10	3	Type_I_REases,Type_I_MTases,Type_I_S
10N.261.46.A10	70	RM	RM_Type_IV	12	13	2	Type_IV_REases,Type_IV_REases
10N.261.46.A10	92	RM	RM_Type_I	6	8	3	Type_I_MTases,Type_I_S,Type_I_REases
10N.261.46.A10	138	RM	RM_Type_IV	6	6	1	Type_IV_REases
10N.261.46.A10	138	RM	RM_Type_I	7	11	3	Type_I_REases,Type_I_S,Type_I_MTases
10N.261.46.A10	14	SspBCDE	SspBCDE	18	20	3	SspD,SspC,SspB
10N.261.46.A12	8	Kiwa	Kiwa	13	14	2	KwaB,KwaA
10N.261.46.A12	45	dGTPase	dGTPase	17	17	1	Sp_dGTPase
10N.261.46.A12	86	Zorya	Zorya_TypeII	4	6	3	ZorE,ZorB,ZorA2	Vibrio splendidus
10N.261.46.A12	24	Retron	Retron_XI	31	31	1	RT_11
10N.261.46.A12	112	Rst_PARIS	PARIS_II_merge	1	1	1	AAA_21_DUF4435
10N.261.46.A12	35	RM	RM_Type_II	17	18	2	Type_II_REases,Type_II_MTases
10N.261.46.A12	69	RM	RM_Type_I	8	11	3	Type_I_MTases,Type_I_S,Type_I_REases
10N.261.46.A12	86	RM	RM_Type_IV	2	3	2	Type_IV_REases,Type_IV_REases
10N.261.46.A12	86	RM	RM_Type_I	9	11	3	Type_I_S,Type_I_MTases,Type_I_REases
10N.261.46.A12	53	Septu	Septu	1	2	2	PtuA,PtuB_2
10N.261.46.A12	97	DRT	DRT_5	10	10	1	drt5
10N.261.46.A1	6	Gao_Her	Gao_Her_SIR	115	116	2	SIR2,HerA_SIR2
10N.261.46.A1	5	dGTPase	dGTPase	916	916	1	Sp_dGTPase
10N.261.46.A1	6	AbiH	AbiH	113	113	1	AbiH
10N.261.46.A1	23	Septu	Septu	574	575	2	PtuB,PtuA
10N.261.46.A1	5	RM	RM_Type_IV	299	300	2	Type_IV_REases,Type_IV_REases
10N.261.46.A1	5	RM	RM_Type_I	307	309	3	Type_I_REases,Type_I_S,Type_I_MTases
10N.261.46.A1	5	RM	RM_Type_I	801	804	3	Type_I_REases,Type_I_S,Type_I_MTases
10N.261.46.A1	5	RM	RM_Type_I	877	881	4	Type_I_REases,Type_I_S,Type_I_MTases,Type_I_REases
10N.261.46.A1	5	Zorya	Zorya_TypeI	295	298	4	ZorD,ZorC,ZorB,ZorA
10N.261.46.A1	5	Cas	CAS_Class1-Subtype-I-F	870	873	4	cas6f_I_II_III_IV_V_VI_2,cas7f_I-F_2,cas8f_I-F_2,TniQ_I-F_1
10N.261.46.A2	4	Cas	CAS_Class1-Subtype-I-F	25	28	4	TniQ_I-F_1,cas8f_I-F_2,cas7f_I-F_2,cas6f_I_II_III_IV_V_VI_2
10N.261.46.A2	3	Hachiman	Hachiman	317	318	2	HamA_2,HamB
10N.261.46.A2	4	CBASS	CBASS_II	18	24	7	Cyclase_II,AG_E1_ThiF,Jab,Sensing_SAVED,A_Cyclase_AGS_C,Cyclase_SMODS,Sensing_SAVED
10N.261.46.A2	1	Gabija	Gabija	182	183	2	GajB_1,GajA
10N.261.46.A2	3	AbiH	AbiH	320	320	1	AbiH
10N.261.46.A2	17	dGTPase	dGTPase	162	162	1	Sp_dGTPase
10N.261.46.A2	2	RM	RM_Type_IV	287	288	2	Type_IV_REases,Type_IV_REases
10N.261.46.A2	2	RM	RM_Type_I	289	291	3	Type_I_REases,Type_I_S,Type_I_MTases
10N.261.46.A2	7	RM	RM_Type_IV	255	255	1	Type_IV_REases
10N.261.46.A3	25	Abi2	Abi2	18	18	1	Abi_2
10N.261.46.A3	27	Gao_Tmn	Gao_Tmn	148	148	1	TmnA
10N.261.46.A3	83	dGTPase	dGTPase	17	17	1	Sp_dGTPase
10N.261.46.A3	26	Septu	Septu	112	113	2	PtuB,PtuA
10N.261.46.A3	27	Septu	Septu	146	147	2	PtuB,PtuA
10N.261.46.A3	79	Septu	Septu	17	18	2	PtuB_2,PtuA
10N.261.46.A3	150	DarTG	DarTG	17	18	2	DarT,DarG
10N.261.46.A3	15	RM	RM_Type_II	3	4	2	Type_II_REases,Type_II_MTases
10N.261.46.A3	25	RM	RM_Type_I	16	34	9	Type_I_REases,Type_I_REases,Type_I_MTases,Type_I_REases,Type_I_S,Type_I_MTases,Type_I_S,Type_I_MTases,Type_I_S
10N.261.46.A3	26	RM	RM_Type_I	86	88	3	Type_I_REases,Type_I_S,Type_I_MTases
10N.261.46.A3	26	RM	RM_Type_I	111	116	4	Type_I_REases,Type_I_S,Type_I_MTases,Type_I_S
10N.261.46.A3	37	RM	RM_Type_I	44	47	3	Type_I_MTases,Type_I_S,Type_I_REases
10N.261.46.A3	40	RM	RM_Type_III	39	40	2	Type_III_REases,Type_III_MTases
10N.261.46.A3	56	RM	RM_Type_II	1	2	2	Type_II_REases,Type_II_MTases
10N.261.46.A3	133	RM	RM_Type_I	13	15	3	Type_I_S,Type_I_MTases,Type_I_REases
10N.261.46.A3	150	RM	RM_Type_I	14	16	3	Type_I_MTases,Type_I_S,Type_I_REases
10N.261.46.A3	25	Cas	CAS_Class1-Subtype-I-F	38	41	4	TniQ_I-F_1,cas8f_I-F_2,cas7f_I-F_2,cas6f_I_II_III_IV_V_VI_2
10N.261.46.A3	133	Cas	CAS_Class1-Subtype-I-F	17	20	4	TniQ_I-F_1,cas8f_I-F_2,cas7f_I-F_1,cas6f_I_II_III_IV_V_VI_1
10N.261.46.A5	5	Rst_HelicaseDUF2290	Rst_HelicaseDUF2290	3	4	2	DUF2290,Helicase
10N.261.46.A5	9	Gabija	Gabija	186	187	2	GajA,GajB_1
10N.261.46.A5	23	dGTPase	dGTPase	56	56	1	Sp_dGTPase
10N.261.46.A5	22	Dnd	Dnd_ABCDEFGH	91	98	7	DndB,DndC,DndD,DndE,DptH,DptG,DptF
10N.261.46.A5	13	Gao_Qat	Gao_Qat	172	175	4	QatA,QatB,QatC,QatD
10N.261.46.A9	2	Abi2	Abi2	63	63	1	Abi_2
10N.261.46.A9	29	dGTPase	dGTPase	69	69	1	Sp_dGTPase
10N.261.46.A9	38	Rst_3HP	Rst_3HP	23	25	3	Hp3,Hp2,Hp1
10N.261.46.A9	79	dGTPase	dGTPase	50	50	1	Sp_dGTPase
10N.261.46.A9	125	Gao_Ppl	Gao_Ppl	3	3	1	PplA
10N.261.46.A9	48	Cas	CAS_Class1-Subtype-I-F	25	29	5	TniQ_I-F_1,cas8f_I-F_2,cas5f_I-F_1,cas7f_I-F_2,cas6f_I_II_III_IV_V_VI_2
10N.261.46.A9	93	CBASS	CBASS_II	5	7	3	Cyclase_II,E2,2TM_new
10N.261.46.A9	177	CBASS	CBASS_I	1	2	2	Cyclase_SMODS,2TM_Gros
10N.261.46.A9	186	CBASS	CBASS_I	2	3	2	AG_cyclase,2TM_5
10N.261.46.A9	25	RM	RM_Type_I	4	7	4	Type_I_REases,Type_I_S,Type_I_MTases,Type_I_MTases
10N.261.46.A9	38	RM	RM_Type_I	1	3	3	Type_I_MTases,Type_I_S,Type_I_REases
10N.261.46.A9	48	RM	RM_Type_I	14	20	4	Type_I_REases,Type_I_REases,Type_I_MTases,Type_I_S
10N.261.46.A9	56	RM	RM_Type_I	7	11	3	Type_I_REases,Type_I_S,Type_I_MTases
10N.261.46.A9	142	RM	RM_Type_II	50	51	2	Type_II_MTases,Type_II_REases
10N.261.46.A9	56	Septu	Septu	8	9	2	PtuB,PtuA
10N.261.46.A9	168	Dsr	Dsr_II	4	4	1	Dsr2
10N.261.46.A9	14	Zorya	Zorya_TypeII	13	15	3	ZorA2,ZorB,ZorE	Vibrio tasmaniensis
10N.261.46.A9	30	Hachiman	Hachiman	26	27	2	HamB,HamA_1
10N.261.46.B10	67	dGTPase	dGTPase	137	137	1	Sp_dGTPase
10N.261.46.B10	208	Shedu	Shedu	15	15	1	SduA
10N.261.46.B10	222	Rst_3HP	Rst_3HP	4	6	3	Hp3,Hp2,Hp1
10N.261.46.B10	3	Zorya	Zorya_TypeII	8	10	3	ZorA2,ZorB,ZorE	Vibrio splendidus
10N.261.46.B10	160	CBASS	CBASS_I	18	19	2	Cyclase_II,Effector_2TM_S_2TMBeta
10N.261.46.B10	168	CBASS	CBASS_II	4	7	4	Phospholipase,Cyclase_II,AG_E1_ThiF,Jab
10N.261.46.B10	8	Druantia	Druantia_III	18	19	2	DruE_3,DruH
10N.261.46.B10	13	Rst_PARIS	PARIS_I	33	34	2	DUF4435,AAA_15
10N.261.46.B10	198	Gao_Qat	Gao_Qat	1	6	5	QatA,QatA,QatB,QatC,QatD
10N.261.46.B10	8	RM	RM_Type_IV	6	6	1	Type_IV_REases
10N.261.46.B10	8	RM	RM_Type_I	20	22	3	Type_I_S,Type_I_MTases,Type_I_REases
10N.261.46.B10	15	RM	RM_Type_II	1	3	2	Type_II_MTases,Type_II_REases
10N.261.46.B10	18	RM	RM_Type_I	22	26	5	Type_I_REases,Type_I_S,Type_I_MTases,Type_I_MTases,Type_I_REases
10N.261.46.B10	46	RM	RM_Type_I	10	12	3	Type_I_MTases,Type_I_S,Type_I_REases
10N.261.46.B10	46	RM	RM_Type_I	20	22	3	Type_I_REases,Type_I_S,Type_I_MTases
10N.261.46.B10	64	RM	RM_Type_I	14	21	4	Type_I_S,Type_I_MTases,Type_I_REases,Type_I_REases
10N.261.46.B10	64	Cas	CAS_Class1-Subtype-I-F	6	9	4	cas6f_I_II_III_IV_V_VI_2,cas7f_I-F_2,cas8f_I-F_2,TniQ_I-F_1
10N.261.46.B10	47	Septu	Septu	1	2	2	PtuB,PtuA
10N.261.46.B10	186	DarTG	DarTG	1	2	2	DarG,DarT
10N.261.46.B12	1	Gabija	Gabija	756	757	2	GajA,GajB_1
10N.261.46.B12	1	Shedu	Shedu	758	758	1	SduA
10N.261.46.B12	9	dGTPase	dGTPase	88	88	1	Sp_dGTPase
10N.261.46.B12	30	Rst_PARIS	PARIS_I	61	62	2	AAA_15,DUF4435
10N.261.46.B12	5	Septu	Septu	217	218	2	PtuA,PtuB
10N.261.46.B12	13	RM	RM_Type_I	229	231	3	Type_I_MTases,Type_I_S,Type_I_REases
10N.261.46.B12	13	RM	RM_Type_IV	232	233	2	Type_IV_REases,Type_IV_REases
10N.261.46.B12	13	RM	RM_Type_IV	314	314	1	Type_IV_REases
10N.261.46.B12	22	RM	RM_Type_II	111	112	2	Type_II_REases,Type_II_MTases
10N.261.46.B1	22	Gao_Tmn	Gao_Tmn	27	27	1	TmnA
10N.261.46.B1	47	dGTPase	dGTPase	17	17	1	Sp_dGTPase
10N.261.46.B1	23	DRT	DRT_4	3	3	1	drt4
10N.261.46.B1	43	RM	RM_Type_I	7	14	4	Type_I_S,Type_I_MTases,Type_I_REases,Type_I_REases
10N.261.46.B1	43	Cas	CAS_Class1-Subtype-I-F	1	4	4	cas6f_I_II_III_IV_V_VI_2,cas7f_I-F_2,cas8f_I-F_2,TniQ_I-F_1
10N.261.46.B2	53	Hachiman	Hachiman	9	10	2	HamB,HamA_2
10N.261.46.B2	88	Zorya	Zorya_TypeI	1	3	3	ZorB,ZorC,ZorD
10N.261.46.B2	64	BREX	BREX_I	8	16	6	brxL,pglZA,pglX1,brxC,brxB_DUF1788,brxA_DUF1819
10N.261.46.B2	26	Gabija	Gabija	195	196	2	GajA,GajB_2
10N.261.46.B2	62	dGTPase	dGTPase	27	27	1	Sp_dGTPase
10N.261.46.B2	80	Gabija	Gabija	6	7	2	GajA,GajB_2
10N.261.46.B2	4	RM	RM_Type_I	81	86	4	Type_I_S,Type_I_MTases,Type_I_S,Type_I_REases
10N.261.46.B2	16	RM	RM_Type_I	79	82	3	Type_I_REases,Type_I_MTases,Type_I_S
10N.261.46.B2	28	RM	RM_Type_I	1	3	3	Type_I_MTases,Type_I_S,Type_I_REases
10N.261.46.B2	63	RM	RM_Type_IV	8	8	1	Type_IV_REases
10N.261.46.B2	63	RM	RM_Type_I	9	11	3	Type_I_REases,Type_I_MTases,Type_I_S
10N.261.46.B2	64	RM	RM_Type_IV	12	12	1	Type_IV_REases
10N.261.46.B2	75	RM	RM_Type_IV	2	2	1	Type_IV_REases
10N.261.46.B2	79	RM	RM_Type_III	44	45	2	Type_III_REases,Type_III_MTases
10N.261.46.B2	4	DRT	DRT_2	88	88	1	drt2
10N.261.46.B2	46	Septu	Septu	94	95	2	PtuB,PtuA
10N.261.46.B4	26	Gabija	Gabija	9	10	2	GajA,GajB_2
10N.261.46.B4	38	dGTPase	dGTPase	17	17	1	Sp_dGTPase
10N.261.46.B4	65	Gao_Tmn	Gao_Tmn	6	6	1	TmnA
10N.261.46.B4	26	DarTG	DarTG	2	3	2	DarG,DarT
10N.261.46.B4	65	Septu	Septu	7	8	2	PtuA,PtuB
10N.261.46.B4	4	Retron	Retron_XII	16	16	1	RT_12
10N.261.46.B4	25	RM	RM_Type_II	92	93	2	Type_II_REases,Type_II_MTases
10N.261.46.B4	26	RM	RM_Type_I	4	7	3	Type_I_MTases,Type_I_S,Type_I_REases
10N.261.46.B4	32	RM	RM_Type_I	35	39	4	Type_I_S,Type_I_MTases,Type_I_S,Type_I_REases
10N.261.46.B4	109	RM	RM_Type_IV	5	7	2	Type_IV_REases,Type_IV_REases
10N.261.46.B4	114	RM	RM_Type_I	3	6	3	Type_I_REases,Type_I_S,Type_I_MTases
10N.261.46.B5	22	dGTPase	dGTPase	18	18	1	Sp_dGTPase
10N.261.46.B5	18	Druantia	Druantia_III	48	49	2	DruE_3,DruH
10N.261.46.B5	15	RM	RM_Type_IIG	377	377	1	Type_IIG
10N.261.46.B5	18	RM	RM_Type_I	50	52	3	Type_I_S,Type_I_MTases,Type_I_REases
10N.261.46.B5	33	RM	RM_Type_I	11	14	3	Type_I_REases,Type_I_S,Type_I_MTases
10N.261.46.B6	36	dGTPase	dGTPase	41	41	1	Sp_dGTPase
10N.261.46.B6	64	Viperin	Viperin	4	4	1	pVip
10N.261.46.B6	1	SspBCDE	SspBCDE	50	53	4	SspE,SspB,SspC,SspD
10N.261.46.B6	109	Zorya	Zorya_TypeI	4	7	4	ZorD,ZorC,ZorB,ZorA
10N.261.46.B6	115	Zorya	Zorya_TypeII	1	3	3	ZorE,ZorB,ZorA2	Vibrio tasmaniensis
10N.261.46.B6	1	CBASS	CBASS_II	12	15	4	Jab,AG_E1_ThiF,Cyclase_II,Phospholipase
10N.261.46.B6	67	Retron	Retron_I_A	107	109	3	HNH_TIGR02646,ATPase_TypeIA,RT_Tot
10N.261.46.B6	108	Retron	Retron_VI	3	4	2	RT_Tot,HTH
10N.261.46.B6	3	RM	RM_Type_I	79	84	4	Type_I_S,Type_I_MTases,Type_I_S,Type_I_REases
10N.261.46.B6	60	RM	RM_Type_IIG	48	48	1	Type_IIG
10N.261.46.B6	107	RM	RM_Type_I	12	18	3	Type_I_REases,Type_I_MTases,Type_I_S
10N.261.46.B6	109	RM	RM_Type_I	8	12	3	Type_I_REases,Type_I_S,Type_I_MTases
10N.261.46.B6	109	Cas	CAS_Class1-Subtype-I-F	13	17	5	WYL_I_II_III_IV_V_VI_4,TniQ_I-F_1,cas8f_I-F_2,cas7f_I-F_1,cas6f_I_II_III_IV_V_VI_1
10N.261.46.B6	3	Septu	Septu	82	83	2	PtuA,PtuB
10N.261.46.B7	54	RM	RM_Type_III	11	12	2	Type_III_REases,Type_III_MTases
10N.261.46.B7	20	Wadjet	Wadjet_I	2	5	4	JetD_I,JetC_I,JetB_I,JetA_I
10N.261.46.B7	49	Wadjet	Wadjet_I	1	3	3	JetB_I,JetC_I,JetD_I
10N.261.46.B7	95	Retron	Retron_I_A	19	21	3	HNH_TIGR02646,ATPase_TypeIA,RT_Tot
10N.261.46.B7	6	dGTPase	dGTPase	33	33	1	Sp_dGTPase
10N.261.46.B7	102	Rst_TIR-NLR	Rst_TIR-NLR	10	10	1	TIR
10N.261.46.C10	10	Gao_Ppl	Gao_Ppl	98	98	1	PplA
10N.261.46.C10	48	dGTPase	dGTPase	12	12	1	Sp_dGTPase
10N.261.46.C10	256	AbiH	AbiH	5	5	1	AbiH
10N.261.46.C10	165	Retron	Retron_I_A	1	3	3	HNH_TIGR02646,ATPase_TypeIA,RT_Tot
10N.261.46.C10	3	RM	RM_Type_II	14	17	2	Type_II_REases,Type_II_MTases
10N.261.46.C10	32	RM	RM_Type_II	50	52	3	Type_II_REases,Type_II_REases,Type_II_MTases
10N.261.46.C10	63	RM	RM_Type_I	55	59	4	Type_I_REases,Type_I_MTases,Type_I_S,Type_I_REases
10N.261.46.C10	88	RM	RM_Type_II	2	3	2	Type_II_MTases,Type_II_REases
10N.261.46.C10	101	RM	RM_Type_I	13	15	3	Type_I_REases,Type_I_S,Type_I_MTases
10N.261.46.C10	63	Cas	CAS_Class1-Subtype-I-F	62	65	4	TniQ_I-F_1,cas8f_I-F_2,cas7f_I-F_2,cas6f_I_II_III_IV_V_VI_2
10N.261.46.C11	12	Retron	Retron_I_A	50	52	3	HNH_TIGR02646,ATPase_TypeIA,RT_Tot
10N.261.46.C11	41	dGTPase	dGTPase	56	56	1	Sp_dGTPase
10N.261.46.C11	6	RM	RM_Type_I	8	11	3	Type_I_REases,Type_I_S,Type_I_MTases
10N.261.46.C11	11	RM	RM_Type_I	33	37	3	Type_I_REases,Type_I_S,Type_I_MTases
10N.261.46.C11	12	RM	RM_Type_I	41	44	3	Type_I_REases,Type_I_S,Type_I_MTases
10N.261.46.C11	16	RM	RM_Type_II	17	22	4	Type_II_MTases,Type_II_REases,Type_II_REases,Type_II_REases
10N.261.46.C3	19	Gao_Hhe	Gao_Hhe	13	13	1	HheA
10N.261.46.C3	20	dGTPase	dGTPase	19	19	1	Sp_dGTPase
10N.261.46.C3	76	Viperin	Viperin	24	24	1	pVip
10N.261.46.C3	19	Druantia	Druantia_III	32	33	2	DruH,DruE_3
10N.261.46.C3	16	RM	RM_Type_I	79	81	3	Type_I_MTases,Type_I_S,Type_I_REases
10N.261.46.C3	19	RM	RM_Type_I	25	27	3	Type_I_REases,Type_I_MTases,Type_I_S
10N.261.46.C3	19	RM	RM_Type_IV	30	31	2	Type_IV_REases,Type_IV_REases
10N.261.46.C3	66	RM	RM_Type_IV	14	14	1	Type_IV_REases
10N.261.46.C3	89	RM	RM_Type_I	7	9	3	Type_I_REases,Type_I_MTases,Type_I_S
10N.261.46.C3	101	RM	RM_Type_I	23	27	3	Type_I_REases,Type_I_S,Type_I_MTases
10N.261.46.C3	44	Wadjet	Wadjet_I	10	12	3	JetD_I,JetC_I,JetB_I
10N.261.46.C4	16	dGTPase	dGTPase	164	164	1	Sp_dGTPase
10N.261.46.C4	39	Abi2	Abi2	56	56	1	Abi_2
10N.261.46.C4	7	RM	RM_Type_I	123	132	5	Type_I_REases,Type_I_S,Type_I_MTases,Type_I_S,Type_I_REases
10N.261.46.C4	39	RM	RM_Type_IV	23	23	1	Type_IV_REases
10N.261.46.C4	39	RM	RM_Type_IV	43	43	1	Type_IV_REases
10N.261.46.C4	39	RM	RM_Type_I	44	47	3	Type_I_REases,Type_I_MTases,Type_I_S
10N.261.46.C4	39	RM	RM_Type_IV	50	50	1	Type_IV_REases
10N.261.46.C4	39	RM	RM_Type_I	54	59	3	Type_I_MTases,Type_I_S,Type_I_REases
10N.261.46.C4	66	RM	RM_Type_I	44	48	3	Type_I_MTases,Type_I_S,Type_I_REases
10N.261.46.C4	11	Septu	Septu	243	244	2	PtuA,PtuB
10N.261.46.C4	39	Septu	Septu	48	49	2	PtuA,PtuB
10N.261.46.C5	44	Viperin	Viperin	27	27	1	pVip
10N.261.46.C5	52	dGTPase	dGTPase	37	37	1	Sp_dGTPase
10N.261.46.C5	43	Septu	Septu	88	89	2	PtuB,PtuA
10N.261.46.C5	1	Retron	Retron_I_A	107	109	3	HNH_TIGR02646,ATPase_TypeIA,RT_Tot
10N.261.46.C5	63	Retron	Retron_VI	10	11	2	HTH,RT_Tot
10N.261.46.C5	34	RM	RM_Type_IIG	55	55	1	Type_IIG
10N.261.46.C5	43	RM	RM_Type_I	87	92	4	Type_I_REases,Type_I_S,Type_I_MTases,Type_I_S
10N.261.46.C5	52	RM	RM_Type_I	65	71	3	Type_I_REases,Type_I_MTases,Type_I_S
10N.261.46.C5	56	RM	RM_Type_I	9	13	3	Type_I_MTases,Type_I_S,Type_I_REases
10N.261.46.C5	56	Zorya	Zorya_TypeI	14	17	4	ZorA,ZorB,ZorC,ZorD
10N.261.46.C5	106	Zorya	Zorya_TypeII	1	3	3	ZorE,ZorB,ZorA2	Vibrio tasmaniensis
10N.261.46.C5	56	Cas	CAS_Class1-Subtype-I-F	4	8	5	cas6f_I_II_III_IV_V_VI_1,cas7f_I-F_1,cas8f_I-F_2,TniQ_I-F_1,WYL_I_II_III_IV_V_VI_4
10N.261.46.C6	38	dGTPase	dGTPase	15	15	1	Sp_dGTPase
10N.261.46.C6	6	Septu	Septu	6	7	2	PtuB,PtuA
10N.261.46.C6	188	DarTG	DarTG	2	3	2	DarT,DarG
10N.261.46.C6	6	RM	RM_Type_I	5	9	3	Type_I_MTases,Type_I_S,Type_I_REases
10N.261.46.C6	6	RM	RM_Type_IV	10	10	1	Type_IV_REases
10N.261.46.C6	32	RM	RM_Type_IV	215	216	2	Type_IV_REases,Type_IV_REases
10N.261.46.C6	32	RM	RM_Type_I	218	220	3	Type_I_S,Type_I_MTases,Type_I_REases
10N.261.46.C6	57	RM	RM_Type_I	10	12	3	Type_I_MTases,Type_I_S,Type_I_REases
10N.261.46.C6	85	RM	RM_Type_III	4	5	2	Type_III_REases,Type_III_MTases
10N.261.46.C6	126	RM	RM_Type_I	6	8	3	Type_I_MTases,Type_I_S,Type_I_REases
10N.261.46.E11	17	dGTPase	dGTPase	15	15	1	Sp_dGTPase
10N.261.46.E11	55	Hachiman	Hachiman	1	2	2	HamA_1,HamB
10N.261.46.E11	40	RM	RM_Type_I	12	14	3	Type_I_MTases,Type_I_S,Type_I_REases
10N.261.46.E11	51	RM	RM_Type_I	19	21	3	Type_I_REases,Type_I_MTases,Type_I_S
10N.261.46.E11	62	RM	RM_Type_IIG	35	35	1	Type_IIG
10N.261.46.E11	40	Septu	Septu	16	17	2	PtuA_2,PtuB_2
10N.261.46.E12	40	Cas	CAS_Class1-Subtype-I-F	60	63	4	cas6f_I_II_III_IV_V_VI_2,cas7f_I-F_2,cas8f_I-F_2,TniQ_I-F_1
10N.261.46.E12	3	RM	RM_Type_I	18	20	3	Type_I_REases,Type_I_S,Type_I_MTases
10N.261.46.E12	4	RM	RM_Type_II	51	53	3	Type_II_REases,Type_II_REases,Type_II_MTases
10N.261.46.E12	15	RM	RM_Type_II	19	22	2	Type_II_MTases,Type_II_REases
10N.261.46.E12	40	RM	RM_Type_I	66	70	4	Type_I_REases,Type_I_S,Type_I_MTases,Type_I_REases
10N.261.46.E12	126	RM	RM_Type_II	2	3	2	Type_II_MTases,Type_II_REases
10N.261.46.E12	37	Retron	Retron_I_A	67	69	3	HNH_TIGR02646,ATPase_TypeIA,RT_Tot
10N.261.46.E12	53	Gao_Ppl	Gao_Ppl	98	98	1	PplA
10N.261.46.E12	78	dGTPase	dGTPase	34	34	1	Sp_dGTPase
10N.261.46.E12	214	AbiH	AbiH	7	7	1	AbiH
10N.261.46.E4	19	Retron	Retron_III	81	83	2	RT_Tot,PRTase
10N.261.46.E4	24	BREX	BREX_I	5	12	6	brxA_DUF1819,brxB_DUF1788,brxC,pglX1,pglZA,brxL
10N.261.46.E4	59	Retron	Retron_II	1	2	2	RT_Tot,NDT
10N.261.46.E4	84	DRT	DRT_2	11	11	1	drt2
10N.261.46.E4	4	dGTPase	dGTPase	89	89	1	Sp_dGTPase
10N.261.46.E4	45	Gabija	Gabija	21	22	2	GajA,GajB_1
10N.261.46.E4	81	Gabija	Gabija	7	8	2	GajA,GajB_3
10N.261.46.E4	22	RM	RM_Type_I	70	72	3	Type_I_REases,Type_I_S,Type_I_MTases
10N.261.46.E4	84	RM	RM_Type_I	12	15	4	Type_I_REases,Type_I_S,Type_I_MTases,Type_I_MTases
10N.261.46.E7	3	Gabija	Gabija	435	436	2	GajA,GajB_1
10N.261.46.E7	31	dGTPase	dGTPase	19	19	1	Sp_dGTPase
10N.261.46.E7	18	Hachiman	Hachiman	794	795	2	HamB,HamA_2
10N.261.46.E7	13	CBASS	CBASS_I	162	163	2	Cyclase_II,Effector_4TM_S_4TM
10N.261.46.E7	18	CBASS	CBASS_II	812	818	7	Sensing_SAVED,Cyclase_SMODS,A_Cyclase_AGS_C,Sensing_SAVED,Jab,AG_E1_ThiF,Cyclase_II
10N.261.46.E7	34	Retron	Retron_II	52	53	2	RT_Tot,NDT
10N.261.46.E7	9	RM	RM_Type_IIG	1	1	1	Type_IIG
10N.261.46.E7	13	RM	RM_Type_I	158	161	4	Type_I_REases,Type_I_S,Type_I_MTases,Type_I_S
10N.261.46.E7	18	RM	RM_Type_IV	239	252	4	Type_IV_REases,Type_IV_REases,Type_IV_REases,Type_IV_REases
10N.261.46.E7	18	RM	RM_Type_I	241	251	6	Type_I_REases,Type_I_S,Type_I_MTases,Type_I_S,Type_I_MTases,Type_I_REases
10N.261.46.E7	18	Cas	CAS_Class1-Subtype-I-F	807	810	4	cas6f_I_II_III_IV_V_VI_2,cas7f_I-F_2,cas8f_I-F_2,TniQ_I-F_1
10N.261.46.E7	18	Septu	Septu	247	248	2	PtuB,PtuA
10N.261.46.E7	18	Septu	Septu	413	414	2	PtuA,PtuB
10N.261.46.E8	78	Retron	Retron_I_A	6	8	3	RT_Tot,ATPase_TypeIA,HNH_TIGR02646
10N.261.46.E8	64	Gao_Ppl	Gao_Ppl	66	66	1	PplA
10N.261.46.E8	84	dGTPase	dGTPase	14	14	1	Sp_dGTPase
10N.261.46.E8	167	AbiH	AbiH	5	5	1	AbiH
10N.261.46.E8	21	Cas	CAS_Class1-Subtype-I-F	21	24	4	cas6f_I_II_III_IV_V_VI_2,cas7f_I-F_2,cas8f_I-F_2,TniQ_I-F_1
10N.261.46.E8	1	RM	RM_Type_I	6	8	3	Type_I_MTases,Type_I_S,Type_I_REases
10N.261.46.E8	21	RM	RM_Type_I	27	31	4	Type_I_REases,Type_I_S,Type_I_MTases,Type_I_REases
10N.261.46.E8	64	RM	RM_Type_II	14	17	2	Type_II_REases,Type_II_MTases
10N.261.46.E9	8	RM	RM_Type_II	724	729	4	Type_II_MTases,Type_II_REases,Type_II_REases,Type_II_REases
10N.261.46.E9	9	RM	RM_Type_IV	289	290	2	Type_IV_REases,Type_IV_REases
10N.261.46.E9	9	RM	RM_Type_I	293	295	3	Type_I_S,Type_I_MTases,Type_I_REases
10N.261.46.E9	26	RM	RM_Type_I	79	83	3	Type_I_MTases,Type_I_S,Type_I_REases
10N.261.46.E9	53	RM	RM_Type_I	4	7	3	Type_I_REases,Type_I_S,Type_I_MTases
10N.261.46.E9	8	Rst_PARIS	PARIS_II_merge	563	564	2	AAA_21_DUF4435,AAA_21_DUF4435
10N.261.46.E9	9	Druantia	Druantia_III	286	287	2	DruE_3,DruH
10N.261.46.E9	9	Zorya	Zorya_TypeII	297	302	5	ZorB,ZorA,ZorE,ZorB,ZorA2	Vibrio splendidus
10N.261.46.E9	31	Septu	Septu	27	28	2	PtuA,PtuB
10N.261.46.E9	11	CBASS	CBASS_II	176	178	3	2TM_new,E2,Cyclase_II
10N.261.46.E9	2	dGTPase	dGTPase	365	365	1	Sp_dGTPase
10N.261.46.E9	30	AbiH	AbiH	28	28	1	AbiH
10N.261.46.E9	53	Gao_Ape	Gao_Ape	9	9	1	ApeA
10N.261.46.F11	43	dGTPase	dGTPase	56	56	1	Sp_dGTPase
10N.261.46.F11	93	DISARM	DISARM_1	39	42	4	drmC,drmB,drmA,drmMI
10N.261.46.F11	109	dCTPdeaminase	dCTPdeaminase	74	74	1	dCTPdeaminase
10N.261.46.F11	79	DRT	DRT_1	22	23	2	drt1a,drt1b
10N.261.46.F11	50	CBASS	CBASS_I	13	14	2	Cyclase_SMODS,2TM_Gros
10N.261.46.F11	87	Cas	CAS_Class1-Subtype-I-F	2	5	4	TniQ_I-F_1,cas8f_I-F_2,cas7f_I-F_2,cas6f_I_II_III_IV_V_VI_2
10N.261.46.F11	14	RM	RM_Type_II	2	3	2	Type_II_MTases,Type_II_REases
10N.261.46.F11	18	RM	RM_Type_I	38	41	3	Type_I_S,Type_I_MTases,Type_I_REases
10N.261.46.F11	26	RM	RM_Type_IIG	2	2	1	Type_IIG
10N.261.46.F11	44	RM	RM_Type_I	17	21	4	Type_I_REases,Type_I_S,Type_I_MTases,Type_I_S
10N.261.46.F11	72	RM	RM_Type_IIG	1	1	1	Type_IIG
10N.261.46.F11	79	RM	RM_Type_I	17	21	4	Type_I_REases,Type_I_MTases,Type_I_S,Type_I_REases
10N.261.46.F11	93	RM	RM_Type_II	36	42	2	Type_II_REases,Type_II_MTases
10N.261.46.F11	98	RM	RM_Type_I	25	28	4	Type_I_REases,Type_I_S,Type_I_MTases,Type_I_MTases
10N.261.46.F11	138	RM	RM_Type_II	1	2	2	Type_II_REases,Type_II_MTases
10N.261.46.F12	69	Gao_Ppl	Gao_Ppl	99	99	1	PplA
10N.261.46.F12	77	AbiH	AbiH	14	14	1	AbiH
10N.261.46.F12	83	dGTPase	dGTPase	14	14	1	Sp_dGTPase
10N.261.46.F12	14	Cas	CAS_Class1-Subtype-I-F	58	61	4	cas6f_I_II_III_IV_V_VI_2,cas7f_I-F_2,cas8f_I-F_2,TniQ_I-F_1
10N.261.46.F12	1	CBASS	CBASS_II	28	31	4	Jab,AG_E1_ThiF,Cyclase_II,Phospholipase
10N.261.46.F12	61	Retron	Retron_I_A	67	69	3	HNH_TIGR02646,ATPase_TypeIA,RT_Tot
10N.261.46.F12	14	RM	RM_Type_I	64	68	4	Type_I_REases,Type_I_S,Type_I_MTases,Type_I_REases
10N.261.46.F12	69	RM	RM_Type_II	148	151	2	Type_II_MTases,Type_II_REases
10N.261.46.F12	1	SspBCDE	SspBCDE	62	65	4	SspE,SspB,SspC,SspD
10N.261.46.F1	6	Gabija	Gabija	286	288	3	GajA,GajA,GajB_2
10N.261.46.F1	13	dGTPase	dGTPase	15	15	1	Sp_dGTPase
10N.261.46.F1	17	Rst_3HP	Rst_3HP	45	47	3	Hp3,Hp2,Hp1
10N.261.46.F1	36	dCTPdeaminase	dCTPdeaminase	5	5	1	dCTPdeaminase
10N.261.46.F1	36	Shedu	Shedu	6	6	1	SduA
10N.261.46.F1	30	CBASS	CBASS_I	36	37	2	Cyclase_SMODS,2TM_Gros
10N.261.46.F1	57	CBASS	CBASS_I	2	3	2	Effector_4TM_S_4TM,Cyclase_SMODS
10N.261.46.F1	21	RM	RM_Type_IV	19	19	1	Type_IV_REases
10N.261.46.F1	136	RM	RM_Type_II	1	2	2	Type_II_MTases,Type_II_REases
10N.261.46.F1	3	Septu	Septu	34	35	2	PtuB,PtuA
10N.261.46.F4	7	RM	RM_Type_I	3	5	3	Type_I_S,Type_I_MTases,Type_I_REases
10N.261.46.F4	29	RM	RM_Type_I	6	8	3	Type_I_REases,Type_I_S,Type_I_MTases
10N.261.46.F4	29	RM	RM_Type_I	22	24	3	Type_I_REases,Type_I_S,Type_I_MTases
10N.261.46.F4	49	RM	RM_Type_I	4	8	3	Type_I_REases,Type_I_S,Type_I_MTases
10N.261.46.F4	69	RM	RM_Type_I	17	20	3	Type_I_REases,Type_I_MTases,Type_I_S
10N.261.46.F4	81	RM	RM_Type_III	44	48	3	Type_III_REases,Type_III_MTases,Type_III_MTases
10N.261.46.F4	73	Hachiman	Hachiman	4	5	2	HamB,HamA_2
10N.261.46.F4	29	Septu	Septu	19	20	2	PtuB,PtuA
10N.261.46.F4	2	CBASS	CBASS_II	3	6	4	Sensing_SAVED,Cyclase_II,AG_E1_ThiF,Jab
10N.261.46.F4	33	Retron	Retron_I_B	71	72	2	ATPase_TOPRIM_COG3593,RT_Tot
10N.261.46.F4	69	Retron	Retron_VI	28	29	2	RT_Tot,HTH
10N.261.46.F4	14	Rst_3HP	Rst_3HP	103	105	3	Hp3,Hp2,Hp1
10N.261.46.F4	28	dGTPase	dGTPase	92	92	1	Sp_dGTPase
10N.261.46.F4	88	Shedu	Shedu	2	2	1	SduA
10N.261.46.F4	91	Gao_Hhe	Gao_Hhe	13	13	1	HheA
10N.261.46.F4	110	Lit	Lit	1	1	1	Lit
10N.261.46.F8	34	dGTPase	dGTPase	62	62	1	Sp_dGTPase
10N.261.46.F8	89	DRT	DRT_1	1	2	2	drt1a,drt1b
10N.261.46.F8	160	Zorya	Zorya_TypeII	4	10	6	ZorA2,ZorA2,ZorB,ZorE,ZorA2,ZorB	Vibrio lentus
10N.261.46.F8	117	RM	RM_Type_II	6	7	2	Type_II_REases,Type_II_MTases
10N.261.46.F8	130	RM	RM_Type_IV	5	5	1	Type_IV_REases
10N.261.46.F8	130	RM	RM_Type_I	6	10	5	Type_I_REases,Type_I_S,Type_I_MTases,Type_I_MTases,Type_I_REases
10N.261.46.F8	130	RM	RM_Type_I	20	26	3	Type_I_REases,Type_I_S,Type_I_MTases
10N.261.46.F8	167	RM	RM_Type_I	1	3	3	Type_I_REases,Type_I_S,Type_I_MTases
10N.261.48.A12	42	Shedu	Shedu	1	1	1	SduA
10N.261.48.A12	60	dGTPase	dGTPase	16	16	1	Sp_dGTPase
10N.261.48.A12	32	RM	RM_Type_I	43	47	4	Type_I_S,Type_I_MTases,Type_I_S,Type_I_REases
10N.261.48.A12	76	RM	RM_Type_I	7	12	3	Type_I_REases,Type_I_S,Type_I_MTases
10N.261.48.A12	110	RM	RM_Type_IV	1	2	2	Type_IV_REases,Type_IV_REases
10N.261.48.A12	99	Hachiman	Hachiman	1	3	3	HamB,HamB,HamA_1
10N.261.48.A1	9	Gabija	Gabija	153	154	2	GajB_1,GajA
10N.261.48.A1	15	Gabija	Gabija	32	33	2	GajB_3,GajA
10N.261.48.A1	24	dGTPase	dGTPase	55	55	1	Sp_dGTPase
10N.261.48.A1	28	Retron	Retron_I_A	4	6	3	RT_Tot,ATPase_TypeIA,PtuB
10N.261.48.A1	3	RM	RM_Type_I	800	802	3	Type_I_REases,Type_I_S,Type_I_MTases
10N.261.48.A2	14	Viperin	Viperin	22	22	1	pVip
10N.261.48.A2	722	dGTPase	dGTPase	3	3	1	Sp_dGTPase
10N.261.48.A2	22	SspBCDE	SspBCDE	80	83	4	SspD,SspC,SspB,SspE
10N.261.48.A2	634	Zorya	Zorya_TypeII	1	4	3	ZorE,ZorA2,ZorB	Vibrio tasmaniensis
10N.261.48.A2	815	Zorya	Zorya_TypeI	1	3	3	ZorC,ZorB,ZorA
10N.261.48.A2	163	CBASS	CBASS_II	4	7	4	Jab,AG_E1_ThiF,Cyclase_II,Phospholipase
10N.261.48.A2	778	Retron	Retron_VI	3	4	2	RT_Tot,HTH
10N.261.48.A2	236	RM	RM_Type_IIG	8	8	1	Type_IIG
10N.261.48.A2	347	RM	RM_Type_I	2	8	3	Type_I_S,Type_I_MTases,Type_I_REases
10N.261.48.A2	805	Cas	CAS_Class1-Subtype-I-F	1	3	3	cas6f_I_II_III_IV_V_VI_1,cas7f_I-F_1,cas8f_I-F_2
10N.261.48.A2	51	Septu	Septu	6	7	2	PtuB,PtuA
10N.261.48.A2	570	Septu	Septu	1	2	2	PtuA,HNH_TIGR02646
10N.261.48.A3	26	dGTPase	dGTPase	83	83	1	Sp_dGTPase
10N.261.48.A3	142	Zorya	Zorya_TypeII	4	10	6	ZorA2,ZorA2,ZorB,ZorE,ZorA2,ZorB	Vibrio lentus
10N.261.48.A3	21	RM	RM_Type_IV	5	5	1	Type_IV_REases
10N.261.48.A3	21	RM	RM_Type_I	6	10	5	Type_I_REases,Type_I_S,Type_I_MTases,Type_I_MTases,Type_I_REases
10N.261.48.A3	21	RM	RM_Type_I	20	26	3	Type_I_REases,Type_I_S,Type_I_MTases
10N.261.48.A3	72	RM	RM_Type_I	1	3	3	Type_I_REases,Type_I_S,Type_I_MTases
10N.261.48.A3	114	RM	RM_Type_II	6	7	2	Type_II_REases,Type_II_MTases
10N.261.48.A3	1	DRT	DRT_1	1	2	2	drt1a,drt1b
10N.261.48.A5	24	dGTPase	dGTPase	16	16	1	Sp_dGTPase
10N.261.48.A5	17	RM	RM_Type_IV	235	236	2	Type_IV_REases,Type_IV_REases
10N.261.48.A6	31	dGTPase	dGTPase	17	17	1	Sp_dGTPase
10N.261.48.A6	27	RM	RM_Type_IV	26	27	2	Type_IV_REases,Type_IV_REases
10N.261.48.A9	3	Shedu	Shedu	239	239	1	SduA
10N.261.48.A9	12	dGTPase	dGTPase	18	18	1	Sp_dGTPase
10N.261.48.A9	6	RM	RM_Type_I	94	96	3	Type_I_MTases,Type_I_S,Type_I_REases
10N.261.48.A9	6	RM	RM_Type_IV	97	98	2	Type_IV_REases,Type_IV_REases
10N.261.48.A9	10	RM	RM_Type_II	210	211	2	Type_II_REases,Type_II_MTases
10N.261.48.B11	4	Gabija	Gabija	52	53	2	GajB_1,GajA
10N.261.48.B11	5	dGTPase	dGTPase	326	326	1	Sp_dGTPase
10N.261.48.B11	5	Cas	CAS_Class1-Subtype-I-F	370	373	4	TniQ_I-F_1,cas8f_I-F_2,cas7f_I-F_2,cas6f_I_II_III_IV_V_VI_2
10N.261.48.B11	5	CBASS	CBASS_II	363	369	7	Cyclase_II,AG_E1_ThiF,Jab,Sensing_SAVED,A_Cyclase_AGS_C,Cyclase_SMODS,Sensing_SAVED
10N.261.48.B11	20	Retron	Retron_II	201	202	2	RT_Tot,NDT
10N.261.48.B11	5	RM	RM_Type_IV	925	938	4	Type_IV_REases,Type_IV_REases,Type_IV_REases,Type_IV_REases
10N.261.48.B11	5	RM	RM_Type_I	926	936	6	Type_I_REases,Type_I_MTases,Type_I_S,Type_I_MTases,Type_I_S,Type_I_REases
10N.261.48.B11	18	RM	RM_Type_IV	97	97	1	Type_IV_REases
10N.261.48.B11	19	RM	RM_Type_III	2	3	2	Type_III_MTases,Type_III_REases
10N.261.48.B11	4	Dsr	Dsr_I	145	145	1	Dsr1
10N.261.48.B11	5	Septu	Septu	764	765	2	PtuB,PtuA
[truncated: 3,625 more rows]
