# Supplementary material for: Interpretable machine learning reveals a diverse arsenal of anti-defenses in bacterial viruses
Source: bioRxiv preprint, doi:10.1101/2024.06.14.598830, version 1 (2024-06-14)
Supplement: Supplementary Data 2 [file 598830_file03.xlsx]

## Sheet: Content
Putative anti-defense proteins predicted by the deep-learning model
Sheet name	Defense system type
i	AbiH
ii	AbiU
iii	Avs
iv	Brex
v	CBASS
vi	CRISPR
vii	dGTP
viii	DND
ix	DRT
x	Druantia
xi	Gabija
xii	Lamassu
xiii	Paris
xiv	Retron
xv	RM
xvi	Septu
xvii	Shedu
xviii	Wadjet
xix	Zorya

## Sheet: i_AbiH
Supplementary Data 2 (i): Putative anti-defense proteins predicted by the deep-learning model for AbiH defense system
SCORE	Pair of bacterial and viral genomes	Virus ID	Virus accession	Anti-defense protein sequence, a.a.	Bacteria ID	Defense system protein sequence, a.a.	Anti-defense protein cluster number, 0 % identity	Anti-defense protein cluster number, 30 % identity	Anti-defense protein cluster number, 50 % identity	Anti-defense protein cluster number, 70 % identity	Anti-defense protein cluster number, 80 % identity	Anti-defense protein cluster number, 90 % identity	Anti-defense protein cluster number, 95 % identity	Anti-defense protein cluster number, 99 % identity	Anti-defense protein cluster number, 99,9 % identity
100	10N.286.45.F3 - 1.125.O.	1.125.O.	MG592500	VFGAAPAFHPPFLLVHTSPFLSNLNLINVMYIRKYA	10N.286.45.F3	MTTLIIIGNGFDIQNRLPTSYWHFHQRYHSRLDDHFAFFPEFFDDQDWSNFEDNLGTFNEDEFNEQAAWQPSIEDMAESSSHLFGYEDEIAQKVDELVDDVTTSFITWVRAVDVTSASQLFDFPNGAKFINFNYTSTLQDVYTIPDEDVLHIHGKARRNVIFGHGIGNGNQSTSMPVNENAPWFDESQRTLASVTDKFHKPVPEILELHRAQLEGYGCIEKIIVIGHSVNDIDLPYFRCILNAYPDANWENWNYGDGISDTHDKLIALGVPQHQLSSSSSNGLEATYPKQST*	27	27	30	30	30	31	32	36	40
94.8093	10N.286.45.F3 - 1.080.O.	1.080.O.	MG592455	VAPFIRPLFLLVKSFFYHSYIPIVVKFKCLKCDVRAKR	10N.286.45.F3	MTTLIIIGNGFDIQNRLPTSYWHFHQRYHSRLDDHFAFFPEFFDDQDWSNFEDNLGTFNEDEFNEQAAWQPSIEDMAESSSHLFGYEDEIAQKVDELVDDVTTSFITWVRAVDVTSASQLFDFPNGAKFINFNYTSTLQDVYTIPDEDVLHIHGKARRNVIFGHGIGNGNQSTSMPVNENAPWFDESQRTLASVTDKFHKPVPEILELHRAQLEGYGCIEKIIVIGHSVNDIDLPYFRCILNAYPDANWENWNYGDGISDTHDKLIALGVPQHQLSSSSSNGLEATYPKQST*	25	25	28	28	28	29	30	34	38
92.995	10N.261.45.E1 - 1.056.O.	1.056.O.	MG592436	VEVFLYLVHVHQLTYCLLMIYINCFQMYLYFLRRRGAIILS	10N.261.45.E1	MTTLIIIGNGFDIQNRLPTSYWHFHQRYHSRLDDHFAFFPEFFDDQDWSNFEDNLGTFNEDEFNEQAAWQPSIEDMAESSSHLFGYEDEIAQKVDELVDDVTTSFITWVRAVDVTSASQLFDFPNGAKFINFNYTSTLQDVYTIPDEDVLHIHGKARRNVIFGHGIGNGNQSTSMPVNENAPWFDESQRTLASVTDKFHKPVPEILELHRAQLEGYGCIEKIIVIGHSVNDIDLPYFRCILNAYPDANWENWNYGDGISDTHDKLIALGVPQHQLSSSSSNGLEATYPKQST*	26	26	29	29	29	30	31	35	39
77.2319	10N.261.46.A2 - 1.062.O.	1.062.O.	MG592440	VFGAAPAFHPPFLLVHTSPFLSNLNLINVMYIRKYA	10N.261.46.A2	MKLYIIGNGFDIHHKLDTYYTTFGLFLKDNNREVFELLVEHFGFSDLDPSNENSISDPLWSNFEHNLSLLDTVTVLEAFEDYLPDYSSDDFRDRDRYSFEIEMERVLDQLTTDLYACFKNFILSVRLATLEPKLAVNLDHEALYLTFNYTNTLNHYYGISDDNVLFIHEKAQEDEIELVLGHGVDPKNFEEQLAVPPAELSEEEYDEWCQYQADQYDYSYQRGKDMINRYFTTTFKGTGKIIDMNSKFFDSLSNVEEVLILGHSLADVDLPYFRKIVSSINPNIKWTVSYHVDEDRLKHLAKLKSIGVLDAVASRIENI*	27	27	30	30	30	31	32	36	40
75.2614	10N.261.46.A1 - 1.008.O.	1.008.O.	MG592394	VFGAAPAFHPPFLLVHTSPFLSNLNLINVMYIRKYA	10N.261.46.A1	MTTLVIVGNGFDRQNGLPTSYEHFYEKYNDQLGEYFVYFPGFFDDQAWSSFEENLGVFDEDNFRESAAWQPSMDEMIESSKYVNGYNDEISQKTDELVGEIRSAFTTWIRSVDAKDAMRFMEFPKGCKFINFNYTSTLQDVYFVSDEDVLHIHGKARRDVIFGHGIGNGNQSSSMALNDDEPWFEEAHQTLASVTDKFHKPVHDILEEHRNSLEGYGDVKKIIVIGHSINDIDIPYLKCILSAYPNAVWRNWNHKDEENDGVSSTHDKLLNIGVPVDKLYSLSSKNLGRAYPIS*	27	27	30	30	30	31	32	36	40
65.5397	10N.222.45.A4 - 2.092.O.	2.092.O.	MG592663	VFGAAPAFHPPFLLVHTSPFLSNLNLINVMYIRKYA	10N.222.45.A4	MTTLYIIGNGFDLWHDLPTSYSQFYEFAQSTLDELENYYSFDLHDHEPWHDFENALGAFCWEDFFDFHNEVDIQAEDFRPSFVYGLEDELTEQTDIHVSTVKETFIGWVNQIDVTRASEKITFPENAHFITFNYTSTLQLIYGIEDESVFHIHGRAETNDDLIFGHGENIVEIPEVDEDGESTRSMFSDAESAARYPLHALKKPVDDVLEQNSSYFEELGDVTEVVIIGHSLNAIDLPYFRRIANGTEGARWKVCCYTDEERTEHAQALIGCGISQDQIEICKYDEL*	27	27	30	30	30	31	32	36	40
57.4479	12B01 - 1.040.O.	1.040.O.	MG592424	VFGAAPAFHPPFLLVHTSPFLSNLNLINVMYIRKYA	12B01	MQDLVIFNVECYSNKNGEAFVSSNQLFIIGNGFDRWHQLPTSYENFYEQYRYYLDEIEHYFPYGLEGEELWSDFENTLGQFDESILIDENDFMDFSEDSFPTQQLYGLEDAVDEFSRGIVEAITSHFNEWIQGINLANLRPKVAFPETSQFISFNYTSTLQQVYETSENKVYHIHGSIGQQNRLIFGHNAPVEQATADEDTYYTDAINNGRKVLVALQKPINEIIEDKLTPWLESRRNISTISVIGHSLNNIDLPYFERIINEYPDARWQCYSFNRREAKTHKTILKKIGVPQNNIFVGTYKELVQHYSQ*	27	27	30	30	30	31	32	36	40
57.1192	10N.286.45.C1 - 1.080.O.	1.080.O.	MG592455	VAPFIRPLFLLVKSFFYHSYIPIVVKFKCLKCDVRAKR	10N.286.45.C1	MKLYIIGNGFDIHHKLDTYYTTFGLFLKDNNREVFELLVEHFGFSDLDPSNENSISDPLWSNFEHNLSLLDTVTVLEAFEDYLPDYSSDDFRDRDRYSFEIEMERVLDQLTTDLYACFKNFILSVRLATLEPKLAVNLDHEALYLTFNYTNTLNHYYGISDDNVLFIHEKAQEDEIELVLGHGVDPKNFEEQLAVPPAELSEEEYDEWCQYQADQYDYSYQRGKDMINRYFTTTFKGTGKIIDMNSKFFDSLSNVEEVLILGHSLADVDLPYFRKIVSSINPNIKWTVSYHVDEDRLKHLAKLKSIGVLDAVASRIENI*	25	25	28	28	28	29	30	34	38

## Sheet: ii_AbiU
Supplementary Data 2 (ii): Putative anti-defense proteins predicted by the deep-learning model for AbiU defense system
SCORE	Pair of bacterial and viral genomes	Virus ID	Virus accession	Anti-defense protein sequence, a.a.	Bacteria ID	Defense system protein sequence, a.a.	Anti-defense protein cluster number, 0 % identity	Anti-defense protein cluster number, 30 % identity	Anti-defense protein cluster number, 50 % identity	Anti-defense protein cluster number, 70 % identity	Anti-defense protein cluster number, 80 % identity	Anti-defense protein cluster number, 90 % identity	Anti-defense protein cluster number, 95 % identity	Anti-defense protein cluster number, 99 % identity	Anti-defense protein cluster number, 99,9 % identity
56.7642	10N.261.52.F1 - 1.217.O.	1.217.O.	MG592588	MGHSVEQWTNSIMAQMPRGILWQRSASLDLYKYAAGYAPRLEAVEVSADSLLLEMRPENTQQLLDEWEEYLGLPECQVQNQTFESRRAAVVEKYHRKGGLQAWNIDKLGADLGFEIEVEEIFPHHCLRGCTYPLYEEKYRHLLRIHVRGITQAYATCLDDCLTPLVSQTAAILECTLNQFKLGGKYYEFIYEESV	10N.261.52.F1	MDKITGSLLKSFTEQFELEKSQESTQFEHFANYSILSKQFRGSFDLDDLHSGSGGDCAIDGLYILVNGRLISDSDELREIVESSGHLDAEIGFIQTKTSSSFSGADMGSFIHGVKDFLSDNPKLVQNDIIQAKKVIWEDIILMSSYMVNRRPICKMYYVSTGKWVNDQNLCAVIDNGQSEIDALGMFEEVAFDPFGSSEIQKLYHETKNKLSSTVTFQNRITLPDIEGVSEGYLGVIPFKEYLKLIQDENKTIHSIFDDNVRDFQGSNAVNKKIKGTLEDAKFDIFCVLNNGVTVVASSITPAGNRFTIRDYQVVNGCQTSHILHDCQAIEGIEQVQVPIKIVVTGDEDIKASITLATNSQTEVKTEQLEALSVFQKQLELYYSAEKTTLPLYYERRSQ…	28	28	31	31	31	32	33	37	41
52.7167	10N.261.46.E12 - 1.062.O.	1.062.O.	MG592440	VFGAAPAFHPPFLLVHTSPFLSNLNLINVMYIRKYA	10N.261.46.E12	MSSDFSHGCRKMLMPSAVIQFTNRDNVYKPQLIQGFIGLIYMHSGILHKTLIHIIGKYMDRITKQLLSDFLATQEFKASKPESDFELFCNYAVISSEYNKTFDIQDVSVGAGDDTGIDGLGIIVNGHLVQDSNEVDDLMSQNGYLEVTYVFVQAKTSPSMDTKELNSFYNGIVDFFEENPKLRRNEEIQKFAELSNYILDLAPDFKENPKCKAYYIYTGSPKEDQNVEAIKDIYRDRIGDYNIFNSTDEYILGANDLSKLYRKTKNPVSVTFTFQNKVALPPIEHVDQAYYGYLPFTEFKKIIIDDNGNIRSVFDDNVRDFQGASNAVNQSISETLVSDTPTLFGVLNNGITIVADSIKTSANKFVISDYQIVNGCQSSNVLYENRNIEGIDDVCVPIR…	27	27	30	30	30	31	32	36	40

## Sheet: iii_Avs
Supplementary Data 2 (iii): Putative anti-defense proteins predicted by the deep-learning model for Avs defense system
SCORE	Pair of bacterial and viral genomes	Virus ID	Virus accession	Anti-defense protein sequence, a.a.	Bacteria ID	Defense system protein sequence, a.a.	Anti-defense protein cluster number, 0 % identity	Anti-defense protein cluster number, 30 % identity	Anti-defense protein cluster number, 50 % identity	Anti-defense protein cluster number, 70 % identity	Anti-defense protein cluster number, 80 % identity	Anti-defense protein cluster number, 90 % identity	Anti-defense protein cluster number, 95 % identity	Anti-defense protein cluster number, 99 % identity	Anti-defense protein cluster number, 99,9 % identity
100	10N.261.45.C7 - 1.063.O.	1.063.O.	MG592441	MTTLKSLHANLEVLEAQLIEAQQNLESAESIRDAIEIDVDEFEEEYKNSLDECNGEFMGYSASRILEELDPTAFRCGLNDYCDSKDVEDTQEWVEANEKVESVESEIEDLESSIEDLEEEIAELEEE	10N.261.45.C7	MKKISYLHYSDDETIDLLSSAFSNNNLVPVIGAGFTRGCQTGHSRTVPSGLDFKNEMINHLAECEEFDVDSIKKIQSKNFSAIAELYFNFVPKEKINYHLKSSFQNVKLDDIKKSFISDINWPYIYTLNADDAIERHSDYQVTHPYDSNLSERAKELPTLFKLHGDINYELRHDESRLVFQKKDYLKSLSSNKKMLDFLKLDLINKNVIYIGCSLSDELDISFLVAQENKSERKETRNIAFLSSKLDFVDEQEYLSVGIDTIITFEEGAYNQIYETLIKAYQDSGNNSNNLDIFKKPITVLDSDYGNNQDFLIKGLTELKNKDKLDKRVIPFYFGEREKGAQVLKSLKENEITILRGKRVSGKTLLAYHLLNQIKDKNIFIINSNQRLDNGSIVQLLGQ…	29	29	32	32	32	33	34	38	42
73.7621	ZF25 - 1.215.A.	1.215.A.	MG592585	MILASVAELRTRLNVSDKPVYNRVLTDILTNVTLGIETHLDTKFTRKEHKDVFFAGSNNYLVTGAPGRVVNGSPGVLYLLLSGLNVSNLTLSIGTTFSGSGSATNDYKLEERGIASLFNGWMPDDYITAVYQGGYETIDEETIPVYQGVPTLIKQAALMFAEHVYMLKYGDSQLDGSLPAGEDYTDPPNAVIQILYQYNRTAPHALRSLV	ZF25	MFQSGYGDSLLVRVSESGKRSANILVDLGFCYKDILKEIKGILGKELIDRFIITHFDSDHIQGACSLLEENGESSSPVHLKIDQVWLNSYRHLQFFDRSDEEISTVQRKRLTAYIASKSRAQSKEGNISAAQASRLASQVYKNNYEWNTDADGRAICIENIKTVALSNDVKLTVLTPNADNLRRQEKVFIADLRKVGLTPISDEIFDDAFELCIKELEEYSLPQEKNVSSSRSSMSIDSIVRYSEGHGYKPDDSIGNGGSISFILETENKKILFLADAYAEDVMREINNLYKDKEELPIYFDAIKISHHGSFRNNPPELFKLIDSKRFLFSTNGKHPKHKHPDIETIACIINRDLPIGLEKRILHFNYELEHLKGLDNEDLKNKFNYGIEVGTEVEIS*	30	30	33	33	33	34	35	39	43
68.8106	10N.222.49.A7 - 1.171.O.	1.171.O.	MG592538	MLHETLKHVAPLCDALEKNLEDFDGDASLLAHQSAELIVWTQTLQSLFDLEPSNPHKALTALDESIASLQAVRKHVFAAAEQRVLAGESVDGFTVSQGKATRSIPDYNAAVALLESAAGIPNSWLFENKPLGLPAIEKLLVAQKIKPDAREALLSQFVVVKEGKSKVVKV	10N.222.49.A7	MRIKMYPAENGDAFLISSDKTNILIDAGYARTFNSYIRQDLEEIASRGACLNLAIVTHIDADHIGGIIRFLLLNSHSETNNIVPVEGVWHNSLRSLTSLNETELSPQDCEVINAINRRGHPKELKATSNHDEISARQGSTLASLIHAGGYVWNDGSGSESVCINNVQHKRFQDGFVKVLTPSKERLDGLVKSWKRDLRRYGFVGSIGSDLAIDDAFELNFEHSSEGQARGNKLISAGRRKNLEDVYKPDNSPTNGSSIATVIELDGLRVLMLADAWAEEVLKELLKMKSQGESMMFDAIKISHHGSNYNTSPELLCTVDAPMYFISSNGSKHNHPDIELLRAIVDREASFTRTLYFNYSTPESREIKNFQTTTGATFIVEEEATNWIEITKE*	31	31	34	34	34	35	36	40	44
63.2507	10N.222.49.A7 - 1.267.O.	1.267.O.	MG592632	MAIVWLKLGCRCWCFYVGKRTPPPRSTRGVLMATGSY	10N.222.49.A7	MRIKMYPAENGDAFLISSDKTNILIDAGYARTFNSYIRQDLEEIASRGACLNLAIVTHIDADHIGGIIRFLLLNSHSETNNIVPVEGVWHNSLRSLTSLNETELSPQDCEVINAINRRGHPKELKATSNHDEISARQGSTLASLIHAGGYVWNDGSGSESVCINNVQHKRFQDGFVKVLTPSKERLDGLVKSWKRDLRRYGFVGSIGSDLAIDDAFELNFEHSSEGQARGNKLISAGRRKNLEDVYKPDNSPTNGSSIATVIELDGLRVLMLADAWAEEVLKELLKMKSQGESMMFDAIKISHHGSNYNTSPELLCTVDAPMYFISSNGSKHNHPDIELLRAIVDREASFTRTLYFNYSTPESREIKNFQTTTGATFIVEEEATNWIEITKE*	32	32	35	35	35	36	37	41	45
63.2464	10N.261.45.E10 - 1.215.A.	1.215.A.	MG592585	MPIYRCLLNGGGRCVGGTTLADARNTLNSKLYVIAGDVSEPVRVRHKTEGGKIYECYQLGEAKGIIISGYKGNPAPDFLD	10N.261.45.E10	MNFEAYDTPDTRSEFELRFHYLHNIIKQGKFHVNADISMDGILKVRKLPNGRIDFLSVNEQARLNANMMYHMRNFKLPDNIDLDEK*	33	33	36	36	36	37	38	42	46
60.4437	10N.286.45.A12 - 1.215.A.	1.215.A.	MG592585	MPIYRCLLNGGGRCVGGTTLADARNTLNSKLYVIAGDVSEPVRVRHKTEGGKIYECYQLGEAKGIIISGYKGNPAPDFLD	10N.286.45.A12	MINYLSEQILLAENGDEEAKKQCFNIIIQLWESRSVFPDGTRPFENFEPIFKALDSLSPETVMPRYFSNSYDGQENEQLGGSTSWVELAKHLDSAARTLITFIFEQAVEHAKNDNTKNWLQHVSGAVDSNEYQFIARFSDEIAPDKTEQRVQNLSNRIAKLEAFEKISKSIRQGLQEELRILETSRT*	33	33	36	36	36	37	38	42	46
57.568	10N.286.45.A12 - 1.171.O.	1.171.O.	MG592538	MLHETLKHVAPLCDALEKNLEDFDGDASLLAHQSAELIVWTQTLQSLFDLEPSNPHKALTALDESIASLQAVRKHVFAAAEQRVLAGESVDGFTVSQGKATRSIPDYNAAVALLESAAGIPNSWLFENKPLGLPAIEKLLVAQKIKPDAREALLSQFVVVKEGKSKVVKV	10N.286.45.A12	MINYLSEQILLAENGDEEAKKQCFNIIIQLWESRSVFPDGTRPFENFEPIFKALDSLSPETVMPRYFSNSYDGQENEQLGGSTSWVELAKHLDSAARTLITFIFEQAVEHAKNDNTKNWLQHVSGAVDSNEYQFIARFSDEIAPDKTEQRVQNLSNRIAKLEAFEKISKSIRQGLQEELRILETSRT*	31	31	34	34	34	35	36	40	44
53.6718	10N.222.54.A2 - 1.267.O.	1.267.O.	MG592632	MAIVWLKLGCRCWCFYVGKRTPPPRSTRGVLMATGSY	10N.222.54.A2	MIKTDWEIFKAKFSTNPQDAFEWMCYLLFCNEFRVKTGIFRYKNQSAIETNPISSNGVNIGWQAKFYATALSSHKNDILETITKAKRDYPDLNKIIFYTNSEWGQNKGKEPQGKIEAETKAKENNLEIEWRCCSFFESPFVVDDCSRFISYFFTQSDNLFGLLESFESHTGTILDDIETSIAFGDQDVSIDRSSIISEIEKSDTNALIISGEGGTGKTSLIKELYGNKGANDAFYVHKATEFSVSNLNEFLSGVFLKDFIEAHEGADNKTVVIDSAEHLIALENTAPIKEYLSSLIKAKWRVWFTTRNTYLDDLVFQLYEVYKISFKPIHLENLNEDTLFELAKKHDFVIPDDKKFKVLILTPFYLREYLRHYQENKGASYFEFKESLWPRVIAKRSPQ…	32	32	35	35	35	36	37	41	45
52.8049	10N.261.54.C7 - 2.117.O.	2.117.O.	MG592667	LKLIAFFSPIDLINPANRPIIKGWKGMVLFI	10N.261.54.C7	MEPITLAIGGASYYVAVKFVDQFISQEGYNWFQKLLFPKQSYVDRLYQLIEETASEFETEYPKDSDKIPFYQSQPLFDVLNEYVLFSELPDKSELVNRFNEYPNVLPPTQQQLERFYSILTLKINNCEKLKKLHYEENYKEKIFDISNEILQIKLILQSLDEKLTFHLSNDWLNEKNALAIADLGGRYTPELNLKLDIAKVFEGLGRTQAFSDIFYSHIDSFLIKGNKLHQCDEIATPLSAIAESLNSISNLYQETDISKLSEVPTNKFIDNVSRCQEAINESESVLWELREEAKKEGEANHFSDKYSSTLRELREFDYACNNLLTFITSITVKLANNPFLLLEGKAGIGKSHLLADVIKTRIASGHPSLFILGQQLTLDESPWSQIFKRLQLKVTSRE…	34	34	37	37	37	38	39	43	47
52.2524	10N.222.54.A2 - 1.171.O.	1.171.O.	MG592538	MLHETLKHVAPLCDALEKNLEDFDGDASLLAHQSAELIVWTQTLQSLFDLEPSNPHKALTALDESIASLQAVRKHVFAAAEQRVLAGESVDGFTVSQGKATRSIPDYNAAVALLESAAGIPNSWLFENKPLGLPAIEKLLVAQKIKPDAREALLSQFVVVKEGKSKVVKV	10N.222.54.A2	MIKTDWEIFKAKFSTNPQDAFEWMCYLLFCNEFRVKTGIFRYKNQSAIETNPISSNGVNIGWQAKFYATALSSHKNDILETITKAKRDYPDLNKIIFYTNSEWGQNKGKEPQGKIEAETKAKENNLEIEWRCCSFFESPFVVDDCSRFISYFFTQSDNLFGLLESFESHTGTILDDIETSIAFGDQDVSIDRSSIISEIEKSDTNALIISGEGGTGKTSLIKELYGNKGANDAFYVHKATEFSVSNLNEFLSGVFLKDFIEAHEGADNKTVVIDSAEHLIALENTAPIKEYLSSLIKAKWRVWFTTRNTYLDDLVFQLYEVYKISFKPIHLENLNEDTLFELAKKHDFVIPDDKKFKVLILTPFYLREYLRHYQENKGASYFEFKESLWPRVIAKRSPQ…	31	31	34	34	34	35	36	40	44

## Sheet: iv_BREX
Supplementary Data 2 (iv): Putative anti-defense proteins predicted by the deep-learning model for Brex defense system
SCORE	Pair of bacterial and viral genomes	Virus ID	Virus accession	Anti-defense protein sequence, a.a.	Bacteria ID	Defense system protein sequence, a.a.	Anti-defense protein cluster number, 0 % identity	Anti-defense protein cluster number, 30 % identity	Anti-defense protein cluster number, 50 % identity	Anti-defense protein cluster number, 70 % identity	Anti-defense protein cluster number, 80 % identity	Anti-defense protein cluster number, 90 % identity	Anti-defense protein cluster number, 95 % identity	Anti-defense protein cluster number, 99 % identity	Anti-defense protein cluster number, 99,9 % identity
100	10N.286.48.E2 - 1.215.A.	1.215.A.	MG592585	MILASVAELRTRLNVSDKPVYNRVLTDILTNVTLGIETHLDTKFTRKEHKDVFFAGSNNYLVTGAPGRVVNGSPGVLYLLLSGLNVSNLTLSIGTTFSGSGSATNDYKLEERGIASLFNGWMPDDYITAVYQGGYETIDEETIPVYQGVPTLIKQAALMFAEHVYMLKYGDSQLDGSLPAGEDYTDPPNAVIQILYQYNRTAPHALRSLV	10N.286.48.E2	MSWQEKLTNQMGLVEPVHYIVNDPDNLCFEPAIADLIEQAGAVLFSDTDPIALRLCFEEWLDSDERSALLIRVVDEKPSIPYDIEFSARRVDFDISEVITELDTSVLRALSPKDYEQLLSAVKIYGANKLNRNASLDFVLRHIYKIAPEIIQSETDLVRLIIRKHYLGIEMPLVIEERLIETLQVREQFGRWDFTRIVLDRTEFFAFLQQQWLLHLQRKAQRYEIKESSWPADELVVPFDDQDIKVFVDNLFADGILQAVDFDGLGKDDWEWVGVVADDESRDLLRVRQLLNKLSNQFIVQDLSLPEDSEQWEEIARELGVLNSLFHSLKGSDSYALNAELANLNAKVDGYFETWLQANFGKLINTPTTRFPKMLHKIPDWLNLKVCKGQKVCLLVMDG…	30	30	33	33	33	34	35	39	43
74.4204	10N.286.49.A11 - 1.056.O.	1.056.O.	MG592436	ADRYRPAPSTVLYEIHFLVVSPSHCNVSGVV	10N.286.49.A11	MIDDNNDSKATEVHHYHHFDNEENDISPQPDKSPLSQEEVIAQEIKDVRDVDLDDLMTTEFKGRVVRKDLTKQLKEGANVPVYVLEYLLGMYCSATDDDLIEAGMGRVKKILTDNYVRPDEAEKVKSLIRERGTHKVIDKISVKLNQKKDVYEASLSNLGIKDAVIPASMVKENEKLLTGGIWCIVTLSYFFEEGQKTSPFSVLGLKAIQMPSMNMDEVFNARRNFTMDQWLDLLLRSIGMEPTNLEQRAKWHILARMIPFVENNYNVCELGPRGTGKSHVYKECSPNSLLVSGGQTTVANLFYNMSSRQVGLVGMWDIVAFDEVAGIRFKDKDGVQIMKDYMASGSFSRGRDSIEAKASMVFVGNIDQSVETLVKTSHLLAPFPTEMIDSAFFDRFHA…	35	35	38	38	38	39	40	44	48
71.4621	10N.286.48.E2 - 1.141.A.	1.141.A.	MG592512	MPKKYMPYLINAAVAGATAYLVTKAAADNKTVVWYNPASWF	10N.286.48.E2	MFLIGAWAWSQAHQQYVKVIESSGLWGQSFYRVWLQQQDSVVKVPSGDLTNTSMDKSPSPHFFSYIGLAAKIANAQKEDILLAPVESNVIPLPHQLKALDKAMSRKQVRYLFADEVGLGKTIEAGLVMRELKLRGTAKRILVCAPKGLVSQWVSEMSTHFGESFYLLIPGENKPVDENDNVWLRHDLVVCPVDSIKPIESRKGWSVKQVHEYNKHRFDDLLSAGWDLIVIDEAHRLGGSTELVARYKLGQGLAQASPYLLLLSATPHQGKSDAFHRLMALLDKEAFPDVSSVTKERVQPYVVRTEKRISIDSTGKPLFKPRKTELIPVAWKSKHALQRHLYEEVTEYVKEGYNLAKAQKQNAIGFLMILMQRLVSSSSAAIAMTLSRRLQSLENTVIED…	37	37	40	40	40	41	42	45	49
67.8955	10N.286.45.A9 - 1.141.A.	1.141.A.	MG592512	MPKKYMPYLINAAVAGATAYLVTKAAADNKTVVWYNPASWF	10N.286.45.A9	MQTVQQLQQRLEQVQDRLESDEFLTNKELGGEIGFYIFDYPAEHEIIVREHIDFLTKKLASRSEITGKRFASINLYEMVVELLKSRKLLDRAYKMQFEKGDDALFKALKGPLEQNRFAEFIVKQANVLECDFIILHGLGSVWPIIRGHGLLNALHAKVGNVPTVMFYPGEYDGATLKPFGRIESNNYYRAFKLVP*	37	37	40	40	40	41	42	45	49
65.8471	5F97 - 1.141.A.	1.141.A.	MG592512	MPKKYMPYLINAAVAGATAYLVTKAAADNKTVVWYNPASWF	5F97	MQLLQQRLDTIQSRLESEGFLQNKELGGEIGFYIFDYKPEQELAVREHISVLEKKLTNRGYTFASINLFEMIVKLLESRRLLDKSFKMQFEKGDEALFKALKGPLEQNRVAEFIVQEANIENCDFIMLHGLGSVWPIVRGHGLLNALHAKVGQVPTVMFYPGEYDGASLKPFGRIESNNYYRAFKLA*	37	37	40	40	40	41	42	45	49
63.683	10N.286.49.A11 - 1.066.O.	1.066.O.	MG592443	MTKFLSHLMLATYQSNTHKFMSDGEMGKIYEVTHAHVSYSRKRLIKEGHSFAFNTSVTKSNMPVQTYKYVGQTNLGLVCVDEKKDAMDGDTLLRLRYRMQSPSVPARQFPVEPGHVSLLGISSLV	10N.286.49.A11	MIDDNNDSKATEVHHYHHFDNEENDISPQPDKSPLSQEEVIAQEIKDVRDVDLDDLMTTEFKGRVVRKDLTKQLKEGANVPVYVLEYLLGMYCSATDDDLIEAGMGRVKKILTDNYVRPDEAEKVKSLIRERGTHKVIDKISVKLNQKKDVYEASLSNLGIKDAVIPASMVKENEKLLTGGIWCIVTLSYFFEEGQKTSPFSVLGLKAIQMPSMNMDEVFNARRNFTMDQWLDLLLRSIGMEPTNLEQRAKWHILARMIPFVENNYNVCELGPRGTGKSHVYKECSPNSLLVSGGQTTVANLFYNMSSRQVGLVGMWDIVAFDEVAGIRFKDKDGVQIMKDYMASGSFSRGRDSIEAKASMVFVGNIDQSVETLVKTSHLLAPFPTEMIDSAFFDRFHA…	42	42	45	45	45	46	47	52	50
60.7773	10N.286.48.E2 - 1.057.O.	1.057.O.	MG592437	MSITDFFKIAGISLLTTYAINQSPFKRYFS	10N.286.48.E2	MFLIGAWAWSQAHQQYVKVIESSGLWGQSFYRVWLQQQDSVVKVPSGDLTNTSMDKSPSPHFFSYIGLAAKIANAQKEDILLAPVESNVIPLPHQLKALDKAMSRKQVRYLFADEVGLGKTIEAGLVMRELKLRGTAKRILVCAPKGLVSQWVSEMSTHFGESFYLLIPGENKPVDENDNVWLRHDLVVCPVDSIKPIESRKGWSVKQVHEYNKHRFDDLLSAGWDLIVIDEAHRLGGSTELVARYKLGQGLAQASPYLLLLSATPHQGKSDAFHRLMALLDKEAFPDVSSVTKERVQPYVVRTEKRISIDSTGKPLFKPRKTELIPVAWKSKHALQRHLYEEVTEYVKEGYNLAKAQKQNAIGFLMILMQRLVSSSSAAIAMTLSRRLQSLENTVIED…	36	36	39	39	39	40	41	46	51
55.6336	10N.286.49.A11 - 1.269.O.	1.269.O.	MG592635	MPYLYGERCLSVFYALNRFQISARLIVTGWSRCVSALSNALDQVLDEIIEIPLTIISISAKSRYIMYASLTLESKSTRNRYTCQHLIRVIY	10N.286.49.A11	MIDDNNDSKATEVHHYHHFDNEENDISPQPDKSPLSQEEVIAQEIKDVRDVDLDDLMTTEFKGRVVRKDLTKQLKEGANVPVYVLEYLLGMYCSATDDDLIEAGMGRVKKILTDNYVRPDEAEKVKSLIRERGTHKVIDKISVKLNQKKDVYEASLSNLGIKDAVIPASMVKENEKLLTGGIWCIVTLSYFFEEGQKTSPFSVLGLKAIQMPSMNMDEVFNARRNFTMDQWLDLLLRSIGMEPTNLEQRAKWHILARMIPFVENNYNVCELGPRGTGKSHVYKECSPNSLLVSGGQTTVANLFYNMSSRQVGLVGMWDIVAFDEVAGIRFKDKDGVQIMKDYMASGSFSRGRDSIEAKASMVFVGNIDQSVETLVKTSHLLAPFPTEMIDSAFFDRFHA…	50	50	53	53	53	55	56	61	66
52.8144	12G01 - 1.215.A.	1.215.A.	MG592585	MILASVAELRTRLNVSDKPVYNRVLTDILTNVTLGIETHLDTKFTRKEHKDVFFAGSNNYLVTGAPGRVVNGSPGVLYLLLSGLNVSNLTLSIGTTFSGSGSATNDYKLEERGIASLFNGWMPDDYITAVYQGGYETIDEETIPVYQGVPTLIKQAALMFAEHVYMLKYGDSQLDGSLPAGEDYTDPPNAVIQILYQYNRTAPHALRSLV	12G01	MSDRLSKLLTSFEKHISIPWPVAVSADERTIFLVYHKEDELKLRARVEEFEQACVKHNHPWQLLDLTHSFENWMSAQDYKETYFEDPEYLKGLYDDFADELVEELTNKVESNQTEDGVIALLGCGTLFGFASVSGVVESLAEKVTGRLVVFFPGEVQNNNYQLLDAKDGWGYHATAISATS*	30	30	33	33	33	34	35	39	43
51.2969	10N.261.45.E5 - 1.215.A.	1.215.A.	MG592585	MILASVAELRTRLNVSDKPVYNRVLTDILTNVTLGIETHLDTKFTRKEHKDVFFAGSNNYLVTGAPGRVVNGSPGVLYLLLSGLNVSNLTLSIGTTFSGSGSATNDYKLEERGIASLFNGWMPDDYITAVYQGGYETIDEETIPVYQGVPTLIKQAALMFAEHVYMLKYGDSQLDGSLPAGEDYTDPPNAVIQILYQYNRTAPHALRSLV	10N.261.45.E5	MNNTNEKLSLTLRPALIHESRIIAEQYVQFHDWELVREEVLTKNLLQARTESTSKTVYGEVSKRLKSLSNDELVLMKESDADVNHLVWLAICRQYPFTYQFAIEVLAERYSKSQFQLYPEDYTAFLNAKAEWHSNLDKITQQSRYKAQQIMFKMLVECGLVDESKVMMRQQISKELEELIKQSNADYLRIYPGDYS*	30	30	33	33	33	34	35	39	43
51.1724	10N.261.45.A3 - 1.057.O.	1.057.O.	MG592437	MPKKYMPYLINAAVAGATAYLVTKATADNKTVVWYNPASWF	10N.261.45.A3	MSDRLSKLLTSFEKHISIPWPVAVSADERTIFLVYHKEDELKLRARVEEFEQACVKHNHPWQLLDLTHSFENWMSAQDYKETYFEDPEYLKGLYDDFADELVEELTNKVESNQTEDGVIALLGCGTLFGFASVSGVVESLAEKVTGRLVVFFPGEVQNNNYQLLDAKDGWGYHATAISATS*	37	37	40	40	40	41	42	47	52

## Sheet: v_CBASS
Supplementary Data 2 (v): Putative anti-defense proteins predicted by the deep-learning model for CBASS defense system
SCORE	Pair of bacterial and viral genomes	Virus ID	Virus accession	Anti-defense protein sequence, a.a.	Bacteria ID	Defense system protein sequence, a.a.	Anti-defense protein cluster number, 0 % identity	Anti-defense protein cluster number, 30 % identity	Anti-defense protein cluster number, 50 % identity	Anti-defense protein cluster number, 70 % identity	Anti-defense protein cluster number, 80 % identity	Anti-defense protein cluster number, 90 % identity	Anti-defense protein cluster number, 95 % identity	Anti-defense protein cluster number, 99 % identity	Anti-defense protein cluster number, 99,9 % identity
100	10N.286.51.A4 - 1.196.O.	1.196.O.	MG592565	MAIVWLKLGCRCWCFYVGKRTPPPRSTRGVLMATGSY	10N.286.51.A4	MKEAQQSKLRILSLNGGGVRGLYTISVLAEFEHILAEGDESYSIAEHFDLIAGTSIGGLLALGLADGKTARELESKMREHASTIFPSRKYLPKFLWEAWKGCRAVFGNRYNGDNISKAVVDIVGADRKIRHLQRRILIPTVNVTTGKPLFVKTCHNPRFTRDDRLHLVDIARATSAAPTYFEPHYIEELNAYFVDGGLVANNPSYVAYHEAVTDLKEEFDIQSEDQIYVLNVGTMASEFCINPELIKSWIPGYFRLWGLGSTLVETVMNGNQWMHHFMTARALSKNNHVMLDDVVPDQQASIITLDNSRREALNVLAARGKQKATEAIADVNLNLRGKFFSDKAPKFVHPEDKKHANPA*	32	32	35	35	35	36	37	41	45
90.5473	10N.222.45.E4 - 1.068.O.	1.068.O.	MG592445	LLCVLPCGSPVQRRLCLTAWIITLCIVVSTWIRNRYTLIN	10N.222.45.E4	MNWNLHSYYTNRNTGLIGCLQLSDQEETNLKGLRALVRKRITVVFAEATQVAKELVKEFSTEDTLRVKLLNTKVRYLSEQERNEVARLIFGMDEDVMREFVGLKPRFWTQGSFQYNTLNRPFHSGQEMDIDDGTYLPMTIFESEPKIGHQLLTLLVDSALKSLVVENKSWEFESKRTCARIKIPTERTHIDVPMYAIPKDKFLDKQVALEAAAHNRNMYESVQKSVMDSDDTQYQKLDSENVNLALRDDKPGSAKWMNSDPKIVEDWFNEECRRIGKHTRKVCRFMKAWRDAQWDIGGPTSISLMAATVEVLNRVQHDTQDMGSIMKVVADNLYLEFINGVESPDDTDEKPLFPPQSEHTDRERDIVEKLKMLPSILRQAEQSETKALALATLSEAFGS…	38	38	41	41	41	42	43	48	53
90.008	10N.261.51.A10 - 1.196.O.	1.196.O.	MG592565	MAIVWLKLGCRCWCFYVGKRTPPPRSTRGVLMATGSY	10N.261.51.A10	MTVRRDFSVFLDNLKIKNKDTISSRYGSITKNLNEKFRGLENDKTNYSLQAGSYGRYSGIQGISDLDMLYILPSTAWHTYRKAPSKALDHAKDAIKKTYKTSKVKKDRNVVVVEMQDFTFEVVPVFEWQGVFKYPDTYNGGLWRKCNTRAELQAFRDLNTERKDNLRKLAKMIRAWKDRNDIQMSGFLIDTLCYNFFKDNTDYDQASFGSFDKIVKDFFQYLTKEPAKTYYNAFGSNSQVGIKTAFQADAQIARDNAIEAIEARESGYEEKCNQRYKSIFGTKFPNREAKQTAAVNEQFIEELFDLDITNQIIIDCEVKSDLMTKVLSSIKFVGDRIQHQRKLHFFVKQTDIGEDYEVKWKVRNRGYIADKNQNHRGEIIDDDGSKVRVETATFHGDHT…	32	32	35	35	35	36	37	41	45
85.184	062478 - 1.209.O.	1.209.O.	MG592579	MSKHRGKAKRRATWVQTKRSPKNKHRWETEVNRARRKLAYAEYHKMKNRRGRNYV	62478	MTKDDLLKAIAETGYNVGFGAKKHFATYDLVEKVPGWISFLSMVFGVYALAFDGLSTKFLSATFVVLGVVGLYVSFYNNEKEEYEKRAVKLTQLFNQLKALYLNTKSEQSQDLSIYISEHQRLETEYYSNCLTKQILFSDWYAHYKFFWQHQIEWIDEQKKFNFLRDKVPLSFSIVLVSAIVFAFLYRFEVLSSLCSLLNNG*	41	41	44	44	44	45	46	51	56
74.8955	10N.261.46.E9 - 1.267.O.	1.267.O.	MG592632	MAIVWLKLGCRCWCFYVGKRTPPPRSTRGVLMATGSY	10N.261.46.E9	MKLPTYIIVQTINWLFRKRSPALLVFRTGASFIPIALVGGMAFNVQYETATQLIKLDVAGSDVPTVLVFGGFALGTVLILIGLIWEVVRSIIEHRRLTKKLVFAIEQRGLVNTSDSPLSDYIQKKHKGKSISEIVIDIRDNLANGTVSQPALALKKCLNLEHSVAERRNSVSAKDFHIIYGGLVPIPFAFLSGYMLDDESKIEVLDWDRQLSSWKELDPINDDNEKFEKTTNHAGNKGSIILAVSFSYHVDEEAINLCFPNIPQVHLKLKEKRFDNHWSNKKQTRLAYDFIEEVKKIMEEGYDDIHLILASQNSVAFRFGQAYDRRNLPQITIYQYEKDRKIPYPWGVSISNSPNTDPSIKQIEFTDHLKQAV*	32	32	35	35	35	36	37	41	45
73.4134	10N.222.45.E4 - 1.072.O.	1.072.O.	MG592449	LLIAWVAGFVIAKGFWPTLFCVIPFWSFYLVVEKVMTVLGWL	10N.222.45.E4	MNWNLHSYYTNRNTGLIGCLQLSDQEETNLKGLRALVRKRITVVFAEATQVAKELVKEFSTEDTLRVKLLNTKVRYLSEQERNEVARLIFGMDEDVMREFVGLKPRFWTQGSFQYNTLNRPFHSGQEMDIDDGTYLPMTIFESEPKIGHQLLTLLVDSALKSLVVENKSWEFESKRTCARIKIPTERTHIDVPMYAIPKDKFLDKQVALEAAAHNRNMYESVQKSVMDSDDTQYQKLDSENVNLALRDDKPGSAKWMNSDPKIVEDWFNEECRRIGKHTRKVCRFMKAWRDAQWDIGGPTSISLMAATVEVLNRVQHDTQDMGSIMKVVADNLYLEFINGVESPDDTDEKPLFPPQSEHTDRERDIVEKLKMLPSILRQAEQSETKALALATLSEAFGS…	39	39	42	42	42	43	44	49	54
71.6789	10N.286.52.E8 - 1.068.O.	1.068.O.	MG592445	LLCVLPCGSPVQRRLCLTAWIITLCIVVSTWIRNRYTLIN	10N.286.52.E8	MFLQLLDFLYVICQKRLSSARYLMTSSLRLVLITAGVSFVINISHGDLNIVIDPYSSSIASMLTNLGYMIGILMFCVGCCIEIYERIKGEASSSKRAKSIDLRSLTNSPAPKLCDQFEMTIDQAGLHDELYLEQKSQEPTTDWLSRSCDRLGDFKLKKLSTMNTHEPMKPLSLGSLAHIPQCFTLGFLVGNRRLVNYYCWNRDKSRPQKGRWVDTRDARDRGVRLKDEFTLTFKDGQEASDVTKWGLSIEISFGNDHVNFMNDVGLDAVSKLEVKNKDVGNLFSEVAQVEIVSSIRNYINSTIPSFPNLKEIHLTITGQASFIMRLGGEFDQNHFQFIKKIHHFEQSSQSYPWCLVLDPASNSPVQFEEQ*	38	38	41	41	41	42	43	48	53
70.3721	10N.261.46.E7 - 1.267.O.	1.267.O.	MG592632	MAIVWLKLGCRCWCFYVGKRTPPPRSTRGVLMATGSY	10N.261.46.E7	MTNIIANQKSTEAIEAGTAFRFAYKKAKAWKAAIWSTTLLFAVVQTVASAYIFSNGTPEIDPTPYVVSLLLASVFAGSFGKQQVTKWINMGCTLQRLHDYLVMAVGVRPTHIELPKSKIIELGQKQIRSTPSDKQELENWWSTSLDKVPFSVAKVIATYSTFAWESELRKKYQALLTALLAASVASPIVLALLLNYTISQSIIFTIAPFTPFISVLLDEWITNRQNLNIANDLTKECHTSWRNIVSGKSSEHEIEKSTEQHMNFWQNFRQSATPIFEWIYHYSQRQMEMNMVVDTKELVKQYQDTL*	32	32	35	35	35	36	37	41	45
69.0957	10N.261.46.E7 - 1.037.O.	1.037.O.	MG592421	MLAIGSFIVMLLSAVWNWHSNRKRNQIIKENNEYTWKLKERELELRERELKLKEKGTQ	10N.261.46.E7	MTNIIANQKSTEAIEAGTAFRFAYKKAKAWKAAIWSTTLLFAVVQTVASAYIFSNGTPEIDPTPYVVSLLLASVFAGSFGKQQVTKWINMGCTLQRLHDYLVMAVGVRPTHIELPKSKIIELGQKQIRSTPSDKQELENWWSTSLDKVPFSVAKVIATYSTFAWESELRKKYQALLTALLAASVASPIVLALLLNYTISQSIIFTIAPFTPFISVLLDEWITNRQNLNIANDLTKECHTSWRNIVSGKSSEHEIEKSTEQHMNFWQNFRQSATPIFEWIYHYSQRQMEMNMVVDTKELVKQYQDTL*	40	40	43	43	43	44	45	50	55
69.0435	10N.222.45.F4 - 1.196.O.	1.196.O.	MG592565	MAIVWLKLGCRCWCFYVGKRTPPPRSTRGVLMATGSY	10N.222.45.F4	MNWNLHSYYTNRNTGLIGCLQLSDQEETNLKGLRALVRKRITVVFAEATQVAKELVKEFSTEDTLRVKLLNTKVRYLSEQERNEVARLIFGMDEDVMREFVGLKPRFWTQGSFQYNTLNRPFHSGQEMDIDDGTYLPMTIFESEPKIGHQLLTLLVDSALKSLVVENKSWEFESKRTCARIKIPTERTHIDVPMYAIPKDKFLDKQVALEAAAHNRNMYESVQKSVMDSDDTQYQKLDSENVNLALRDDKPGSAKWMNSDPKIVEDWFNEECRRIGKHTRKVCRFMKAWRDAQWDIGGPTSISLMAATVEVLNRVQHDTQDMGSIMKVVADNLYLEFINGVESPDDTDEKPLFPPQSEHTDRERDIVEKLKMLPSILRQAEQSETKALALATLSEAFGS…	32	32	35	35	35	36	37	41	45
68.1203	10N.261.46.E7 - 1.072.O.	1.072.O.	MG592449	LLIAWVAGFVIAKGFWPTLFCVIPFWSFYLVVEKVMTVLGWL	10N.261.46.E7	MTNIIANQKSTEAIEAGTAFRFAYKKAKAWKAAIWSTTLLFAVVQTVASAYIFSNGTPEIDPTPYVVSLLLASVFAGSFGKQQVTKWINMGCTLQRLHDYLVMAVGVRPTHIELPKSKIIELGQKQIRSTPSDKQELENWWSTSLDKVPFSVAKVIATYSTFAWESELRKKYQALLTALLAASVASPIVLALLLNYTISQSIIFTIAPFTPFISVLLDEWITNRQNLNIANDLTKECHTSWRNIVSGKSSEHEIEKSTEQHMNFWQNFRQSATPIFEWIYHYSQRQMEMNMVVDTKELVKQYQDTL*	39	39	42	42	42	43	44	49	54
67.9311	10N.222.51.E5 - 1.015.O.	1.015.O.	MG592399	MSKHRGKAKRRATWVQTKRSPKNKHRWETEVNRARRKLAYAEYHKMKNRRGRNYV	10N.222.51.E5	MNDRIDDLDKLYKPVETFNSITTLLFYIGAMLSIALPFFVGNLNESTIQLLTISYVLIVVLHAFSQNIASFYLLPRAEKERRKQLLSNALGVPLTHAETNLYYNNDNNAGLKRLHANLMENSFFGKNICLAMLRPERFKVAAYAILLLFALLYREAELGVLVILTQVFFTGGVLFNWVKLEILRIRNERIYESLYSLHLSHQDTSNGNGMATLLDIFSEYECAKSSASIKLNSKMFHDLNPSLTEEWNSIKTRIGL*	41	41	44	44	44	45	46	51	56
65.3256	10N.261.46.E7 - 1.066.O.	1.066.O.	MG592443	LLIAWVAGFVIAKGFWPTLFCVIPFWSFYLVVEKVMTVLGWL	10N.261.46.E7	MPTTVNSAFNQFMTDKVNLDSKKTTTARSSRDYLKGQVKGLTDFFPLYSDKDINFGSFARRTKIRPLDDIDMIFTLSAHGCTWEESFDGTVYINTPAESPEYKNFRHDNSYRLNSRKVINHFVSKLTELNHYSKAELHRNQNAATLKLTSYDWNFDIVPAFFTNEDADGKTFYIIPDGNGHWIKTDPRLDRQRVTDINQQCGGHVLNAIRAIKYWQRRATMPSMPSYLLENLVLNYFAEKGEASLFVDINIINVLQYIKDNIWWNVNDPKGIQGNLNTLSWDEKTKISRKAETDFNAALAAREFEKEEDHKKAIGEWRKVFGNDFPQYG*	39	39	42	42	42	43	44	49	54
65.2573	10N.261.45.C12 - 1.196.O.	1.196.O.	MG592565	MAIVWLKLGCRCWCFYVGKRTPPPRSTRGVLMATGSY	10N.261.45.C12	MQIVLPNSVLKKLRLHMLKAGKREIGGMLMGEDLGEQAFRIVDFSVDVKRGTTSSFFRDSDEHDLALQRFYEETGSDYKRFNYLGEWHTHPSFSVDPSINDINAMQGIVNGGENVDFAFLFISRLRWFWQFECSAYLFIRGHQPIQVEVIIEKK*	32	32	35	35	35	36	37	41	45
64.5304	10N.222.49.E4 - 1.267.O.	1.267.O.	MG592632	MAIVWLKLGCRCWCFYVGKRTPPPRSTRGVLMATGSY	10N.222.49.E4	MKQDVSRLLNDSKQGFIGNIEPHQSKMELLYETRREVRKELRIRFQDLSNSFRKKGDKWGLDIKPNVNFLETELRALDQDAYEVLANLTPKFAPQGSIVYKTMNKPCQPPQQMDLDDGIYLPIDMFEDKPVLSKDLFFKFVDGTLSDLARRKGWEFSDKKNTCSRVILGTDLHVDVPLYAIPRKRFLSMKVESLGLESINASMDVAPKYVRLEPNEVNLALRNTEAWTVSDPKLLNEYFSQNFSYYKDMSGTHVCRRVCRYLKAWRDKAFKTGGPSSVALMTCVVLTFQELAAQDRLRKLTDSVALDECVKRLALQLRNGVPNDAEPSKNEKLFPKSNMLEQELEDIYQKAELLNIHVTAGLNASTASEAITNLQAVFGDRIPNIPGLVVAITVAEAIR…	32	32	35	35	35	36	37	41	45
63.5367	10N.261.52.B10 - 1.209.O.	1.209.O.	MG592579	MSKHRGKAKRRATWVQTKRSPKNKHRWETEVNRARRKLAYAEYHKMKNRRGRNYV	10N.261.52.B10	MTVYRDFSLFLDNLKIKNKDTISSRYGSITKNLNEKFRGLANDKTNYSLQAGSYGRYSGIQGISDLDMLYIIPSDSWTTYRKDPSKALDHAKTAIQKTYKTSSIRKDRNVVVVEIQDFTFEVVPVFEWQGVFKYPDTYNGGQWRKCNTRAELRAFRELNNERNDNLRKLAKMTRAWKARNKVKMSGFLIDTLCYRFFTNNSNYDNASFGSFDMMVKDFFEFLSNEQKKKFYYAFGSNSKVYVYQPFQKAAKDALEAAEAAIDARAKGQDAKCNQCYKSIFGTKFPNREVTQIKAAQEQFIEDLFLMDLTNQIEIDCEVKDNLITRMLSTIRFGGGRIQHERKLHFFVKGSDITEDYEVKWKVRNRGHEADRQKNHRGQIMDDDGSKIRVETATFYGDHT…	41	41	44	44	44	45	46	51	56
63.4427	10N.261.45.E6 - 1.196.O.	1.196.O.	MG592565	MAIVWLKLGCRCWCFYVGKRTPPPRSTRGVLMATGSY	10N.261.45.E6	MTTSEMFQNFLGNLTIKNGQVISDRYGEITASLNKKFRDTESKTANSLQVGSYGRWTGIRGISDLDMLYIMPAGKWNDYKDGKQSKLLSDTRDAIKARYPKTEVKVDRLVVQVVYKDFMVEVQPVFEQPDRSFKYPDTYNRGSWKITKPKEEIEAMKEFVDQKNRNLRKLCKMGRAWKNKCGVAMGGLLIDTLAYNFLKSSTYYDDKSYTYYDWMCRDFFKYLADEPDKEFYAALGSRQRVAVKKKFQRKAKKAYELALEAIDAASESTRHNKWKSIFGRSFPAAENTHGAKAATAWRDTEQFIDDLYPLDVKYSLVLDCDVSQNGFRENTLRHMLAQRIPLLAKKKLLFTVTECFVPEPFTLKWKVLNQGAEAERRDCIRGQIIEDEGHGKRKETTSF…	32	32	35	35	35	36	37	41	45
63.096	10N.222.49.A2 - 1.196.O.	1.196.O.	MG592565	MAIVWLKLGCRCWCFYVGKRTPPPRSTRGVLMATGSY	10N.222.49.A2	MQTLNYRQNTPESINRLLAQKQVYTDAKTLQGWYLFLSIPVMMILNVLVKPLLLSKWVEEAWRFDLTNTIALFALILTFYELFYIKPTVAKLKEKAAKIQESFDCFVYGLEWNSVLCGEKICDTDVALYSSKFRKAQGNVNNYFDWYTPDISQLDKNQSMLACQKENLGWDIVQRKKFKKLVTFGAVLAFSISAVAGFYSEFKIQEFILSVIIPSLPAITYAISNHFDNLEAITNKESLKSATDNVSRFSSITTKHVRNIQNSIYLNRKDNSLIFDWFYDYERESMQRGISYASRQLVRRICFGRDSE*	32	32	35	35	35	36	37	41	45
62.4204	10N.261.52.B8 - 1.267.O.	1.267.O.	MG592632	MAIVWLKLGCRCWCFYVGKRTPPPRSTRGVLMATGSY	10N.261.52.B8	MSIQAKFLKFHDQIKISREDSAYKDAREKDDSILKDVKSALKDEGYPVIENFLQGSMSTATGVKNPKEDFDIDRAVVIAFDDSPSDPVEVKKIVLKVLEDRGFKNAKIKKPCVTADYTSKNLHIDIPIYRKANDAYELAIGKKNSSEENREWSGSDPKGLKDWINDSSDYYGSASKKLEQYKRLVRYLKRWRDNKFSSAVAKKIFSIGLTVMAKEQFTPSFDDSGKANDLIALRDTVDAIIRGTYFGYQGNEEYKVKAFLPKSPWRDIFDGSSKNTGTQFYNKLKSLRDNLDKAIDETDLVKQCEILNKIFGDDFEVPSSSSNLKKATYATSGAAGTSQGA*	32	32	35	35	35	36	37	41	45
62.3419	10N.261.51.E5 - 1.196.O.	1.196.O.	MG592565	MAIVWLKLGCRCWCFYVGKRTPPPRSTRGVLMATGSY	10N.261.51.E5	MSDNLLPSNAVRVLSLNGGGVRGLFTISVLAELERILEDSSNEKTIKIGDYFDLITGTSIGGLLALGLAEGKSARELKNVFYSKSDKIFPQHKWFNNLLKTIKKAFGATYKTGPLKEAIIEMIGESTTFNDLDRRVMIPTVNLSTGRPQFFKTPHNPDFTRDGPLKLVDAALATSAAPTYFEPYFCEDLKAYFVDGGLVANNPSFVGLHEVFGDMKSDFPDASYSDIHVLNVGTMGEEYALSPKLLRAKKGYLGMWGLGERLVLTTMTANQILHQFMLSRELSVHGAIGNYISLDSRVPNEAAGDITLDNSSIEALDNLASRGKQLANEEFAKDKRLELIFSKPAETFKSKARADTSNEKGTLA*	32	32	35	35	35	36	37	41	45
61.9746	10N.286.52.B5 - 1.196.O.	1.196.O.	MG592565	MAIVWLKLGCRCWCFYVGKRTPPPRSTRGVLMATGSY	10N.286.52.B5	MLTRLHISSFVGLTIIVWLLALWFQGMPVLNADFLKPFGTVVGVIALFVTLFNKYMWSWKIFKGWYVKRPDIRGTWKVELKSSWINPETGEEIPPIYGYAVIRQTLTFLSVRLMTKESRSVLVAHSIEQQEDDDLFKLVGVYRNEPKIELQGKRSEIHHGSFALEIHGSPVYELEGHYWTDRATKGGMQLTDRVDKLYDTYNQAEQEFGN*	32	32	35	35	35	36	37	41	45
60.0774	10N.222.54.E7 - 1.066.O.	1.066.O.	MG592443	LLIAWVAGFVIAKGFWPTLFCVIPFWSFYLVVEKVMTVLGWL	10N.222.54.E7	MNDRSTSCALSEQELALESQLRECYGRVVYSHKTHEKCSDILLSKLSLIKIWQIILSVVTTGGFATEIFDVWNLGVFVGGVASTILLVLNAYTKDYDLGELAQKHKHAANEIWLIREKYLSLLTDLKSRSIPLQQVKEERDRLMDDLHSVYAGSPSTNFKAYTKAQDALQNKEDMTFSDAEIDAFLPSELKRG*	39	39	42	42	42	43	44	49	54
60.0112	10N.261.46.F1 - 1.066.O.	1.066.O.	MG592443	LLIAWVAGFVIAKGFWPTLFCVIPFWSFYLVVEKVMTVLGWL	10N.261.46.F1	MNEKEHLKKNIADAAYNIIYGAKLNFSSYELSKYISTGVSAFSLAIGIISLAFVDLATKELSVALLLLGLLGLLVGKSPDSMVNLKNGAIKLTKYHDQLKILYYEVDLSPTTESIQTCLETIQNEAREFYSTEQLPFASWLAHHKLFNEHQSGWLCDALNLTLWKDKLPSTLKLLIKLIIIMFLVSILYCTFDYLGVYALLDKVFI*	39	39	42	42	42	43	44	49	54
59.9539	10N.286.49.A10 - 1.267.O.	1.267.O.	MG592632	MAIVWLKLGCRCWCFYVGKRTPPPRSTRGVLMATGSY	10N.286.49.A10	MFLQLLDFLYVICQKRLSSARYLMTSSLRLVLITAGVSFVINISHGDLNIVIDPYSSSIASMLTNLGYMIGILMFCVGCCIEIYERIKGEASSSKRAKSIDLRSLTNSPAPKLCDQFEMTIDQAGLHDELYLEQKSQEPTTDWLSRSCDRLGDFKLKKLSTMNTHEPMKPLSLGSLAHIPQCFTLGFLVGNRRLVNYYCWNRDKSRPQKGRWVDTRDARDRGVRLKDEFTLTFKDGQEASDVTKWGLSIEISFGNDHVNFMNDVGLDAVSKLEVKNKDVGNLFSEVAQVEIVSSIRNYINSTIPSFPNLKEIHLTITGQASFIMRLGGEFDQNHFQFIKKIHHFEQSSQSYPWCLVLDPASNSPVQFEEQ*	32	32	35	35	35	36	37	41	45
59.7923	10N.222.54.A2 - 1.196.O.	1.196.O.	MG592565	MAIVWLKLGCRCWCFYVGKRTPPPRSTRGVLMATGSY	10N.222.54.A2	MKFERELTYQDSNGHLVIITEHVLAVLEKYRQTEMQDTEAAGVLLGEERGQHIVITDLSKPGFGDLRQRNLVDRRGKHHQQKVDNCFQLSGGTVNYIGEWHTHPEDFPQPSQQDKSSWSAHLKGGATKIVLIVGIKDFWIGKMKGTRLSKLSSRR*	32	32	35	35	35	36	37	41	45
59.7482	10N.286.46.E8 - 1.068.O.	1.068.O.	MG592445	LLCVLPCGSPVQRRLCLTAWIITLCIVVSTWIRNRYTLIN	10N.286.46.E8	MQFLDVVLDFGYVICQKRLSSARLLIKTGISTLATTIGIGSIVAVLSYNGISLSTDSNEPVVSPLLINSAAAFGLLSLVMGLCLEFYERIWGEAAKINRSKSIDLRSLSKAHAPKLLDSFPLVIESSGIHNDLFLHQDANEPVDAWLKRSTEALSNFANIDLARMNEHERNNPLAIGAVAHIPHCFALGFLIANRRLTNYYCWYRDLDKTEKSRWVDCRDKRTRGKSIKEGITVFPSEDTANPEQITKLGLSIELSLPSDPKQFKQETGVDVVYQISFEKKSIGNLFSEKEQVKIVKEIRDLINNEILQTYRNVKEFHITIAAQCSFVMRLAADMNQNHFPEVIKVYHYEKSGYPWCFALSPNQDSVKFSISNNELEVTV*	38	38	41	41	41	42	43	48	53
58.2932	10N.222.55.B11 - 1.267.O.	1.267.O.	MG592632	MAIVWLKLGCRCWCFYVGKRTPPPRSTRGVLMATGSY	10N.222.55.B11	MALTVCAAFNSFMKDKVNLNSDRTKTARSSRNSLKDKINGLDDFFPLYSEKNIEFGSFARKTKIRPLDDIDMIFTLSANGCTWEEEYLTDTVYLTTPENSQEYRNFRHDDSYRLNSRKVINEFIRKLESVTQYQKAEIHRNQNAATLKLTSYDWNFDVVPAFFTTENSAGKTYYIIPDGNGNWIKTDPRIDRKRVTDINQTCDGKVLNVIRVIKYWQKRPSMPSMQSYLLENMVLDYFEAKGSASNYLDIDIINVFGYIKDAIWSNVNDPKGIQGNLNNLSYEDKKKISDKATSDYEVALGAFEFEKQKDQNKAINEWRRVFGTDFPTYG*	32	32	35	35	35	36	37	41	45
57.088	10N.286.45.A2 - 1.196.O.	1.196.O.	MG592565	MAIVWLKLGCRCWCFYVGKRTPPPRSTRGVLMATGSY	10N.286.45.A2	MDKVILKKDIAELAYNVTYGANRHFATFDIVSRLPAWIGFSSLAFGIVGLAFKVTTDLTSVVFILLSIAALFITMYEPKKTDYEKRGVHLTKLSGQLLSLYRKSETDELDILQEVNKEFLELKDAYYSDGGNIGQQILFSDVLAHYKMFGVKKQQNQWFVGELNLTLFRDKIPFFILLVSGLAVLVIVIFGLYKLFACQLISYIAQYSC*	32	32	35	35	35	36	37	41	45
53.6591	10N.286.52.E4 - 1.011.O.	1.011.O.	MG592396	MARYVKSKLTGVLYLITNYMEDDADDIIEYMHDQWGDHYELDPVPLPHEGGVKLYWCQVRQSLIHLKE	10N.286.52.E4	MNNKEFILEILKLCISKKLSKWAATMFILSGIAALTPQWWYGLANTLYFQVTQSNLKPFEESPTTGWVFIFIGLVLVFLNVWESKKARNKEILGIRHISVADIPPEAIKRDLPYIQRLWHYSELAVDHSDSYNGGILEDYNSVLRALNRIPDQLDGILQANSDTPLAYYGLTHIPLAFYLGYLLSDNKYHIQLYELNNTERRWNQLGSISSPLDLKNNKNELEENAASGNVIVTIGISYPVHPTEVDELEITNELARINIEALMPQRQLICSQEQIEQLCKVFRRSLEQIKNAYPNRDKTHIFYSGPVSLAFALGRVISERIDSEIVIHNYSVKESPKYSWSLSFNGSNPAHISKTTEKGEERDSIQYA*	11	11	11	11	11	11	12	14	16
53.2098	10N.261.52.C6 - 1.011.O.	1.011.O.	MG592396	MARYVKSKLTGVLYLITNYMEDDADDIIEYMHDQWGDHYELDPVPLPHEGGVKLYWCQVRQSLIHLKE	10N.261.52.C6	MISVEKVADYLNSKGFDCKVINFDKIDVISVELEIEHKQIELIHFPTSEITHLPTFLLMKPSDVGHLAHVLNINIHGTEFGSICVNDRDSVSVNFNMPLLAIEESLNRHIAILKRAMTEHDWNRKELLREFKSCWLNVCDFDDRPVLLTNDNGKLEEIDVYKPVNKQAFGVRSYYLAQSRDTDLAAVAKVYWQDSSARSLAGKAIILPLTQIDPAPLKKEHLAAWYLETLSKQRTDVLEKVRDNYGRWKTHEYWVIFNANVPSGRSWFCLSFKSKTKRKHSLPLTEEQLEHWTVKAVPIRLFNREAVLPRGGASLDLETSRVALVGAGSVGSEIAHKLSAAGVQNLDIYDDDIYQIDNLYRHILPEEYLSLHKSTGLSFHLARQFLWSKATHSIKRLLD…	11	11	11	11	11	11	12	14	16
53.0859	10N.286.51.B2 - 1.011.O.	1.011.O.	MG592396	MARYVKSKLTGVLYLITNYMEDDADDIIEYMHDQWGDHYELDPVPLPHEGGVKLYWCQVRQSLIHLKE	10N.286.51.B2	MPYTIPVSFDKFIERISITGNQADTAESRCQSIVSLLGKEFNILEAFPLGSLVSGTSLSGYADADVMLVLNYGMHAENKLPEEFLQLVRDKLSEYNTRMAKKNGQAVTLYFKTWPNVDIVPAYRVTDNGSIYCYKIPNANDNTWIETRPKIHINNMKKASEHKVHLIKMIKEWNRKHSSYLSSFHIEVMALSYDNFYSDYPWHIYQFFEHMHKKIQSYLPSPSGLSGYVDDYLSYSDRLEASNRIEAALGKTRDAWLAHYNNNDKDSIEKFGKIFGDRFPSYG*	11	11	11	11	11	11	12	14	16
53.0314	10N.222.54.A6 - 1.196.O.	1.196.O.	MG592565	MAIVWLKLGCRCWCFYVGKRTPPPRSTRGVLMATGSY	10N.222.54.A6	MLTRLHISSFLGLTIIVWLLALWFQGMPVLNVDFLKPFGTVVGVIALFVTLFNKYMWSWKIFKGWYVKRPDIRGTWKVELKSSWINPETGEETPPIYGYAVVRQTLTFLSVRLMTKESRSVLVAHSIEQQEDDDLFKLVGVYRNEPKIELQGKRSEIHHGSFALEIHGSPVYELEGHYWTDRSTKGGMQLTDRVKKLYDNYNQAEQEFGN*	32	32	35	35	35	36	37	41	45
52.792	10N.261.51.E5 - 1.066.O.	1.066.O.	MG592443	LLIAWVAGFVIAKGFWPTLFCVIPFWSFYLVVEKVMTVLGWL	10N.261.51.E5	MSDNLLPSNAVRVLSLNGGGVRGLFTISVLAELERILEDSSNEKTIKIGDYFDLITGTSIGGLLALGLAEGKSARELKNVFYSKSDKIFPQHKWFNNLLKTIKKAFGATYKTGPLKEAIIEMIGESTTFNDLDRRVMIPTVNLSTGRPQFFKTPHNPDFTRDGPLKLVDAALATSAAPTYFEPYFCEDLKAYFVDGGLVANNPSFVGLHEVFGDMKSDFPDASYSDIHVLNVGTMGEEYALSPKLLRAKKGYLGMWGLGERLVLTTMTANQILHQFMLSRELSVHGAIGNYISLDSRVPNEAAGDITLDNSSIEALDNLASRGKQLANEEFAKDKRLELIFSKPAETFKSKARADTSNEKGTLA*	39	39	42	42	42	43	44	49	54
52.5521	10N.222.55.A11 - 1.196.O.	1.196.O.	MG592565	MAIVWLKLGCRCWCFYVGKRTPPPRSTRGVLMATGSY	10N.222.55.A11	MRHQKIFTEFLTEVVNLNQARINKVTTTSASVEKYVKDHDDFKGIFRNTSPQGSYGHRTIIKPVKNKEFDADIVFFMDENDNWEPKDYITKLHQAFKGSSIYKDMVHYNTRCVYLDYSGDFHIDVVPCIVRVTETVLGNHTQYLIANRHTNEFELTDPESYKKWVADKNSVVGNNNLIKCIRLIKYLRDIKTTFSCKSILLTTLICNMVQDYEPNSELFKDIATTLKTIFTRLDDYLSFYDSMPEIVNPVRTEETFTRHWNEEKYTIFKTKIGDYRTWIEDAFDETDRTESIKKWRRVFGDSFHSVTKKSATAATYDEILGEASQPNFPIPPYCARHRWEEVESVGSVNLDVEYRNKNGVNPFARAVQQIIFGKNYSLKFTVTDDIPPNSDVYWQITNT…	32	32	35	35	35	36	37	41	45

## Sheet: vi_CRISPR
Supplementary Data 2 (vi): Putative anti-defense proteins predicted by the deep-learning model for CRISPR-Cas defense system
SCORE	Pair of bacterial and viral genomes	Virus ID	Virus accession	Anti-defense protein sequence, a.a.	Bacteria ID	Defense system protein sequence, a.a.	Anti-defense protein cluster number, 0 % identity	Anti-defense protein cluster number, 30 % identity	Anti-defense protein cluster number, 50 % identity	Anti-defense protein cluster number, 70 % identity	Anti-defense protein cluster number, 80 % identity	Anti-defense protein cluster number, 90 % identity	Anti-defense protein cluster number, 95 % identity	Anti-defense protein cluster number, 99 % identity	Anti-defense protein cluster number, 99,9 % identity
99	10N.286.46.A10 - 1.008.O.	1.008.O.	MG592394	MIISINNWSGGKVKIFNRTSGKVIRLEDGESETVETAAITSLIILRCILANSHLILFDIVNTD	10N.286.46.A10_contigs	MTKLSDLLAIEDEAVKLSALKKMFMPYTEDVCVEGYEKEALTILLNLSSSHQADRCSDWLDVARAKRHLKAAENLEASLDEIKWFHTHNLKFPDCRVKDQRIIAQPLVTTEAFISSAVLEQSLGWGHNSAVYRHTLWLLNPFRWQSQSVSLLSLVQQETPVWVELLKEFGLGANSLSRLKHTIEEQLPENSFPDSVSTYSKQLRFPWGDDYVSVTPVVSHAVQRELEVRSRSRESKLSFVSSSLPNSASIGNLCGSLGGHMKVLNYPLDVKPAQGGTLTESRKKSGRYFDDYQVTNAKICQVLNHLIGSEPSKTQKQRESARKVRSKILRKQIALWMLPLIELRDIVDAEPNQQKLKHDDTLVQAFLSLPESDLGSLASEFNCRLHLAFQNNRYAAKFA…	1	1	1	1	1	1	1	1	1
98.9315	10N.286.46.A10 - 1.125.O.	1.125.O.	MG592500	VFGAAPAFHPPFLLVHTSPFLSNLNLINVMYIRKYA	10N.286.46.A10_contigs	MTKLSDLLAIEDEAVKLSALKKMFMPYTEDVCVEGYEKEALTILLNLSSSHQADRCSDWLDVARAKRHLKAAENLEASLDEIKWFHTHNLKFPDCRVKDQRIIAQPLVTTEAFISSAVLEQSLGWGHNSAVYRHTLWLLNPFRWQSQSVSLLSLVQQETPVWVELLKEFGLGANSLSRLKHTIEEQLPENSFPDSVSTYSKQLRFPWGDDYVSVTPVVSHAVQRELEVRSRSRESKLSFVSSSLPNSASIGNLCGSLGGHMKVLNYPLDVKPAQGGTLTESRKKSGRYFDDYQVTNAKICQVLNHLIGSEPSKTQKQRESARKVRSKILRKQIALWMLPLIELRDIVDAEPNQQKLKHDDTLVQAFLSLPESDLGSLASEFNCRLHLAFQNNRYAAKFA…	27	27	30	30	30	31	32	36	40
98.7915	10N.261.48.B1 - 1.012.O.	1.012.O.	MG592397	MLHETLKHVAPLCDALEKNIEDFDGDASLLAHQSAELIVWTQTLQSLFDLEPSNPHKALTALDESIASLQAVRKHVFAAAEQRVLAGEDVEGFTVKAGKATRSIPDYNAAVMLLESAAGIPNSWLFENKPLGLPAIEKLLVAQKIKHEAREALLSQFVVVKEGKSKVVKV	10N.261.48.B1_contigs	MNQKVHAPYHFVPLSKWVYMPEWAHLVSHDHPFEDGHSGVIEYTLRNNSPLCVGSDKDGNLVKFARNPAGIPVIPGSSLKGMLRNVLDIAGFGKFNQFDDFKLSYRDISSKSAYLDLIANNKPVPGWINYDEESEKWVFHKCSVAKIHHEEIKERLGIAVSNEDNAIKRYQKLPLSSSMRADISAPKGMKKNRWAENIGKGSTEGHLVFTNPRVLGQGDKRSYNFSYFFFNRQGIATTDNIQQQVHNLFENHRSISEKVNGQELDQVDYLQRNKHPEYGIPVFALMMRGEVQSFGFANMPRVSYKHSSLDLVDNLASEHSEDSYFSLSELLFGTLREGGYGLKSRVMFSDATLTSKETSIASQPVVLNSPKPSFLAAYIEQPMASDYASYGYQNEKEVA…	31	31	34	34	34	35	36	2	2
98.1524	10N.261.52.C9 - 1.069.O.	1.069.O.	MG592446	MIISINNWSGGKVKIFNRTSGKVIRLEDGESETVETAAITSLIILRCILANSHLILFDIVNTD	10N.261.52.C9_contigs	MTKLSDLLTIEDEAVKQSALKKMFMPYTEDVCVDGCEKEALTILLNLSSSHQSDRCLDWLDVARAKRHLKAAENLDASLDEIKWFHTHNLKFPDCRVKDQRIVTQPLVTTEAFISSAVLEQRLGWAHNSAVYRHTLWLLNPFRWQSQSVSLLSLIQQETSVWLELLKGFGLGTKSLARLQNTMAEQLPENSFPDSVSTYSKQLRFPWGDDYVSVTPVVSHAIQSELEVRSRSQESKFSFVSSSLPNSASIGNLCGSLGGHMKVLNYPLDVKLAQGGTLTESRKKSGHYFDDYQVTNAKFCQVLNHLIGSEPSKTQKQRESARKVRSKILRKQIALWMLPLIELRDIVDADPNQQQLEGDDTLAQAFLALPESDLGSLANEFNRRLHLTFQNNRYAAKFA…	1	1	1	1	1	1	1	1	1
97.8198	10N.261.52.C9 - 1.125.O.	1.125.O.	MG592500	VFGAAPAFHPPFLLVHTSPFLSNLNLINVMYIRKYA	10N.261.52.C9_contigs	MTKLSDLLTIEDEAVKQSALKKMFMPYTEDVCVDGCEKEALTILLNLSSSHQSDRCLDWLDVARAKRHLKAAENLDASLDEIKWFHTHNLKFPDCRVKDQRIVTQPLVTTEAFISSAVLEQRLGWAHNSAVYRHTLWLLNPFRWQSQSVSLLSLIQQETSVWLELLKGFGLGTKSLARLQNTMAEQLPENSFPDSVSTYSKQLRFPWGDDYVSVTPVVSHAIQSELEVRSRSQESKFSFVSSSLPNSASIGNLCGSLGGHMKVLNYPLDVKLAQGGTLTESRKKSGHYFDDYQVTNAKFCQVLNHLIGSEPSKTQKQRESARKVRSKILRKQIALWMLPLIELRDIVDADPNQQQLEGDDTLAQAFLALPESDLGSLANEFNRRLHLTFQNNRYAAKFA…	27	27	30	30	30	31	32	36	40
97.7182	10N.261.45.E12 - 1.175.O.	1.175.O.	MG592542	MTNQQRIALAIPAAITFAIWFDFYLKLASLHQ	10N.261.45.E12_contigs	MTKRYYFLIRYTPAHADYGLLAGRCISQMHLFMVNNRQAMNKIGVSFPDWSDVTVGQTIAFVAEDKEMMIGLSFQPYFSLMVNEGLLEISSVTEVPDNALEVRFTRNQTIGKSFLGSKKRRIKRSMARAELLDAEPSLPVTNEERVIDSFHRIPISSGSSAQDYILFVQKESVGERGTANFNSYGLATNQEKEGTVPELHF*	2	2	2	2	2	2	2	3	3
97.5311	10N.261.48.E3 - 1.012.O.	1.012.O.	MG592397	MLHETLKHVAPLCDALEKNIEDFDGDASLLAHQSAELIVWTQTLQSLFDLEPSNPHKALTALDESIASLQAVRKHVFAAAEQRVLAGEDVEGFTVKAGKATRSIPDYNAAVMLLESAAGIPNSWLFENKPLGLPAIEKLLVAQKIKHEAREALLSQFVVVKEGKSKVVKV	10N.261.48.E3_contigs	MQHVLLAVSGMTPQIITETLYGIHKKTPQKMPSKVVVMTTSSGEDRLLSALTGENNHLDQFCLDYGYDPISLEIKVPQVGGQKLIDVRTDQEQQIVADFITDHVRQHSKQTDIAIHASLAGGRKTMGFTLGYAMSLFGRPQDCLSHVLVNEPYESVPDFYYPTPTTVLRSDWSKQTRHDLSLAEVTLGEIPLVLMREELPSALIERDSVSYTQTVNRVNEANLLNFDTIAVELDYRDHSITCNGYKVELTLEQFVFYAWIAMDSKEYHIDGVKDGIAPPRKNMSKRELLQRLTEWMLSAFPEHERDKLKALPEDHLLDLIDERYQGDIFLFQRKGAQDLFDIDGLTSQSVVHKKQYSLWVRLLSEVNGAIEGELGSRFGGHYKIQEVNNIKIKELKKPI…	31	31	34	34	34	35	36	2	2
97.1088	10N.261.51.E6 - 1.034.O.	1.034.O.	MG592418	MGHKVAKCIFYDEASNIVFSAHGRPAKNMFIPVPQRGDWSDGMPKLYGAFSAGAIDRRREGITVHYRCAGFIKAASVPGLVSRVPWLKL	10N.261.51.E6_contigs	MKTDIQLYPDESLESFLLRLSQEQGYERFSQFAEDIWFDTMEQHEAIPGAFPLELDRVNIYHAQTTSQMRVRVLFHLENQLKLNNFGLLQLALSHSKARFSPDYKAVHRFDSDYPYSFLRARYTPICSLCISEAPYIRQQWHFVTHQACERHGCKLVHFCPECNSKLEYQSSERIGLCECGFELRNSPVEEASEAEIVIARWLSGNDSTTLGGLNLEMSLSERYGFLLWYVNRYGDIDDVSFESFIAYCESWPTALWEDLDALKEKSELVRVKGWKKMFFTEVFGALLKDCRQLPSRQLNHNIVLTQVLAYFTKLITKEPSSTKGNLGDILLSSLEVSTLLTCTTDEVYRLYEFGEIKAALRPRIHTKIASHESAFTLRSVIETKLSRMSSESDGLCVY…	4	4	4	4	4	4	4	5	4
96.7965	10N.222.51.C2 - 1.034.O.	1.034.O.	MG592418	MGHKVAKCIFYDEASNIVFSAHGRPAKNMFIPVPQRGDWSDGMPKLYGAFSAGAIDRRREGITVHYRCAGFIKAASVPGLVSRVPWLKL	10N.222.51.C2_contigs	MELCTQLNYVRSLSAGKAYFYHLSKSGEMCPLEIDRTWLRAPKGGYAEAYKGGNKFVAKNVAPQDLAYANPQFIEECYVKPGVDDIYCAFSLRIRANSLNPDVCSDDEVRYKLSSLAKTYKELNGYSELAYRYAKNILLGTWVWRNRECRKLTIEVKTSDSETVVIENATRLSWYGHWDEASTECLEKLTAYLKQALSDPSEYFYMDVKAKIGVGWGDEVYPSQEYLDSREDGVPTKQLATIELTSGKETVAFHGQKVGAALQSIDDWWHEEADKPLRVNEYGADREYVIARRHVTLKNDFYQLLRNTENWIESMAASQTIPNDVHFIMSVLIKGGLFNRSKSKPKAK*	4	4	4	4	4	4	4	5	4
95.9632	10N.222.49.A5 - 1.139.B.	1.139.B.	MG592511	MTEHPQMSCLLSAKLDWHDTGAYGKWTRQQQVIKLSTRLWQQTGMDISLYPAAVLTTKVRVPGAGNVLQLRYEGEPGKPFKFIGVDMTFRANREK	10N.222.49.A5_contigs	MTTYLVTRHPATVDWILQQGIQVDINLEHLACLDQIKAGDVVIGVLPITIVCQLNELGAEYIHFGLNVPREFRGKEISLEDLERFSPRLETFFVQRGS*	3	3	3	3	3	3	3	4	5
95.8745	10N.261.51.E6 - 1.139.B.	1.139.B.	MG592511	MGHKVAKCIFYDEASNIVFSAHGRPAKNMFIPVPQRGDWSDGMPKLYGAFSAGAIDRRREGITVHYRCAGFIKSTSVPGLVSRVPWLKL	10N.261.51.E6_contigs	MKTDIQLYPDESLESFLLRLSQEQGYERFSQFAEDIWFDTMEQHEAIPGAFPLELDRVNIYHAQTTSQMRVRVLFHLENQLKLNNFGLLQLALSHSKARFSPDYKAVHRFDSDYPYSFLRARYTPICSLCISEAPYIRQQWHFVTHQACERHGCKLVHFCPECNSKLEYQSSERIGLCECGFELRNSPVEEASEAEIVIARWLSGNDSTTLGGLNLEMSLSERYGFLLWYVNRYGDIDDVSFESFIAYCESWPTALWEDLDALKEKSELVRVKGWKKMFFTEVFGALLKDCRQLPSRQLNHNIVLTQVLAYFTKLITKEPSSTKGNLGDILLSSLEVSTLLTCTTDEVYRLYEFGEIKAALRPRIHTKIASHESAFTLRSVIETKLSRMSSESDGLCVY…	4	4	4	4	4	4	4	5	6
95.7027	10N.261.48.C6 - 1.209.O.	1.209.O.	MG592579	MTEHPQMSCLLSAKLDWHDTGAYGKWTRQQQVIKLSTRLWQQTGMDISLYPAAVLTTKVRVPGAGNVLQLRYEGEPGKPFKFIGVDMTFRANREK	10N.261.48.C6_contigs	MNQKVHAPYHFVPLSKWVYMPEWAHLVSHDHPFEDGHSGVIEYTLRNNSPLCVGSDKDGNLVRFARNPAGIPVIPGSSLKGMLRNVLDIAGFGKFNQFDDFKLSYRDISSKSAYLDLIANNKPVPGWINYDEESEKWVFHKCSVAKIHHEEIKERLGIAVSNEDNAIKRYQKLPLSSSMRADISAPKGMKKNRWAESIGKGSTEGHLVFTNPRVLGKGDKRSYNFSYFFFNRQGIATTDNIQQQVHNLFENHRSISEKVNGQELDQVDYLQRNKHPEYGIPVFALMMRGEVQSFGFANMPRVSYKHSSLDLVDNLAKEHGEDSYFSLSELLFGTLREGGYGLKSRVMFSDATLTSKETSITSQPVVLNSPKPSFLAAYIEQPMASDYASYGYQNEKEVA…	3	3	3	3	3	3	3	4	5
95.6459	10N.286.49.E9 - 1.162.O.	1.162.O.	MG592530	MSFYKSLIQVQSTLNAPKNQRNNFGKYNYRSCEDIMQAVKPLLASHNLVQFVSDEIELVGERYYVKATVTVTDGTNTHSVSAYAREPIEQKGMSDSQLTGTASSYARKYALNGMYNIDDSKDADTNEFRQQATQQAQKKQTAVNFDEVLEGFEVAADKAKTEEELKQLFAPAYKTLSASKTHQAKAKNHYDIRKSEIQVGEM	10N.286.49.E9_contigs	MQHVLLAVSGMTPQIITETLYGIHKKTPQKMPSKVVVMTTSSGEDRLLSALTGENNHLDQFCLDYGYDPISLEIKVPQVGGQKLIDVRTDQEQQIVADFITDHVRQHSKQTDIAIHASLAGGRKTMGFTLGYAMSLFGRPQDCLSHVLVNEPYESVPDFYYPTPTTVLRSDWSKQTRHDLSLAEVTLGEIPLVLMREELPSALIERDSVSYTQTVNRVNEANLLNFDTIAVELDYRDHSITCNGYKVELTLEQFVFYAWIAMDSKEYHIDGVKDGIAPPRKNMSKRELLQRLTEWMLSAFPEHERDKLKALPEDHLLDLIDERYQGDIFLFQRKGAQDLFDIDGLTSQSVVHKKQYSLWVRLLSEVNGAIEGELGSRFGGHYKIQEVNNIKIKELKKPI…	5	5	5	5	5	5	5	6	7
95.2346	10N.222.51.C2 - 1.139.B.	1.139.B.	MG592511	MGHKVAKCIFYDEASNIVFSAHGRPAKNMFIPVPQRGDWSDGMPKLYGAFSAGAIDRRREGITVHYRCAGFIKSTSVPGLVSRVPWLKL	10N.222.51.C2_contigs	MELCTQLNYVRSLSAGKAYFYHLSKSGEMCPLEIDRTWLRAPKGGYAEAYKGGNKFVAKNVAPQDLAYANPQFIEECYVKPGVDDIYCAFSLRIRANSLNPDVCSDDEVRYKLSSLAKTYKELNGYSELAYRYAKNILLGTWVWRNRECRKLTIEVKTSDSETVVIENATRLSWYGHWDEASTECLEKLTAYLKQALSDPSEYFYMDVKAKIGVGWGDEVYPSQEYLDSREDGVPTKQLATIELTSGKETVAFHGQKVGAALQSIDDWWHEEADKPLRVNEYGADREYVIARRHVTLKNDFYQLLRNTENWIESMAASQTIPNDVHFIMSVLIKGGLFNRSKSKPKAK*	4	4	4	4	4	4	4	5	6
94.6675	10N.286.49.E9 - 1.034.O.	1.034.O.	MG592418	MGHKVAKCIFYDEASNIVFSAHGRPAKNMFIPVPQRGDWSDGMPKLYGAFSAGAIDRRREGITVHYRCAGFIKAASVPGLVSRVPWLKL	10N.286.49.E9_contigs	MQHVLLAVSGMTPQIITETLYGIHKKTPQKMPSKVVVMTTSSGEDRLLSALTGENNHLDQFCLDYGYDPISLEIKVPQVGGQKLIDVRTDQEQQIVADFITDHVRQHSKQTDIAIHASLAGGRKTMGFTLGYAMSLFGRPQDCLSHVLVNEPYESVPDFYYPTPTTVLRSDWSKQTRHDLSLAEVTLGEIPLVLMREELPSALIERDSVSYTQTVNRVNEANLLNFDTIAVELDYRDHSITCNGYKVELTLEQFVFYAWIAMDSKEYHIDGVKDGIAPPRKNMSKRELLQRLTEWMLSAFPEHERDKLKALPEDHLLDLIDERYQGDIFLFQRKGAQDLFDIDGLTSQSVVHKKQYSLWVRLLSEVNGAIEGELGSRFGGHYKIQEVNNIKIKELKKPI…	4	4	4	4	4	4	4	5	4
92.2295	10N.261.48.E3 - 1.209.O.	1.209.O.	MG592579	MGHKVAKCIFYDEASNIVFSAHGRPAKNMFIPVPQRGDWSDGMPKLYGAFSAGAIDRRREGITVHYRCAGFIKSTSVPGLVSRVPWLKL	10N.261.48.E3_contigs	MQHVLLAVSGMTPQIITETLYGIHKKTPQKMPSKVVVMTTSSGEDRLLSALTGENNHLDQFCLDYGYDPISLEIKVPQVGGQKLIDVRTDQEQQIVADFITDHVRQHSKQTDIAIHASLAGGRKTMGFTLGYAMSLFGRPQDCLSHVLVNEPYESVPDFYYPTPTTVLRSDWSKQTRHDLSLAEVTLGEIPLVLMREELPSALIERDSVSYTQTVNRVNEANLLNFDTIAVELDYRDHSITCNGYKVELTLEQFVFYAWIAMDSKEYHIDGVKDGIAPPRKNMSKRELLQRLTEWMLSAFPEHERDKLKALPEDHLLDLIDERYQGDIFLFQRKGAQDLFDIDGLTSQSVVHKKQYSLWVRLLSEVNGAIEGELGSRFGGHYKIQEVNNIKIKELKKPI…	4	4	4	4	4	4	4	5	6
90.6206	10N.286.48.A6 - 1.049.O.	1.049.O.	MG592431	MVPILLSSPQYRKINNMANKNVFTGYFRAIFPHLATPRGNPQKPTDPAKYQITALFPQNGITTITGTPESGLDSLLGALDELCRQEFQVDWATLSANHVAYGIQYPPKFNDGNQDYLKDDNGNPLQPFQTRPESAGMWKISFKNSDPVDCVAPSGVDNIAPSEIYGGCWCRAEVQVSAYVNKNKQKVIAIKLINIQKAFDDQPLGGGAEPKKAGTQSFAQMAVAGTNIAPGTGVVHGAVAQPGALPAPGAQADTHIINPTLAAQGHTLESMMQAGWDLVAMIGAGHAIANPAAQAPAPQQMAAQAPAPQQMAAPQQQAPAPAPGMAPAPQQPGMAPAPQQPGMAPAPQQPGMAPAPQQQAPAPAPAPQQQAPAPAPGMAPAPNQMAPAPNQMAPTPGAQ…	10N.286.48.A6_contigs	MKLPKHLAYQASIDPSDVIFLVVWPDGSKTPLKIHSRKINGLKEGSASAYRDNGDIDTTINTAQLAEGNIHEIDFCNIPFGAKALECLFSVSFIPKLLEPYKCSDDQVKQQLSKLLSLYTKKIGLKELITRYLINICNGSWLWENSSRAYSTDIEITPWPWDHGPLVFENIRKKYPDSNIFRDEKHWSELVQLITNTLTTSNELCVLEVKATMQFPTCATIRPSQAFKESAKREKNRVYQSTEINDQTSPIFGCFKTGAAIAMIDDWYPNAEKMIRVGHYGVDKHNTMCYRAPETGKDLFSLLKRSDEFVDTLNSEEIMTNETIKDLHFVVANLIKGGLFQQKGS*	6	6	6	6	6	6	6	7	8
90	10N.286.48.A6 - 1.050.O.	1.050.O.	MG592432	MVPILLSSPQYRKINNMANKNVFTGYFRAIFPHLATPRGNPQKPTDPAKYQITALFPQNGITTITGTPESGLDSLLGALDELCRQEFQVDWATLSANHVAYGIQYPPKFNDGNQDYLKDDNGNPLQPFQTRPESAGMWKISFKNSDPVDCVAPSGVDNIAPSEIYGGCWCRAEVQVSAYVNKNKQKVIAIKLINIQKAFDDQPLGGGAEPKKAGTQSFAQMAVAGTNIAPGTGVVHGAVAQPGALPAPGAQADTHIINPTLAAQGHTLESMMQAGWDLVAMIGAGHAIANPAAQAPAPQQVAAQAPAPQQMAAPQQQAPAPAPAPGMAPAPQQPGPCTCTCTGYGTCTTATGYGTCTTATGTSTSTCTTATGTSTCTGYGTSPKPNGTSPKPNGTYTGC…	10N.286.48.A6_contigs	MKLPKHLAYQASIDPSDVIFLVVWPDGSKTPLKIHSRKINGLKEGSASAYRDNGDIDTTINTAQLAEGNIHEIDFCNIPFGAKALECLFSVSFIPKLLEPYKCSDDQVKQQLSKLLSLYTKKIGLKELITRYLINICNGSWLWENSSRAYSTDIEITPWPWDHGPLVFENIRKKYPDSNIFRDEKHWSELVQLITNTLTTSNELCVLEVKATMQFPTCATIRPSQAFKESAKREKNRVYQSTEINDQTSPIFGCFKTGAAIAMIDDWYPNAEKMIRVGHYGVDKHNTMCYRAPETGKDLFSLLKRSDEFVDTLNSEEIMTNETIKDLHFVVANLIKGGLFQQKGS*	6	6	6	6	6	6	6	7	9
90	10N.261.52.C9 - 1.067.O.	1.067.O.	MG592444	MASRGVNKVILIGSLGNDPEMKYLPSGGAVANISIATSESWRDKATGEQKEKTEWHRIAIFGKLAEIAGEYLRKGSQVYIEGQLQTRKWQDQSGQDRYTTEIVVQGFNGVMQMIGGKSDNQGSNQPQQQYQQQQQQQQQQQQGYQQPQQGYQNNKNNEPPY	10N.261.52.C9_contigs	MKTDIQLYPDESLESFLLRLSQEQGYERFSHFAEDIWFDTMDQHEAIAGAFPLELNRVNIYHAQTTSQMRVRVLIHLENQLKLNNFGVLRLALSHSKAQFSPQYKAVHRFGVDYPYAFLRKRFTPICPLCIDEAPYIRQQWQFISHQACEHHGCKLIHHCPECKSRLEYQSTEIISQCECGFELRNSPVEDAPEVEVLVAQWLSGNDSKPLGLLKGEMTLSERYGFLLWYVNRYGNIDDFSFESFIEYCGSWPTALWQDLDALKEKAELVRIKDWKKMFFNEAFGALLKDCRQLPSRQLSHNIVLTQVLAYFTKLIATVPSSAKGNVGDVLFSPLEASTLLSCTTDEVYRLYEFGEIKAAIRPRMHTKIASHESAFTLRSVIETKLTRMSSESDGLSVY…	7	7	7	7	7	7	7	8	10
89.8921	10N.286.49.E9 - 1.207.B.	1.207.B.	MG592577	MAQLNFNAQQVAPQQAFDALPSGWYKARIVESGFKPTKAGNGKFLELTIEIAEGQFANRKVWDRLNLENPNPVAVEIAQSTLSAICHATGVIQLQDSQQLHGIVMDVKLSFVAATAERDASNDVKGYRALQAGAGGQQTPVQQQQAPVQQQQAPVQQQQQAPVQQQQQQWNAQQQPQQQQQVQQQPVQQQQPVQQQQPVQQQQQQPVQQQPIQQQGVQQQPQQQADETVPPWMQNQQ	10N.286.49.E9_contigs	MQHVLLAVSGMTPQIITETLYGIHKKTPQKMPSKVVVMTTSSGEDRLLSALTGENNHLDQFCLDYGYDPISLEIKVPQVGGQKLIDVRTDQEQQIVADFITDHVRQHSKQTDIAIHASLAGGRKTMGFTLGYAMSLFGRPQDCLSHVLVNEPYESVPDFYYPTPTTVLRSDWSKQTRHDLSLAEVTLGEIPLVLMREELPSALIERDSVSYTQTVNRVNEANLLNFDTIAVELDYRDHSITCNGYKVELTLEQFVFYAWIAMDSKEYHIDGVKDGIAPPRKNMSKRELLQRLTEWMLSAFPEHERDKLKALPEDHLLDLIDERYQGDIFLFQRKGAQDLFDIDGLTSQSVVHKKQYSLWVRLLSEVNGAIEGELGSRFGGHYKIQEVNNIKIKELKKPI…	8	8	8	8	8	8	8	9	11
89.8727	10N.222.49.A8 - 2.117.O.	2.117.O.	MG592667	MAQLNFNAQQVAPQQAFDALPSGWYKARIVESGFKPTKAGNGKFLELTIEIAEGQFANRKVWDRLNLENPNPVAVEIAQSTLSAICHATGVIQLQDSQQLHGIVMDVKLSFVAATAERDASNDVKGYRALQAGAGGQQTPVQQQQAPVQQQQAPVQQQQQAPVQQQQQQWNAQQQPQQQQQVQQQPVQQQQPVQQQQPVQQQQQQPVQQQPIQQQGVQQQPQQQADETVPPWMQNQQ	10N.222.49.A8_contigs	MDSTNCHYYPDESLESCLLRLSQHEGYERFSYFAEDIWFDTMDQHEAIPGAFPFDLNRVNIYHAQTTSQMRVRVLIHLERTLSLNNFGVLRLALSHSIALFSPEYKAVHRFGSDYPYAFLRKRFTPICPQCIGEAPYIRQQWHFISHQSCEHHGCKLVHNCPECNLRLEYQNTERIGQCECGFELCESPMETAPEAELQVARWLSGSDIDDWAGMKPNMTQSERYGFLLWYVNRYGDSEDISFDAFVEYCACWPKLFWGELDELVKKSDVIRVKDWRKMFFHEAFDALLKECRQLPSRQLGHNIVLAQILAYFTKLMAAVPATARGNLGDVLLSPLEVSTLLSCTTDEVYRLYEFGELKATIRPRMHTKIASHESAFTLRSVIEIKLTRMCSENDGLSV…	8	8	8	8	8	8	8	9	11
88.8941	10N.286.55.C1 - 1.039.O.	1.039.O.	MG592423	MAISITGKLNKAANQFQAGESTGFGVRLGVRYYDRETKQNEYTNYEAVIFAKAPTQVQFYQQALVEGSVIELSGTTQKIKSFDGQNGQVLSIEIHDAKLGFVHTGNQPQQQQQAPQQQYQQPPQQQYNAPQQQGYQQPQQGYQNNPNNEPPF	10N.286.55.C1_contigs	MKTDIQLYPDESLESFLLRLSQEQGYERFSHFAEDIWFDTMDQHEAIAGAFPLELNRVNIYHAQTTSQMRVRVLIHLENQLKLNNFGVLRLALSHSKAQFSPQYKAVHRFGVDYPYAFLRKRFTPICPLCIDEAPYIRQQWQFISHQACEHHGCKLIHHCPECKSRLEYQSTEIISQCECGFELRNSPVEDAPEVEVLVAQWLSGNDSKPLGLLKGEMTLSERYGFLLWYVNRYGNIDDFSFESFIEYCGSWPTALWQDLDALKEKAELVRIKDWKKMFFNEAFGALLKDCRQLPSRQLSHNIVLTQVLAYFTKLIATVPSSAKGNVGDVLFSPLEASTLLSCTTDEVYRLYEFGEIKAAIRPRMHTKIASHESAFTLRSVIETKLTRMSSESDGLSVY…	9	9	9	9	9	9	9	10	12
88.5899	10N.286.45.B8 - 1.042.O.	1.042.O.	MG592425	MAISITGKLNKAANQFQAGESTGFGVRLGVRYYDRETQQNEYTNYEAVIFAKAPAQVQFYQQALVEDSVIELSGTTQKIKSFDGQNGQVLSIEIHDAKLGFVHTGNQPQQQQQAPQQQYQQPPQQQYNAPQQQGYQQPQQGYQNNPNNEPPF	10N.286.45.B8_contigs	MKTDIQLYPDESLESFLLRLSQEQGYERFSHFAEDIWFDTMDQHEAIAGAFPLELNRVNIYHAQTTSQMRVRVLIHLENQLKLNNFGVLRLALSHSKAQFSPQYKAVHRFGVDYPYAFLRKRFTPICPLCIDEAPYIRQQWQFISHQACEHHGCKLIHHCPECKSRLEYQSTEIISQCECGFELRNSPVEDAPEVEVLVAQWLSGNDSKPLGLLKGEMTLSERYGFLLWYVNRYGNIDDFSFESFIEYCGSWPTALWQDLDALKEKAELVRIKDWKKMFFNEAFGALLKDCRQLPSRQLSHNIVLTQVLAYFTKLIATVPSSAKGNVGDVLFSPLEASTLLSCTTDEVYRLYEFGEIKAAIRPRMHTKIASHESAFTLRSVIETKLTRMSSESDGLSVY…	9	9	9	9	9	9	9	11	13
88.5235	10N.286.55.C1 - 1.061.O.	1.061.O.	MG592439	MAISITGKLNKAANQFQAGESTGFGVRLGVRYYDRETQQNEYTNYEAVIFAKAPTQVQFYQQALVEGSVIELSGTTQKIKSFDGQNGQVLSIEIHDAKLGFVHTGNQPQQQQHAPQQQYQQPPQQQGYQQPQQGYQNNPNNEPPF	10N.286.55.C1_contigs	MKTDIQLYPDESLESFLLRLSQEQGYERFSHFAEDIWFDTMDQHEAIAGAFPLELNRVNIYHAQTTSQMRVRVLIHLENQLKLNNFGVLRLALSHSKAQFSPQYKAVHRFGVDYPYAFLRKRFTPICPLCIDEAPYIRQQWQFISHQACEHHGCKLIHHCPECKSRLEYQSTEIISQCECGFELRNSPVEDAPEVEVLVAQWLSGNDSKPLGLLKGEMTLSERYGFLLWYVNRYGNIDDFSFESFIEYCGSWPTALWQDLDALKEKAELVRIKDWKKMFFNEAFGALLKDCRQLPSRQLSHNIVLTQVLAYFTKLIATVPSSAKGNVGDVLFSPLEASTLLSCTTDEVYRLYEFGEIKAAIRPRMHTKIASHESAFTLRSVIETKLTRMSSESDGLSVY…	9	9	9	9	9	9	10	12	14
88.1451	10N.261.46.E8 - 1.217.O.	1.217.O.	MG592588	MTNQTQPQDGFRFNSQGHQVPVSQIKDVDLLRDDVVADIVKKAIATQETLALFKKEAMQNVADFVDLSSAEFDVKYGGTKGNVTLLSFDGKYKVQRSIGEHRVFDERIQAAKAIIDECINRWNENSSDEIKALVDLSFRVNKQGHIDVNQVLSLRQLNITDPDWLEAMDAIADSIKVIGKTPYLRIYERQGDGQYKQIALDIAKL	10N.261.46.E8_contigs	MSNLSIPTTPTGDYYQQRNDRQPSFNSDLFTQLLRSENLQQAWRQVKANKGAAGIDGMTIDAFPLWLQQGGWQQCKSQLEHGEYKPSAVRRVEIDKPDGGKRKLGIPTVIDRVIQQAIAQILTPLFDPFFSTNSFGFRPNRNAKQAVLKVRDTIKQKRTFAVDVDLSKFFDRVNHDLLMTQLKEKIQDKRLLALIGKYLRAGVMVNDQFEASSEGVPQGGPLSPLLSNIMLDSLDKELENRGHQFARYADDFIILVRSQRAGVRVLKSITHYLATTLKLVVNEQKSQVVKVAQSKFLGFTFSRGKIQWHAKTVRILKQKIRRLTNRNWGVSMSYQLFKLRQYLQGWINYFGIANAYQACVDLDQWIRRRVRMCYWRQWRKPRTKVQNLLKRGVWIQTAV…	10	10	10	10	10	10	11	13	15
87.5693	10N.261.48.B1 - 1.011.O.	1.011.O.	MG592396	MARYVKSKLTGVLYLITNYMEDDADDIIEYMHDQWGDHYELDPVPLPHEGGVKLYWCQVRQSLIHLKE	10N.261.48.B1_contigs	MNQKVHAPYHFVPLSKWVYMPEWAHLVSHDHPFEDGHSGVIEYTLRNNSPLCVGSDKDGNLVKFARNPAGIPVIPGSSLKGMLRNVLDIAGFGKFNQFDDFKLSYRDISSKSAYLDLIANNKPVPGWINYDEESEKWVFHKCSVAKIHHEEIKERLGIAVSNEDNAIKRYQKLPLSSSMRADISAPKGMKKNRWAENIGKGSTEGHLVFTNPRVLGQGDKRSYNFSYFFFNRQGIATTDNIQQQVHNLFENHRSISEKVNGQELDQVDYLQRNKHPEYGIPVFALMMRGEVQSFGFANMPRVSYKHSSLDLVDNLASEHSEDSYFSLSELLFGTLREGGYGLKSRVMFSDATLTSKETSIASQPVVLNSPKPSFLAAYIEQPMASDYASYGYQNEKEVA…	11	11	11	11	11	11	12	14	16
85.7827	10N.222.49.A5 - 1.034.O.	1.034.O.	MG592418	MGHKVAKCIFYDEASNIVFSAHGRPAKNMFIPVPQRGDWSDGMPKLYGAFSAGAIDRRREGITVHYRCAGFIKAASVPGLVSRVPWLKL	10N.222.49.A5_contigs	MTTYLVTRHPATVDWILQQGIQVDINLEHLACLDQIKAGDVVIGVLPITIVCQLNELGAEYIHFGLNVPREFRGKEISLEDLERFSPRLETFFVQRGS*	4	4	4	4	4	4	4	5	4
85.4979	10N.286.45.B8 - 2.275.O.	2.275.O.	MG592671	VVKFTTIVLYKSLRSGCGNPLIELKIKPILCDVKLKSH	10N.286.45.B8_contigs	MTKLSDLLTIEDEAVKQSALKKMFMPYTEDVCVDGCEKEALTILLNLSSSHQSDRCLDWLDVARAKRHLKAAENLDASLDEIKWFHTHNLKFPDCRVKDQRIVTQPLVTTEAFISSAVLEQRLGWAHNSAVYRHTLWLLNPFRWQSQSVSLLSLIQQETSVWLELLKGFGLGTKSLARLQNTMAEQLPENSFPDSVSTYSKQLRFPWGDDYVSVTPVVSHAIQSELEVRSRSQESKFSFVSSSLPNSASIGNLCGSLGGHMKVLNYPLDVKLAQGGTLTESRKKSGHYFDDYQVTNAKFCQVLNHLIGSEPSKTQKQRESARKVRSKILRKQIALWMLPLIELRDIVDADPNQQQLEGDDTLAQAFLALPESDLGSLANEFNRRLHLTFQNNRYAAKFA…	12	12	12	12	12	12	13	15	17
85.1203	10N.261.48.C6 - 1.034.O.	1.034.O.	MG592418	MGHKVAKCIFYDEASNIVFSAHGRPAKNMFIPVPQRGDWSDGMPKLYGAFSAGAIDRRREGITVHYRCAGFIKAASVPGLVSRVPWLKL	10N.261.48.C6_contigs	MNQKVHAPYHFVPLSKWVYMPEWAHLVSHDHPFEDGHSGVIEYTLRNNSPLCVGSDKDGNLVRFARNPAGIPVIPGSSLKGMLRNVLDIAGFGKFNQFDDFKLSYRDISSKSAYLDLIANNKPVPGWINYDEESEKWVFHKCSVAKIHHEEIKERLGIAVSNEDNAIKRYQKLPLSSSMRADISAPKGMKKNRWAESIGKGSTEGHLVFTNPRVLGKGDKRSYNFSYFFFNRQGIATTDNIQQQVHNLFENHRSISEKVNGQELDQVDYLQRNKHPEYGIPVFALMMRGEVQSFGFANMPRVSYKHSSLDLVDNLAKEHGEDSYFSLSELLFGTLREGGYGLKSRVMFSDATLTSKETSITSQPVVLNSPKPSFLAAYIEQPMASDYASYGYQNEKEVA…	4	4	4	4	4	4	4	5	4
85	10N.261.52.C9 - 1.011.O.	1.011.O.	MG592396	MARYVKSKLTGVLYLITNYMEDDADDIIEYMHDQWGDHYELDPVPLPHEGGVKLYWCQVRQSLIHLKE	10N.261.52.C9_contigs	MTKLSDLLTIEDEAVKQSALKKMFMPYTEDVCVDGCEKEALTILLNLSSSHQSDRCLDWLDVARAKRHLKAAENLDASLDEIKWFHTHNLKFPDCRVKDQRIVTQPLVTTEAFISSAVLEQRLGWAHNSAVYRHTLWLLNPFRWQSQSVSLLSLIQQETSVWLELLKGFGLGTKSLARLQNTMAEQLPENSFPDSVSTYSKQLRFPWGDDYVSVTPVVSHAIQSELEVRSRSQESKFSFVSSSLPNSASIGNLCGSLGGHMKVLNYPLDVKLAQGGTLTESRKKSGHYFDDYQVTNAKFCQVLNHLIGSEPSKTQKQRESARKVRSKILRKQIALWMLPLIELRDIVDADPNQQQLEGDDTLAQAFLALPESDLGSLANEFNRRLHLTFQNNRYAAKFA…	11	11	11	11	11	11	12	14	16
85	10N.286.45.C8 - 1.256.O.	1.256.O.	MG592622	VKPVTVLNSVAGYLFFFQKKKRKKKRKKKQHTKKKN	10N.286.45.C8_contigs	MLFIDSENFKMVHDTTAQSFTLECNCWPTGTLEHFIHSCWQLGMMRFHTFTNECGKELQDTYNLINYELGARVEYIDLALIDEDYRDKSQILDIIRSDEPTWVWFINCNALLNSSLAGWLRSMLTTYNVVHIRATFVLDNRDQFQRVFQSYTTPLYQSTMALRLIKGSL*	13	13	13	13	13	13	14	16	18
84.8172	10N.286.52.F6 - 1.265.O.	1.265.O.	MG592630	MIEFIKQHRAKCAKESKLLGFWWSSQNLDLMG	10N.286.52.F6_contigs	MDHSVHNKLVSFIWSIADDCLRDVYVRGKYRDVILPMVVLRRLDTLLEPSKEAVLEEVKFQKEEMNETELDDAPLCAASGYVFYNTSKWTLQTLFSTATNNQQILLANFEDYLNGFSDNVKEIVECFNLKAQIRHMAGKDVLLDVVEKFVSPYINLTPEVKEDPEGNKLPALTNLGMGYVFEELIRKFNEENNEEAGEHFTPREVIELMTHLVFDPIKDNLPLSITVYDPACGSGGMLTETQNFVEEKYPASNRDIYLYGKEINDETYAICKSDMMIKGNNPENIRVGSTLSTDEFSSERFDFMLSNPPYGKSWASEQKHIKEGKEVVDGRFKVKLKDYWGVEAEQDAIPRSSDGQLLFLMEMVTKMKSPQVSPLGARIASVHNGSSLFTGDAGSGESN…	14	14	14	14	14	14	15	17	19
84.5778	10N.286.46.A10 - 3.058.O.	3.058.O.	MG592672	MGITLRAFRVFDVFWCFHQPLVYKGYRGFDDVSCNVPKNMARVMQYKTRVSPDKPG	10N.286.46.A10_contigs	MSDVLNMVHETVNDLYESGAVDQATLNQVEKICLTVADDDGGDQESKESS*	15	15	15	15	15	15	16	18	20
84.303	10N.286.46.A11 - 1.048.O.	1.048.O.	MG592430	MFTLSVILVLGLSSICIAMVGNEANRNITDIVFMILFHLVGAAGFAALCVIQ	10N.286.46.A11_contigs	MSDVLNMVHETVNDLYESGAVDQATLNQVEKICLTVADDDGGDQESKESS*	44	44	16	16	16	16	17	19	21
83.9668	10N.286.54.E5 - 1.069.O.	1.069.O.	MG592446	MIISINNWSGGKVKIFNRTSGKVIRLEDGESETVETAAITSLIILRCILANSHLILFDIVNTD	10N.286.54.E5_contigs	MTCFETGWAALLDVSLWVSWANIVVCIVATAAAAFAYMQWVSSKEEARRATAYSAYSKFLELCQQSPDFAYADEQVIKVNQKDYIQYRWFVAQMLFAFEQILDVLPNDEEWKLTIRNQLKKHVWHLKGSSSVKRKEWSMPLQTLIEDLIK*	1	1	1	1	1	1	1	1	1
83.5697	10N.286.54.E5 - 1.107.B.	1.107.B.	MG592480	MFTLSVILVLGLSSICIAMVGNEANRNITDIVFMILFHLVGAAGFAALCVIQ	10N.286.54.E5_contigs	MTCFETGWAALLDVSLWVSWANIVVCIVATAAAAFAYMQWVSSKEEARRATAYSAYSKFLELCQQSPDFAYADEQVIKVNQKDYIQYRWFVAQMLFAFEQILDVLPNDEEWKLTIRNQLKKHVWHLKGSSSVKRKEWSMPLQTLIEDLIK*	44	44	16	16	16	16	17	19	21
83.2519	10N.286.49.C5 - 1.107.B.	1.107.B.	MG592480	MFTLSVILVLGLSSICIAMVGNEANRNITDIVFMILFHLVGAAGFAALCVIQ	10N.286.49.C5_contigs	MLFIDSENFKMVHDTTAQSFTLECNCWPTGTLEHFIHSCWQLGMMRFHTFTNECGKELQDTYNLINYELGARVEYIDLALIDEDYRDKSQILDIIRSDEPTWVWFINCNALLNSSLAGWLRSMLTTYNVVHIRATFVLDNRDQFQRVFQSYTTPLYQSTMALRLIKGSL*	44	44	16	16	16	16	17	19	21
82.8934	10N.261.46.A1 - 1.095.O.	1.095.O.	MG592469	MSITDFFKIAGISLLTTYAINQSPFKRYFS	10N.261.46.A1_contigs	MSDVLNMVHETVNDLYESGAVDQATLNQVEKICLTVADDDGGDQESKESS*	36	36	39	39	39	40	41	46	51
81.8615	10N.286.49.C5 - 1.141.A.	1.141.A.	MG592512	MGKKRNDLESIGAADCETDPFKYGRVPKPFLWGLYINEQYYEFEKTIDFVNFVRDEEWTIYAHNGGRFDWHFVLWECEIKPEIKIIAGRIAEFKIGKCTFRDSYNILPIPLAAYQKDEISYDLFEKEERYKPENWKAIRDYLKSDCVYLHELVTKFVTDYGFNITLASTALKVFNNMSGLKTPRTNINYFENLNRFYFGGRVQAFKTGTFEKEFYYVDINSAYPYAMKYPHAYGNKRSKSRHLPDERDPKIFVRLKCQSNGHFPIRTEKGALAFPDDKEIYEFHITGHEYYMAVDLGLLHSVEILEVLTFEDEICFGDYVDHFYVMKEEATLSGDTAKRLFAKLFMNSLYGKYATNPTKYKQYSVQNINTAEEFEYLNPDYECATEFGDNLLYERDLYD…	10N.286.49.C5_contigs	MLFIDSENFKMVHDTTAQSFTLECNCWPTGTLEHFIHSCWQLGMMRFHTFTNECGKELQDTYNLINYELGARVEYIDLALIDEDYRDKSQILDIIRSDEPTWVWFINCNALLNSSLAGWLRSMLTTYNVVHIRATFVLDNRDQFQRVFQSYTTPLYQSTMALRLIKGSL*	21	21	24	24	24	24	25	26	29
81.2696	10N.286.49.C5 - 1.095.O.	1.095.O.	MG592469	MSITDFFKIAGISLLTTYAINQSPFKRYFS	10N.286.49.C5_contigs	MLFIDSENFKMVHDTTAQSFTLECNCWPTGTLEHFIHSCWQLGMMRFHTFTNECGKELQDTYNLINYELGARVEYIDLALIDEDYRDKSQILDIIRSDEPTWVWFINCNALLNSSLAGWLRSMLTTYNVVHIRATFVLDNRDQFQRVFQSYTTPLYQSTMALRLIKGSL*	36	36	39	39	39	40	41	46	51
81.0067	10N.286.46.A10 - 1.095.O.	1.095.O.	MG592469	MGKKRNDLESIGAADCETDPFKYGRVPKPFLWGLYINEQYYEFEKTIDFVNFVRDEEWTIYAHNGGRFDWHFVLWECEIKPDIKIIAGRIAEFKIGKCTFRDSYNILPIPLAAYQKDEISYDLFEKEERYKPENWKAIRDYLKSDCVYLHELVTRFVTDYGFNITLASTALKVFNNMAGLKTPRTNINYFENLNRFYFGGRVQAFKTGVFEKDFYYVDINSAYPYAMKYPHAYGNKRAKSRHLPDERDPKIFVRLNCRSNGHFPIRTEKGALSFPDNGNVYEFHITGHEYYMAEDLELLHEVEILEVLTFEDEICFGDYVDHFYVMKEEATINKDTAKRLFAKLFMNSLYGKYATNPTKYKQYSVQNINTAEEFEYNNPDYECSTEFGDNLLYERDLYD…	10N.286.46.A10_contigs	MSDVLNMVHETVNDLYESGAVDQATLNQVEKICLTVADDDGGDQESKESS*	21	21	24	24	24	24	25	25	28
80.8368	10N.286.54.E5 - 1.095.O.	1.095.O.	MG592469	MGKKRNDLESIGAADCETDPFKYGRVPKPFLWGLYINEQYYEFEKTIDFVNFVRDEEWTIYAHNGGRFDWHFVLWECEIKPDIKIIAGRIAEFKIGKCTFRDSYNILPIPLAAYQKDEISYDLFEKEERYKPENWKAIRDYLKSDCVYLHELVTRFVTDYGFNITLASTALKVFNNMAGLKTPRTNINYFENLNRFYFGGRVQAFKTGVFEKDFYYVDINSAYPYAMKYPHAYGNKRAKSRHLPDERDPKIFVRLNCRSNGHFPIRTEKGALSFPDNGNVYEFHITGHEYYMAEDLELLHEVEILEVLTFEDEICFGDYVDHFYVMKEEATINKDTAKRLFAKLFMNSLYGKYATNPTKYKQYSVQNINTAEEFEYNNPDYECSTEFGDNLLYERDLYD…	10N.286.54.E5_contigs	MTCFETGWAALLDVSLWVSWANIVVCIVATAAAAFAYMQWVSSKEEARRATAYSAYSKFLELCQQSPDFAYADEQVIKVNQKDYIQYRWFVAQMLFAFEQILDVLPNDEEWKLTIRNQLKKHVWHLKGSSSVKRKEWSMPLQTLIEDLIK*	21	21	24	24	24	24	25	25	28
80.5382	10N.286.54.E5 - 1.141.A.	1.141.A.	MG592512	MGKKRNDLESIGAADCETDPFKYGRVPKPFLWGLYINEQYYEFEKTIDFVNFVRDEEWTIYAHNGGRFDWHFVLWECEIKPEIKIIAGRIAEFKIGKCTFRDSYNILPIPLAAYQKDEISYDLFEKEERYKPENWKAIRDYLKSDCVYLHELVTKFVTDYGFNITLASTALKVFNNMSGLKTPRTNINYFENLNRFYFGGRVQAFKTGTFEKEFYYVDINSAYPYAMKYPHAYGNKRSKSRHLPDERDPKIFVRLKCQSNGHFPIRTEKGALAFPDDKEIYEFHITGHEYYMAVDLGLLHSVEILEVLTFEDEICFGDYVDHFYVMKEEATLSGDTAKRLFAKLFMNSLYGKYATNPTKYKQYSVQNINTAEEFEYLNPDYECATEFGDNLLYERDLYD…	10N.286.54.E5_contigs	MTCFETGWAALLDVSLWVSWANIVVCIVATAAAAFAYMQWVSSKEEARRATAYSAYSKFLELCQQSPDFAYADEQVIKVNQKDYIQYRWFVAQMLFAFEQILDVLPNDEEWKLTIRNQLKKHVWHLKGSSSVKRKEWSMPLQTLIEDLIK*	21	21	24	24	24	24	25	26	29
80	10N.261.46.A1 - 1.141.A.	1.141.A.	MG592512	MGKKRNDLESIGAADCETDPFKYGRVPKPFLWGLYINEQYYEFEKTIDFVNFVRDEEWTIYAHNGGRFDWHFVLWECEIKPEIKIIAGRIAEFKIGKCTFRDSYNILPIPLAAYQKDEISYDLFEKEERYKPENWKAIRDYLKSDCVYLHELVTKFVTDYGFNITLASTALKVFNNMSGLKTPRTNINYFENLNRFYFGGRVQAFKTGTFEKEFYYVDINSAYPYAMKYPHAYGNKRSKSRHLPDERDPKIFVRLKCQSNGHFPIRTEKGALAFPDDKEIYEFHITGHEYYMAVDLGLLHSVEILEVLTFEDEICFGDYVDHFYVMKEEATLSGDTAKRLFAKLFMNSLYGKYATNPTKYKQYSVQNINTAEEFEYLNPDYECATEFGDNLLYERDLYD…	10N.261.46.A1_contigs	MSDVLNMVHETVNDLYESGAVDQATLNQVEKICLTVADDDGGDQESKESS*	21	21	24	24	24	24	25	26	29
80	10N.261.46.A1 - 1.069.O.	1.069.O.	MG592446	MPNVHPKKFNVIAGILAGALVGFGGGSVNLNYNASPNELQLLDCLTTIDNMIKSHDDNLGMVVQSLMESKIQS	10N.261.46.A1_contigs	MSDVLNMVHETVNDLYESGAVDQATLNQVEKICLTVADDDGGDQESKESS*	52	52	17	17	17	17	18	20	22
78.4752	10N.261.49.E11 - 1.217.O.	1.217.O.	MG592588	MTNQTQPQDGFRFNSQGHQVPVSQIKDVDLLRDDVVADIVKKAIATQETLALFKKEAMQNVADFVDLSSAEFDVKYGGTKGNVTLLSFDGKYKVQRSIGEHRVFDERIQAAKAIIDECINRWNENSSDEIKALVDLSFRVNKQGHIDVNQVLSLRQLNITDPDWLEAMDAIADSIKVIGKTPYLRIYERQGDGQYKQIALDIAKL	10N.261.49.E11_contigs	MHVQKRLKPVRGCWVLHEKFGRGLVRQVLDNIDGVTLKVGWQNREYGQTLVSASSVGSGFMVGMEVQHVPASKVESCLEEGIVLKIKEIAGFHQVLVNFSESSITRWLPFERLSWIKGVEHRFCTNDFGDLITPVRFKLKVLAHAIENWNENTGSLSRLDIDPLPHQVHLVHHILASGHLNWMIADDVGLGKTIETGMLLKALEQRGQAERVLLVTPAGLTSQWKEELHNKFGLSEFRIYGENFNIDEGREWGMYKHVIGSIDRFKEEHHLEKLLRAEPWDLVIFDEAHRLSRRQYGMKYDASNRFQLANFLRAKTKAMVLLSATPHQGKPDKFQSLLMLLNPDRKEEIETLALNPEILSEMIIRNNKSDVTDLEGNFIFKGKTTKAIRVTHDKALKDF…	10	10	10	10	10	10	11	13	15
76.2529	10N.286.49.C5 - 1.069.O.	1.069.O.	MG592446	MPNVHPKKFNVIAGILAGALVGFGGGSVNLNYNASPNELQLLDCLTTIDNMIKSHDDNLGMVVQSLMESKIQS	10N.286.49.C5_contigs	MLFIDSENFKMVHDTTAQSFTLECNCWPTGTLEHFIHSCWQLGMMRFHTFTNECGKELQDTYNLINYELGARVEYIDLALIDEDYRDKSQILDIIRSDEPTWVWFINCNALLNSSLAGWLRSMLTTYNVVHIRATFVLDNRDQFQRVFQSYTTPLYQSTMALRLIKGSL*	52	52	17	17	17	17	18	20	22
73.8896	10N.261.46.A1 - 1.011.O.	1.011.O.	MG592396	MARYVKSKLTGVLYLITNYMEDDADDIIEYMHDQWGDHYELDPVPLPHEGGVKLYWCQVRQSLIHLKE	10N.261.46.A1_contigs	MSDVLNMVHETVNDLYESGAVDQATLNQVEKICLTVADDDGGDQESKESS*	11	11	11	11	11	11	12	14	16
73.1413	10N.261.46.A1 - 1.044.O.	1.044.O.	MG592427	MTKQAKTFPTFKRIAAVSLPLLSLDYGKDGAAKSHFIKIEKAFVDHVSAKEDAKPDMMKSTVTELESGEQFDIYLHKGLAAKFEAGKAYEVVTRKVQGKRFPEHTIYEIEVA	10N.261.46.A1_contigs	MSDVLNMVHETVNDLYESGAVDQATLNQVEKICLTVADDDGGDQESKESS*	16	16	18	18	18	18	19	21	23
72.6235	10N.286.51.F12 - 1.190.O.	1.190.O.	MG592560	MQIRINPETDEQVKIKDSSAYTVEQLQEAFKASTYEALSKATGIAPATAFKCKKEKREIYHNPTTGKFFTVQINDIGQE	10N.286.51.F12_contigs	MSDVLNMVHETVNDLYESGAVDQATLNQVEKICLTVADDDGGDQESKESS*	17	17	19	19	19	19	20	22	24
72.2677	10N.286.49.C5 - 1.011.O.	1.011.O.	MG592396	MARYVKSKLTGVLYLITNYMEDDADDIIEYMHDQWGDHYELDPVPLPHEGGVKLYWCQVRQSLIHLKE	10N.286.49.C5_contigs	MLFIDSENFKMVHDTTAQSFTLECNCWPTGTLEHFIHSCWQLGMMRFHTFTNECGKELQDTYNLINYELGARVEYIDLALIDEDYRDKSQILDIIRSDEPTWVWFINCNALLNSSLAGWLRSMLTTYNVVHIRATFVLDNRDQFQRVFQSYTTPLYQSTMALRLIKGSL*	11	11	11	11	11	11	12	14	16
67.5578	10N.286.49.C5 - 1.044.O.	1.044.O.	MG592427	MTKQAKTFPTFKRIAAVSLPLLSLDYGKDGAAKSHFIKIEKAFVDHVSAKEDAKPDMMKSTVTELESGEQFDIYLHKGLAAKFEAGKAYEVVTRKVQGKRFPEHTIYEIEVA	10N.286.49.C5_contigs	MLFIDSENFKMVHDTTAQSFTLECNCWPTGTLEHFIHSCWQLGMMRFHTFTNECGKELQDTYNLINYELGARVEYIDLALIDEDYRDKSQILDIIRSDEPTWVWFINCNALLNSSLAGWLRSMLTTYNVVHIRATFVLDNRDQFQRVFQSYTTPLYQSTMALRLIKGSL*	16	16	18	18	18	18	19	21	23
66.419	10N.286.54.E5 - 1.057.O.	1.057.O.	MG592437	MTKQAKTFPTFKRIAAVSLPLLSLDYGKDGAAKSHFIKIEKAFVDHVSAKEDAKPDMMKSTVTELESGEQFDIYLHKGLAAKFEAGKAYEVVTRKVQGKRFPEHTIYEIEVA	10N.286.54.E5_contigs	MTCFETGWAALLDVSLWVSWANIVVCIVATAAAAFAYMQWVSSKEEARRATAYSAYSKFLELCQQSPDFAYADEQVIKVNQKDYIQYRWFVAQMLFAFEQILDVLPNDEEWKLTIRNQLKKHVWHLKGSSSVKRKEWSMPLQTLIEDLIK*	16	16	18	18	18	18	19	21	23
60	10N.286.54.E5 - 1.011.O.	1.011.O.	MG592396	MARYVKSKLTGVLYLITNYMEDDADDIIEYMHDQWGDHYELDPVPLPHEGGVKLYWCQVRQSLIHLKE	10N.286.54.E5_contigs	MTCFETGWAALLDVSLWVSWANIVVCIVATAAAAFAYMQWVSSKEEARRATAYSAYSKFLELCQQSPDFAYADEQVIKVNQKDYIQYRWFVAQMLFAFEQILDVLPNDEEWKLTIRNQLKKHVWHLKGSSSVKRKEWSMPLQTLIEDLIK*	11	11	11	11	11	11	12	14	16

## Sheet: vii_dGTPase
Supplementary Data 2 (vii): Putative anti-defense proteins predicted by the deep-learning model for dGTPase defense system
SCORE	Pair of bacterial and viral genomes	Virus ID	Virus accession	Anti-defense protein sequence, a.a.	Bacteria ID	Defense system protein sequence, a.a.	Anti-defense protein cluster number, 0 % identity	Anti-defense protein cluster number, 30 % identity	Anti-defense protein cluster number, 50 % identity	Anti-defense protein cluster number, 70 % identity	Anti-defense protein cluster number, 80 % identity	Anti-defense protein cluster number, 90 % identity	Anti-defense protein cluster number, 95 % identity	Anti-defense protein cluster number, 99 % identity	Anti-defense protein cluster number, 99,9 % identity
100	1C10 - 1.062.O.	1.062.O.	MG592440	VFGAAPAFHPPFLLVHTSPFLSNLNLINVMYIRKYA	1C10	MEVENLWQQRINEENKARLNDHRDPYQRDRARVLHSAAFRRLQAKTQVHGAGGNDFHRTRLTHSLEAAQIGSGILAQLQSKHPDLLSLLPTTSLIETLCLAHDIGHPPYGHGGEVALNYMMREHGGFEGNAQTFRIVSQLEPYTQHHGMNLCRRTLLGLLKYPSLLSKVERDSIPDGIDNPRQLKASRWTPAKGVFDIDNAYFEWVLQGLPSQDIEPFCSLKHHAGNRYTTKKTRFKSLDCSIMELADDIAYGVHDLEDAIVLGLISKQQWLESAASKLADCGHPWMEAEINRLSEQLFSGEHYLRKDAIGSIVNALLTSAEITEVTDSEFSHPLVRFNATLHPPMLDVLEVFKGFVSHYVIHATEVQLIEYKGQQIVIDLFEALSGDPERLLPEATKN…	27	27	30	30	30	31	32	36	40
70.9515	10N.261.54.A9 - 1.062.O.	1.062.O.	MG592440	VFGAAPAFHPPFLLVHTSPFLSNLNLINVMYIRKYA	10N.261.54.A9	MTSPLEPPFELEQEWQHRNDDEHKIRRDDHRSPYQRDRARVLHSAAFRRLQAKTQVHGTTVNDFHRTRLTHSLEAAQLGTGIVAQLKKKQPEFRDLLPSDALIDSLCLAHDIGHPPYGHGGEVALNYMMRDHGGFEGNAQTFRIVTQLEPYTEHHGMNLSRRTLLGLIKYPSLLSEVQAKLQSEPVKHQRQLRAKDWMPAKGIYDHDEELFNWVLEPLSSSDQQLLKQKRKTHTEPLEHNKTKYKSLDCSIMELADDIAYGVHDLEDAIVLGSVTKTQWVDSAYPQLKEMADPWICEHLDSITEMLFSGEQYRRKDAIGGIVNALLTSISIERVDASFENVLLAYNAVLEPSMDGTLDKLKHFVSEFVIQVPQVQVIEYKGQQIIMDMFEAFSADPERL…	27	27	30	30	30	31	32	36	40
68.026	10N.286.54.F12 - 1.080.O.	1.080.O.	MG592455	VAPFIRPLFLLVKSFFYHSYIPIVVKFKCLKCDVRAKR	10N.286.54.F12	MTSPIEPPFVLEQEWQDRNNDEHKIRRDDHRSPYQRDRARVLHSAAFRRLQAKTQVHGTTVNDFHRTRLTHSLEAAQLGTGIVAQLKKKQPEFRDLLPSDSLIDSLCLAHDIGHPPYGHGGEVALNYMMRDHGGFEGNAQTFRIVTQLEPYTEHHGMNLSRRTLLGLIKYPSLLSEVQAKLQSEPVKHQRQLRAKDWMPAKGIYDHDEELFNWVLEPLSNNDQQLLKQKRKSHTEPLEHNRTKYKSLDCSIMELADDIAYGVHDLEDAIVLGSVTKAQWVESAYPQLKEMADPWICEHLDSITEMLFSGEQYRRKDAIGGIVNALLTSISIKPVDTEFENVLLAYNAFLEPSMDATLDRLKRFVSEFVIQVPQVQVIEYKGQQIIMDMFEAFSADPERL…	25	25	28	28	28	29	30	34	38
62.0737	10N.261.46.A9 - 1.040.O.	1.040.O.	MG592424	VFGAAPAFHPPFLLVHTSPFLSNLNLINVMYIRKYA	10N.261.46.A9	MNSPLEPPFELEQEWQHRNDDEHKIRRDDHRSPYQRDRARVLHSAAFRRLQAKTQVHGTTVNDFHRTRLTHSLEAAQLGTGIVAQLKKKQPEFRDLLPSDSLIDSLCLAHDIGHPPYGHGGEVALNYMMRDHGGFEGNAQTFRIVTQLEPYTEHHGMNLSRRTLLGLIKYPSLLSEVQAKLQSEPVKHQRQLRAKDWMPAKGIYDHDEELFNWVLEPLSSSDQRLLKQKRKTHTEPLEHNKTKYKSLDCSIMELADDIAYGVHDLEDAIVLGSVTKSQWVESAYPQLKEMADPWVCEHLDSITEMLFSGEQYRRKDAIGGIVNALLTSISIERVDARFENVLLAYNAVLEPSMDATLDKLKHFVSEFVIQVPQVQVIEYKGQQIIMDMFEAFSADPERL…	27	27	30	30	30	31	32	36	40
60.7793	10N.286.46.B2 - 2.092.O.	2.092.O.	MG592663	VFGAAPAFHPPFLLVHTSPFLSNLNLINVMYIRKYA	10N.286.46.B2	MTSPLEPPFELEQEWQHRNDDEHKIRRDDHRSPYQRDRARVLHSAAFRRLQAKTQVHGTTVNDFHRTRLTHSLEAAQLGTGIVAQLKKKQPEFRDLLPSDSLIDSLCLAHDIGHPPYGHGGEVALNYMMRDHGGFEGNAQTFRIVTQLEPYTEHHGMNLSRRTLLGLIKYPSLLSEVQAKLQSEPVKHQRQLRAKDWMPAKGIYDHDEELFNWVLEPLSSSDQQLLKQKRKTHTEPLEHNKTKYKSLDCSIMELADDIAYGVHDLEDAIVLGSVTKAQWVDSAYPQLKEMADPWICEHLDSITEMLFSGEQYRRKDAIGGIVNALLTSISIEQVDANFENVLLAYNAVLEPSMDATLDKLKHFVSEFVIQVPQVQVIEYKGQQIIMDMFEAFSADPERL…	27	27	30	30	30	31	32	36	40
60.5803	10N.261.48.B3 - 2.092.O.	2.092.O.	MG592663	VFGAAPAFHPPFLLVHTSPFLSNLNLINVMYIRKYA	10N.261.48.B3	MNSPLEPPFELEQEWQHRNDDEHKIRRDDHRSPYQRDRARVLHSAAFRRLQAKTQVHGTAVNDFHRTRLTHSLEAAQLGTGIVAQLKKKQPEFRDLLPSDSLIDSLCLAHDIGHPPYGHGGEVALNYMMRDHGGFEGNAQTFRIVTQLEPYTEHHGMNLSRRTLLGLIKYPSLLSEVQAKLQSEPVKHQRQLRAKDWMPAKGIYDHDEELFNWVMEPLSSSDQQLLKQKRKTHTEPLEHNKTKYKSLDCSIMELADDIAYGVHDLEDAIVLGSVTKSQWVESAYPQLKEMADPWVCEHLDSITEMLFSGEQYRRKDAIGGIVNALLTSISIERVDASFENVLLAYNAVLEPSMDATLDKLKHFVSEFVIQVPQVQVIEYKGQQIIMDMFEAFSADPERL…	27	27	30	30	30	31	32	36	40
59.7128	10N.222.54.A2 - 1.011.O.	1.011.O.	MG592396	VFGAAPAFHPPFLLVHTSPFLSNLNLINVMYIRKYA	10N.222.54.A2	MTSLLEPPFELEQEWQHRNDDEHKIRRDDHRSPYQRDRARVLHSAAFRRLQAKTQVHGTTVNDFHRTRLTHSLEAAQLGTGIVAQLKKKQPEFRVLLPSDSLIDSLCLAHDIGHPPYGHGGEVALNYMMRDHGGFEGNAQTFRIVTQLEPYTEHHGMNLSRRTLLGLIKYPSLLSEVQAKTQSQPVKHQRQLRARDWMPAKGIYDHDEELFNWVLEPLSSNDRQLIKQKRKSHTEPLEHNKTKYKSLDCSIMELADDIAYGVHDLEDAIVLGSVTKAQWVDSAYPQLREMADPWICKHLDSITEMLFSGEQYRRKDAIGGIVNALLTSISIKRVDESFENVLLAYNAVLEPSMDGTLDKLKHFVSEFVIQVPQVQVIEYKGQQIIMDMFEAFSADPERL…	27	27	30	30	30	31	32	36	40
55.5458	10N.286.49.A2 - 1.040.O.	1.040.O.	MG592424	VFGAAPAFHPPFLLVHTSPFLSNLNLINVMYIRKYA	10N.286.49.A2	MTSPIEPPFVLEQEWQDRNNDEHKIRRDDHRSPYQRDRARVLHSAAFRRLQAKTQVHGTTVNDFHRTRLTHSLEAAQLGTGIVAQLKKKQPEFRDLLPSDSLIDSLCLAHDIGHPPYGHGGEVALNYMMRDHGGFEGNAQTFRIVTQLEPYTEHHGMNLSRRTLLGLIKYPSLLSEVQAKLQSEPVKHQRQLRAKDWMPAKGIYDHDEELFNWVLEPLSNNDQQLLKQKRKSHTEPLEHNKTKYKSLDCSIMELADDIAYGVHDLEDAIVLGSVTKAQWVESAYPQLKEMADPWICEHLDSITEMLFSGEQYRRKDAIGGIVNALLTSISIKPVDTKFENVLLAYNAFLEPSMDATLDRLKRFVSEFVIQVPQVQVIEYKGQQIIMDMFEAFSADPERL…	27	27	30	30	30	31	32	36	40
54.51	10N.286.45.A1 - 1.034.O.	1.034.O.	MG592418	MSKHRGKAKRRATWVQTKRSPKNKHRWETEVNRARRKLAYAEYHKMKNRRGRNYV	10N.286.45.A1	MDITPWHERRLIEDKHRRNDHRSPYQRDRARILHSAAFRRLQAKTQVLGVGLNDFYRTRLTHSLEVSQIGTGIRAQLKQKHPQQDALLDSMSLIESLCLAHDIGHPPFGHGGEVALNYMMRDHGGFEGNGQTFRILTRIEPYTEYYGMNLCRRTLLGVLKYPAPYSLLQRKLPHKEVCHFRQLKPSQWPPVKGLFDDDQEILDWVLAPLSEADKTLFLSHQLVEGSVHRRTQYKSFDCSIMELADDIAYAVHDLEDAIVMGIVTREQWTKDVENKLKQSQDCWIKNEFTTIGERLFSSKHHLRKDAIGTLVNGFVTAISITENIKFSEPLLRYNAALESDFNEALEILKQFVYQYVIRKPEIQMLEYKGQQIVMELFEAFISDPERLLPTNTQERWKEA…	41	41	44	44	44	45	46	51	56
52.8855	10N.261.52.F1 - 1.125.O.	1.125.O.	MG592500	VFGAAPAFHPPFLLVHTSPFLSNLNLINVMYIRKYA	10N.261.52.F1	MTSPIEPPFVLEQEWQDRNNDEHKIRRDDHRSPYQRDRARVLHSAAFRRLQAKTQVHGTTVNDFHRTRLTHSLEAAQLGTGIVAQLKKKQPEFRDLLPSDSLIDSLCLAHDIGHPPYGHGGEVALNYMMRDHGGFEGNAQTFRIVTQLEPYTEHHGMNLSRRTLLGLIKYPSLLSEVQAKFQSEPVKHQRQLRAKDWMPAKGIYDHDEELFNWVLEPLSNNDQQRLKQKRKSHTEPLEHNKTKYKSLDCSIMELADDIAYGVHDLEDAIVLGSVTKAQWVESAYPQLKEMADPWICEHLDSITEMLFSGEQYRRKDAIGGIVNALLTSISIKPVDTEFENVLLAYNAFLEPSMDATLDRLKRFVSEFVIQVPQVQVIEYKGQQIIMDMFEAFSADPERL…	27	27	30	30	30	31	32	36	40
51.6554	10N.286.54.B3 - 1.040.O.	1.040.O.	MG592424	VFGAAPAFHPPFLLVHTSPFLSNLNLINVMYIRKYA	10N.286.54.B3	MTSPIEPPFVLEQEWQDRNNDEHKIRRDDHRSPYQRDRARVLHSAAFRRLQAKTQVHGTTVNDFHRTRLTHSLEAAQLGTGIVAQLKKKQPEFRDLLPSDSLIDSLCLAHDIGHPPYGHGGEVALNYMMRDHGGFEGNAQTFRIVTQLEPYTEHHGMNLSRRTLLGLIKYPSLLSEVQAKLQSEPVKHQRQLRAKDWMPAKGIYDHDEELFNWVLEPLSNNDQQLLKQKRKSHTEPLEHNRTKYKSLDCSIMELADDIAYGVHDLEDAIVLGSVTKAQWVESAYPQLKEMADPWICEHLDSITEMLFSGEQYRRKDAIGGIVNALLTSISIKPVDTEFENVLLAYNAFLEPSMDATLDRLKRFVSEFVIQVPQVQVIEYKGQQIIMDMFEAFSADPERL…	27	27	30	30	30	31	32	36	40
50.2629	10N.286.49.F5 - 1.069.O.	1.069.O.	MG592446	VFGAAPAFHPPFLLVHTSPFLSNLNLINVMYIRKYA	10N.286.49.F5	MTSPLEPPFELEQEWQHRNDDEHKIRRDDHRSPYQRDRARVLHSAAFRRLQAKTQVHGTTVNDFHRTRLTHSLEAAQLGTGIVAQLKKKQPEFRDLLPSDSLIDSLCLAHDIGHPPYGHGGEVALNYMMRDHGGFEGNAQTFRIVTQLEPYTEHHGMNLSRRTLLGLIKYPSLLSEVQAKLQSEPVKHQRQLRAKDWMPAKGIYDHDEELFNWVLEPLSSSDQQLLKQKRKTHTEPLEHNKTKYKSLDCSIMELADDIAYGVHDLEDAIVLGSVTKAQWVDSAYPQLKEMADPWICEHLDSITEMLFSGEQYRRKDAIGGIVNALLTSISIERVDASFENVLLAYNAVLEPSMDATLDKLKHFVSEFVIQVPQVQVIEYKGQQIIMDMFEAFSADPERL…	27	27	30	30	30	31	32	36	40

## Sheet: viii_DND
Supplementary Data 2 (vii): Putative anti-defense proteins predicted by the deep-learning model for DND defense system
SCORE	Pair of bacterial and viral genomes	Virus ID	Virus accession	Anti-defense protein sequence, a.a.	Bacteria ID	Defense system protein sequence, a.a.	Anti-defense protein cluster number, 0 % identity	Anti-defense protein cluster number, 30 % identity	Anti-defense protein cluster number, 50 % identity	Anti-defense protein cluster number, 70 % identity	Anti-defense protein cluster number, 80 % identity	Anti-defense protein cluster number, 90 % identity	Anti-defense protein cluster number, 95 % identity	Anti-defense protein cluster number, 99 % identity	Anti-defense protein cluster number, 99,9 % identity
100	5F23 - 1.215.A.	1.215.A.	MG592585	MILASVAELRTRLNVSDKPVYNRVLTDILTNVTLGIETHLDTKFTRKEHKDVFFAGSNNYLVTGAPGRVVNGSPGVLYLLLSGLNVSNLTLSIGTTFSGSGSATNDYKLEERGIASLFNGWMPDDYITAVYQGGYETIDEETIPVYQGVPTLIKQAALMFAEHVYMLKYGDSQLDGSLPAGEDYTDPPNAVIQILYQYNRTAPHALRSLV	5F23	MIHDLQLTEDLAEEYQEFINTEDFANHKLSHYVADVQRVYCADNRPWVIGYSGGKDSSAIMSLVYLALLGLKEEDRTKQVFVVTSDTLVETPVVVNHINDSLAAIQTGAKRDGLPITCHKVVPEDDQTFWSSLLGKGYPAPTRSFRWCTERMKINPVSDFIKSKVSQFDEVIVVLGSRSQESASRAQVIAKHKIDGSRLARHTTLANAFIFTPIDTWGVDDVWKILRLCHLVTKETPYGTKNIWSNDYDLEWENPWGGKNLTLWNLYKDSSGQGECPMVIDETTPSCGNSRFGCWTCTVVTRDRAMESLIQNGEEWMAPLLEFRNKLAMTTDPANKEEYRNHKRRTGKVSYQYAKEGEDIASERKHIPGPYWLKYRRQWLRELLELDKKFKAEGREIEL…	30	30	33	33	33	34	35	39	43
76.9405	10N.261.54.C7 - 2.117.O.	2.117.O.	MG592667	LKLIAFFSPIDLINPANRPIIKGWKGMVLFI	10N.261.54.C7	MLPNRMNLTRSTEEQLKKLKGYTGITPNVSARIAFFRSIESDFRYQGQEAKLDGSLVLDKYTWLGETGDVTELMLKMYYPELDSKQYQQAWAAHVEDGIASIRNHKSLTHLSTNI*	34	34	37	37	37	38	39	43	47
75.0175	10N.222.51.C2 - 2.117.O.	2.117.O.	MG592667	LKLIAFFSPIDLINPANRPIIKGWKGMVLFI	10N.222.51.C2	MLPNRMNLTRSTEEQLKKLKGYTGVTPNVSARIAFFRSIESDFRYQGQEAKLDGPLVLDKYTWLGETGEVTELMLKMYYPELDTKEYQQAWAAHVEDGIASVRNHKLISALATKIA*	34	34	37	37	37	38	39	43	47
69.0479	5F97 - 1.215.A.	1.215.A.	MG592585	MILASVAELRTRLNVSDKPVYNRVLTDILTNVTLGIETHLDTKFTRKEHKDVFFAGSNNYLVTGAPGRVVNGSPGVLYLLLSGLNVSNLTLSIGTTFSGSGSATNDYKLEERGIASLFNGWMPDDYITAVYQGGYETIDEETIPVYQGVPTLIKQAALMFAEHVYMLKYGDSQLDGSLPAGEDYTDPPNAVIQILYQYNRTAPHALRSLV	5F97	MIHDLQLTEDLAEEYQEFINTEDFANHKLSHYVADVQRVYCADNRPWVIGYSGGKDSSAIMSLVYLALLGLKEEDRTKQVFVVTSDTLVETPVVVNHINDSLTAIQTGAKRDGLPITCHKVVPEDDQTFWSSLLGKGYPAPTRSFRWCTERMKINPVSDFIKSKVSQFDEVIVVLGSRSQESASRAQVIAKHKIDGSRLARHTTLANAFIFTPIDTWGVDDVWKILRLCHLVTKETPYGTKNIWSNDYDLEWENPWGGKNLTLWNLYKDSSGQGECPMVIDETTPSCGNSRFGCWTCTVVTRDRAMESLIQNGEEWMAPLLEFRNKLAMTTDPANKEEYRNHKRRTGKVSYQYAKEGEDIASERKHVPGPYWLKYRRQWLRELLELDKKFKAEGREIEL…	30	30	33	33	33	34	35	39	43
65.1066	10N.222.49.A8 - 2.117.O.	2.117.O.	MG592667	LKLIAFFSPIDLINPANRPIIKGWKGMVLFI	10N.222.49.A8	MIDLRTALSVMSKSSPYAVSTERDATISTDLDAVKKYLYVQTDIEADFVKQLKGLSSTDKKIIFLCGSSGDGKSEILTKYKKEYQNRADFHLDATHSFRPSDSAIETLDELFTEFNTTPKPLVVGINTGMLGNYAEEGAVTEVTSSIKAFLEKQPTSENHIFLDFEDYPKFTLEIDGHTSKFAKELLQKITEKNENLIRQYFDVEMQKQSSDKKLCANYQLLGRKEVQDVIVDLLFKARLMKDQFLTARALLDFIFHLLAGPGYLFDNLFKKGENELTNIISDFDPSIQRTQKIDKFILSHSLQLPDVNFDDYKTALTAFGIRRGLNAESYLRLFYILRKSDYGNEYHKQFSNDFDEHLIDNYSEVWQLHTAFDSSPEQKEKLRHFYRQTAITAIHKYN…	34	34	37	37	37	38	39	43	47
59.7741	10N.286.55.B3 - 1.056.O.	1.056.O.	MG592436	VEVFLYLVHVHQLTYCLLMIYINCFQMYLYFLRRRGAIILS	10N.286.55.B3	MIHELKLAEDLAEEYQEFINAEEFANNKLSYYVADVQRVYCADNRPWVIGYSGGKDSSAIMSLIYMALLGLEKEQRHKPVFVVSSDTLVETPVVVNHIKDSLAAIQKGAKRDDLPISCHKVVPESDQTFWSSLLGKGYPAPTRSFRWCTERMKIDPVSDFIKSKVSQFDEVIVVLGSRSQESASRAQVIAKHKIDGSRLARHTTLANAFIYTPIDTWAVDDVWKILRLCHLETKETPLGTRNIWKDDYDLEWENPWGGKNLVLWNLYKDSSGQGECPMVIDETTPSCGNSRFGCWTCTVVTKDRAMESLIQNGEEWMAPLLEFRNKLAMTTDPANKAEFRNHKRRTGRVSYQYAKEGEDIASERKHVPGPYWLKYRRQWLRELLELDNKFKAEGREIEL…	26	26	29	29	29	30	31	35	39
59.4273	10N.261.54.B2 - 2.117.O.	2.117.O.	MG592667	LKLIAFFSPIDLINPANRPIIKGWKGMVLFI	10N.261.54.B2	MLPNRMNLARTTEEQLKKLKGYTGVTPNVSARIAFFRSIESDFRYQGREAKLDGSLVLDKYTWLGETGRVTELLLKMYYPELDTKECQQAWAAHVEDGIASIRNHRTLVNLSSSL*	34	34	37	37	37	38	39	43	47
58.2031	10N.222.49.A1 - 1.171.O.	1.171.O.	MG592538	MLHETLKHVAPLCDALEKNLEDFDGDASLLAHQSAELIVWTQTLQSLFDLEPSNPHKALTALDESIASLQAVRKHVFAAAEQRVLAGESVDGFTVSQGKATRSIPDYNAAVALLESAAGIPNSWLFENKPLGLPAIEKLLVAQKIKPDAREALLSQFVVVKEGKSKVVKV	10N.222.49.A1	MLPNRMNLTRSTEEQLKKLKGYTGITPNVSARIAFFRSIESNFRYQGQEAKLDGSLVLDKYTWLGETSEVTELMLKMYYPELDTKEYQQAWAAHVEDGIASIRNHRNLVAITNSI*	31	31	34	34	34	35	36	40	44
58.0642	10N.261.46.A5 - 1.215.A.	1.215.A.	MG592585	MILASVAELRTRLNVSDKPVYNRVLTDILTNVTLGIETHLDTKFTRKEHKDVFFAGSNNYLVTGAPGRVVNGSPGVLYLLLSGLNVSNLTLSIGTTFSGSGSATNDYKLEERGIASLFNGWMPDDYITAVYQGGYETIDEETIPVYQGVPTLIKQAALMFAEHVYMLKYGDSQLDGSLPAGEDYTDPPNAVIQILYQYNRTAPHALRSLV	10N.261.46.A5	MIHELKLAEDLAEEYQEFINAEEFANNKLSYYVADVQRVYCADNRPWVIGYSGGKDSSAIMSLIYMALLGLEKEQRHKPVFVVSSDTLVETPVVVNHIKDSLAAIQKGAKRDDLPISCHKVVPESDQTFWSSLLGKGYPAPTRSFRWCTERMKIDPVSDFIKSKVSQFDEVIVVLGSRSQESASRAQVIAKHKIDGSRLARHTTLANAFIYTPIDTWAVDDVWKILRLCHLETKETPLGTRNIWKDDYDLEWENPWGGKNLVLWNLYKDSSGQGECPMVIDETTPSCGNSRFGCWTCTVVTKDRAMESLIQNGEEWMAPLLEFRNKLAMTTDPANKAEFRNHKRRTGRVSYQYAKEGEDIASERKHVPGPYWLKYRRQWLRELLELDKKYKAEGREIEL…	30	30	33	33	33	34	35	39	43
57.2893	10N.222.51.B2 - 1.215.A.	1.215.A.	MG592585	MILASVAELRTRLNVSDKPVYNRVLTDILTNVTLGIETHLDTKFTRKEHKDVFFAGSNNYLVTGAPGRVVNGSPGVLYLLLSGLNVSNLTLSIGTTFSGSGSATNDYKLEERGIASLFNGWMPDDYITAVYQGGYETIDEETIPVYQGVPTLIKQAALMFAEHVYMLKYGDSQLDGSLPAGEDYTDPPNAVIQILYQYNRTAPHALRSLV	10N.222.51.B2	MSKSSPYAVSTERDATISTDLDAVKKYLYVQTDIEADFVKQLKGLSSTDKKIIFLCGSSGDGKSEILTKYKKEYQNRADFHLDATHSFRPSDSAIETLNELFTEFNATPKPLVVGINTGMLGNYAEEGTVTEVTSSIKAFLEKQPTSENHIFLDFEDYPKFTLEIDGHTSKFAKELLQKITEKDENLIRQYFDVEMHKQSPDKKLCANYQLLGREEVQDVIVDLLFKARLMKDQFLTARALLDFIFHLLAGPGYLFDNLFKKGENELTNIISDFDPSIQRTQKIDKFILSHSLQLPDVNFDDYKTALTAFGIRRGLNAESYLRLFYILRKSDYGNEYHKQFSNDFDEHLIDNYSEVWQLHTAFDSSPEQKEKLRYFYRQTAITAIHKYNNRNAPKLAKG…	30	30	33	33	33	34	35	39	43
56.0488	10N.286.49.A10 - 1.068.O.	1.068.O.	MG592445	LLCVLPCGSPVQRRLCLTAWIITLCIVVSTWIRNRYTLIN	10N.286.49.A10	MIHELKLAEDLAEEYQEFINAEEFANNKLSYYVADVQRVYCADNRPWVIGYSGGKDSSAIMSLIYMALLGLEKEQRHKPVFVVSSDTLVETPVVVNHIKDSLAAIQKGAKRDDLPISCHKVVPESDQTFWSSLLGKGYPAPTRSFRWCTERMKIDPVSDFIKSKVSQFDEVIVVLGSRSQESASRAQVIAKHKIDGSRLARHTTLANAFIYTPIDTWAVDDVWKILRLCHLETKETPLGIRNIWKDDYDLEWENPWGGKNLVLWNLYKDSSGQGECPMVIDETTPSCGNSRFGCWTCTVVTKDRAMESLIQNGEEWMSPLLEFRNKLAATNVPKDKDEYRNFKRRTGRVHDHTKKLPWDIKTPEAAITYIKTEKRDELYDTQEFRIINDNNIEILDGKT…	38	38	41	41	41	42	43	48	53
53.1643	10N.222.46.E9 - 1.040.O.	1.040.O.	MG592424	VFGAAPAFHPPFLLVHTSPFLSNLNLINVMYIRKYA	10N.222.46.E9	MLPNRMNLTRSTEEQLKKLKGYTGVTPNVSARIAFFRSIESDFRYQGQEAKLDGPLVLDKYTWLGETGEVTELMLKMYYPELDTKEYQQAWAAHVEDGIASVRNHKLISALATKIA*	27	27	30	30	30	31	32	36	40
52.6208	10N.261.51.C6 - 1.056.O.	1.056.O.	MG592436	VEVFLYLVHVHQLTYCLLMIYINCFQMYLYFLRRRGAIILS	10N.261.51.C6	MSKSSPYAVSTERDATISTDLDAVKKYLYVQTDIEADFVKQLKGLSSTDKKIIFLCGSSGDGKSEILTKYKKEYQNRADFHLDATHSFRPSDSAIETLDELFTEFNTTPKPLVVGINTGMLGNYAEEGAVTEVTSSIKAFLEKQPTSENHIFLDFEDYPKFTLEIDGHTSKFAKELLQKITEKDENLIRQYFDVEMHKQSPDKKLCANYQLLGREEVQDVIVDLLFKARLMKDQFLTARALLDFIFHLLAGPGYLFDNLFKKGENELTNIISDFDPSIQRTQKIDKFILSHSLQLPDVNFDDYKTALTAFGIRRGLNAESYLRLFYILRKSDYGNEYHKQFSNDFDEHLIDNYSEVWQLHTAFDSSPEQKEKLRHFYRQTAITAIHKYNNRNAPKLAKG…	26	26	29	29	29	30	31	35	39

## Sheet: ix_DRT
Supplementary Data 2 (ix): Putative anti-defense proteins predicted by the deep-learning model for DRT defense system
SCORE	Pair of bacterial and viral genomes	Virus ID	Virus accession	Anti-defense protein sequence, a.a.	Bacteria ID	Defense system protein sequence, a.a.	Anti-defense protein cluster number, 0 % identity	Anti-defense protein cluster number, 30 % identity	Anti-defense protein cluster number, 50 % identity	Anti-defense protein cluster number, 70 % identity	Anti-defense protein cluster number, 80 % identity	Anti-defense protein cluster number, 90 % identity	Anti-defense protein cluster number, 95 % identity	Anti-defense protein cluster number, 99 % identity	Anti-defense protein cluster number, 99,9 % identity
100	10N.286.49.E1 - 1.068.O.	1.068.O.	MG592445	LLCVLPCGSPVQRRLCLTAWIITLCIVVSTWIRNRYTLIN	10N.286.49.E1	LRNKAYRSRSYLHFDLPVSFNKAKNLVTNPILVSKHAFFPLINYAVESKKISKNKDTRKIDVAVKERPIAYSSHVDSHIYAFYANVLSKKYEAKLKSAGLTESILAFRGLGKSNIDFSFEAFEQIKIMGECSAVALDFSKFFDTLDHDLLKQSWASLLGEKKLPSDHFNVFKSITKFSKVNKVELYKEFGISPNNPKNGRNRVCTAQEFRNVVRKKKLIKTNPDPFGIPQGSPISALLSNIYMLEFDAEMKRYMDIHGGKYYRYCDDMLFIVPAPLRDKVAGYAQEQVKQLKVSINPKKTELRTFSSQGGILVADQMLQYLGFMFDGENVYIRSSSLARYSEKMKRGIRLAKKTMDKYNAVRAAKGLPEKGLYKRKLYSRYTHLGGRNFVTYGLRAAST…	38	38	41	41	41	42	43	48	53
99.1894	10N.261.55.E8 - 3.058.O.	3.058.O.	MG592672	MGITLRAFRVFDVFWCFHQPLVYKGYRGFDDVSCNVPKNMARVMQYKTRVSPDKPG	10N.261.55.E8	MIDSQYVKDALLRFNYLPLQKDKNEELPELFSSELFSSSICDELAAIDLRKGGYDHFNYFATRFNNVHRQLSVPHPLAYAHLVSHISDNWSRFSHIEDNENSVIRPFKHKDGRIIIMTYERAKEKTKRYQDGVRGNKFIVHSDISNFYPSLYTHSIPWALLGIDEAKQNTNSGPENKLDTLQRMTKRNETMGVAIGPGTSNIVSELILFEVDKTLTEEGFEFYRFIDDYTAFCSTYEQSEKFIRLLSEQLSKFGLLLNIKKTEIKKLPQASAADWVSDLGSRFSQRIKVSEHYCTRMLDYAVDLQGKNSGGSILKYTIKSLIKKANPTGKKALLEYTANLSMHYPVLLPLLMQLLPVVSCKKGDKYYQSLLSTLKECTINKNSDGIVWCLYYIKKYYNG…	15	15	15	15	15	15	16	18	20
96.6222	10N.222.51.F6 - 1.267.O.	1.267.O.	MG592632	MAIVWLKLGCRCWCFYVGKRTPPPRSTRGVLMATGSY	10N.222.51.F6	MSLEKHLASVIKEEAEKLIQRYHEYHNRLHLEHVRNQKRLGISAPPKIVHQPNYWSIDKKFNPFYVRKKHKSIAKSIAKKIEERTYTPNPAYIKIVPKADGGERNVSIFQIPDAAVSKLFFNRLLAKNKHRFSSFSYAYRNDRNVHFAIQDISVNLRRNERTFLAEFDFSDYFGSISHDYLVKQFDQNGFFISPEERYIIKAFLKDRSVGIPQGTSISLFLANLTCWNFDSDLENEGVKFSRYADDTIVWTQDYSKICNAFGLINRFSKDAGVKINAAKSEGISLLTKEDFPSEISAKNSLDFLGYTLSVDNVSIKDKSLLKIKKQISYILYRNLIQPLKQASLAGQEIPANNRDKNFLSAMMQIRRYMYGGLSKKQIKDYLSGRTKRIYFKGVMSFYP…	32	32	35	35	35	36	37	41	45
94.7425	10N.222.55.B11 - 1.066.O.	1.066.O.	MG592443	MTKFLSHLMLATYQSNTHKFMSDGEMGKIYEVTHAHVSYSRKRLIKEGHSFAFNTSVTKSNMPVQTYKYVGQTNLGLVCVDEKKDAMDGDTLLRLRYRMQSPSVPARQFPVEPGHVSLLGISSLV	10N.222.55.B11	MTCFETGWAALLDVSLWVSWANIVVCIVATAAAAFAYMQWVSSKEEARRATAYSAYSKFLELCQQSPDFAYADEQVIKVNQKDYIQYRWFVAQMLFAFEQILDVLPNDEEWKLTIRNQLKKHVWHLKGSSSVKRKEWSMPLQTLIEDLIK*	42	42	45	45	45	46	47	52	50
92.1604	072435 - 2.117.O.	2.117.O.	MG592667	LKLIAFFSPIDLINPANRPIIKGWKGMVLFI	72435	MSSNKPLWYRSRGYLHFDLPVSINKAKNLVTNPDLVSKHAFFPLISYTVESKKISKNKDTRKIDVAVKERPIAYSSHMDSHIYAFYANLLSKKYEAKLKSAGLTESILAFRGLGKSNIDFAFEAFEQIKTMGECSAVALDFSKFFDTLDHDLLKQSWANLLGEKKLPSDHFNVFKSITKFSQVNKVELYKEFSISPNNPKNGRNRVCTAQEFRDVVRNKKLIKTNKGSFGIPQGSPISALLSNIYMFEFDAEMKRYMDIHGGKYYRYCDDMLFIVPAPLRDKVAGYAQEQVKNLKVSINPKKTELRTFSSQGGILVADQMLQYLGFMFDGENVYIRSSSLARYSEKMKRGIRLAKKTMDKYNAVRVAKGLPEKSLYKRKLYSRYTHLGGRNFVTYGLRA…	34	34	37	37	37	38	39	43	47
91.6574	10N.261.51.C9 - 3.058.O.	3.058.O.	MG592672	MGITLRAFRVFDVFWCFHQPLVYKGYRGFDDVSCNVPKNMARVMQYKTRVSPDKPG	10N.261.51.C9	MNDKEVTCFYTGWSALLDVELWVKWMGIFASIGTVVIAGFALYVAHKQLNLGWKQLKSNRQEAKSATAHDLYHQYLILCIEKPEFSYGMAKPAERTMEYGKYCWFASSMLFTFEQILETMPDDEKWQATIKSQLLIHKEWLSISSTVREKQWDDSLQRLIEATIAGH*	15	15	15	15	15	15	16	18	20
86.4309	10N.261.48.B3 - 1.196.O.	1.196.O.	MG592565	MAIVWLKLGCRCWCFYVGKRTPPPRSTRGVLMATGSY	10N.261.48.B3	LRNKAYRSRSYLHFDLPVSFNKAKNLVTNPILVSKHAFFPLINYAVESKKISKNKDTRKIDVAVKERPIAYSSHVDSHIYAFYANVLSKKYEAKLKSAGLTESILAFRGLGKSNIDFSFEAFEQIKIMGECSAVALDFSKFFDTLDHDLLKQSWASLLGEKKLPSDHFNVFKSITKFSKVNKVELYKEFGISPNNPKNGRNRVCTAQEFRNVVRKKKLIKTNPDPFGIPQGSPISALLSNIYMLEFDAEMKRYMDIHGGKYYRYCDDMLFIVPAPLRDKVAGYAQEQVKQLKVSINPKKTELRTFSSQGGILVADQMLQYLGFMFDGENVYIRSSSLARYSEKMKRGIRLAKKTMDKYNAVRAAKGLPEKGLYKRKLYSRYTHLGGRNFVTYGLRAAST…	32	32	35	35	35	36	37	41	45
85.6871	10N.261.45.F4 - 1.066.O.	1.066.O.	MG592443	MTKFLSHLMLATYQSNTHKFMSDGEMGKIYEVTHAHVSYSRKRLIKEGHSFAFNTSVTKSNMPVQTYKYVGQTNLGLVCVDEKKDAMDGDTLLRLRYRMQSPSVPARQFPVEPGHVSLLGISSLV	10N.261.45.F4	MCLDFGAAQFLSFEFWDARADIFVMIIAFFALVFAIIQILSSRNEARRATAYASYQSYLNLCFEHPELARGTKMNITSDPATYSKYRWFIAQMLFCFEQVLDAEPNSDTWNEAIKSQLKRHVWHLEVSKSVARKEWSSRLRKHLPEPREQTTAELISG*	42	42	45	45	45	46	47	52	50
82.5533	10N.286.54.F12 - 1.068.O.	1.068.O.	MG592445	LLCVLPCGSPVQRRLCLTAWIITLCIVVSTWIRNRYTLIN	10N.286.54.F12	MYRKYGKLITNLLATDQSHYVDQQDDGTYRKKAGVVNSELIKQVLLNQKSIAIYQKNSDLTIKWICFDFDILKSCIDSGLVARGEKELKKTIDVFCNTLEQNEIPFLLEYSGNRGFHVWITFDEALNYRSGFDIQQAILQDVNLNFDSSLIGIDLFPHSATPTGGVGLGVKIPLSKHKKSGCYSYLLPNRKEVEKVQKIDTLSDAMLSENINILENHTSTNRSALEKCLGTFFESYESENVQYNRIKSIKVQRKPFNLQALLDLWSDVKPLKKLAQKIEFGESLTHQERVLIVGLLCNLECKDEPNLSNIILHEIFSKLDNYDEKVTESAVQALKNFNFPIQDKIESTLSCKFDDSLSVEELIKLCIPNFLEYTEANFEFSNKDIEITRAAELNYLFMN…	38	38	41	41	41	42	43	48	53
80.8424	10N.286.54.E3 - 1.068.O.	1.068.O.	MG592445	LLCVLPCGSPVQRRLCLTAWIITLCIVVSTWIRNRYTLIN	10N.286.54.E3	MTSQAISPRTIGQCIYEGDIYNFVDILDPEKKKELIDSAYSASLSSELSFSTVQIKRNGKSCYTLKDFDQVLISRNLANNLRKVLDKPKSRNQISRQLVQHLKEGTSYRIYRLDIKSFFESVEYSTIQSSLEKSKVSNQTRLLISSIVKGLNQPDDKGIPRGLEFSPSIAELVLSDFDKKMKNHKDVFFYCRYVDDIIVITTGFEDQKIFLKCIKRNLPNELSLNYNKQKVIFVDSRTKQDKVVATFDYLGYNYSVRDTETRANKNLFREVDISLSTSRIKKIKTRISRSLFCFSKDGNFEILKQRLDFLTSNRLMKDKKSKRIIATGIYYNNVNLTDDSESLIELDEYLKKTILGYSCKRGANFTNTLSKSQKRELLKFSFMNGYRNNNYKKFSPDKL…	38	38	41	41	41	42	43	48	53
79.1026	10N.261.45.F4 - 1.004.O.	1.004.O.	MG592391	MTKFLSHLMLATYQSNTHKFMSDGEMGKIYEVTHTHVSYSRKRLIKEGHSFAFNTSVTKSNMPVQTYKYVGQTNLGLVCVDEKKDAMDGDTLLRLRYRMQSPSVPARQFPVEPGHVSLLGISSLV	10N.261.45.F4	MCLDFGAAQFLSFEFWDARADIFVMIIAFFALVFAIIQILSSRNEARRATAYASYQSYLNLCFEHPELARGTKMNITSDPATYSKYRWFIAQMLFCFEQVLDAEPNSDTWNEAIKSQLKRHVWHLEVSKSVARKEWSSRLRKHLPEPREQTTAELISG*	42	42	45	45	45	46	47	52	57
71.778	10N.286.55.B3 - 1.072.O.	1.072.O.	MG592449	MTKFLSHLMLATYQSNTHKFMSDGEMGKIYEVTHTHVSYSRKRLIKEGHSFAFNTSVTKSNMPVQTYKYVGQTNLGLVCVDEKKDAMDGDTLLRLRYRMQSPSVPARQFPVEPGHVSLLGISSLV	10N.286.55.B3	MSAKSPTWYRSRGYLHFDLPISCVKAKRLVTNPELVARHAFFPLINYSVESKKISKDKTSSRIDVTYKERPIAYSSHVDSHIYAYYAEIISAKYEEKLKELDLCDCVLAFRGLGKSNIDFAHEAFEQIKNMGECSAVALDFSKFFDTLDHELLKQSWATIFGSSKLPQDHFNVFKSITKFSKVNKVELYKELSISHNNPKHGRNRVCSSKDFRDIVRAKKLIKTNPDSFGIPQGSPISALLSNIYMLEFDSEMNRYVKMHGGKYYRYCDDMLFIVPTGLKKAVAGFAQKKVNGLKVSINPKKTELRTFTKQNGILVADQMLQYLGFMFDGENAYIRSSSLARYSEKMRRGVSLAKKTMIKYNAIRQSKGLDEQPLYKRKLYSRYTHLGGRNFITYGLRA…	42	42	45	45	45	46	47	52	57
71.5569	10N.286.52.F11 - 1.125.O.	1.125.O.	MG592500	LKTLISPYGGFFRFTPFTASPECGAPLTHFPFLVKFKSHKCDVYPQIC	10N.286.52.F11	MKNTSEHPWFTKRNYLHFDIPVSVHKAERIASEPITVARHAFFPFISYSFQLTKLDRDTSTGKLYRKPKPRGVAYSSHVDSHIYAFYASQLSTLYEKQIEKLGLHESVLAFRKLDGKSNIHFADDAFKHISKFEDCSVIALDFSKFFDTLDHQILKEEWRKLLGEDCLPKDHYNVFRSLTKFSTVDKCALFDLFDISQYNPKANGRNRVCSPSEFRQKVRGSGLIEQNPNGMMGIPQGSPISALLSNIYMLNFDAQMKSYVDSVDGKYFRYCDDMLFIVPSEHRDMIEKLANSKVTALKVKINSDKTEIRDFRIHDGKLSSFDEHGKQKPLQYLGFLFDGHSIFLRSTALARYSEKMKGGVKLAKKTMEKENRIRRDKGEPEQTYLYKRKLHKLYTARG…	24	24	27	27	27	27	28	31	35
69.5013	10N.286.55.B3 - 1.066.O.	1.066.O.	MG592443	MTKFLSHLMLATYQSNTHKFMSDGEMGKIYEVTHAHVSYSRKRLIKEGHSFAFNTSVTKSNMPVQTYKYVGQTNLGLVCVDEKKDAMDGDTLLRLRYRMQSPSVPARQFPVEPGHVSLLGISSLV	10N.286.55.B3	MSAKSPTWYRSRGYLHFDLPISCVKAKRLVTNPELVARHAFFPLINYSVESKKISKDKTSSRIDVTYKERPIAYSSHVDSHIYAYYAEIISAKYEEKLKELDLCDCVLAFRGLGKSNIDFAHEAFEQIKNMGECSAVALDFSKFFDTLDHELLKQSWATIFGSSKLPQDHFNVFKSITKFSKVNKVELYKELSISHNNPKHGRNRVCSSKDFRDIVRAKKLIKTNPDSFGIPQGSPISALLSNIYMLEFDSEMNRYVKMHGGKYYRYCDDMLFIVPTGLKKAVAGFAQKKVNGLKVSINPKKTELRTFTKQNGILVADQMLQYLGFMFDGENAYIRSSSLARYSEKMRRGVSLAKKTMIKYNAIRQSKGLDEQPLYKRKLYSRYTHLGGRNFITYGLRA…	42	42	45	45	45	46	47	52	50
68.8997	10N.286.51.F11 - 1.196.O.	1.196.O.	MG592565	MAIVWLKLGCRCWCFYVGKRTPPPRSTRGVLMATGSY	10N.286.51.F11	MNNIKLDKKDHSRALLTDTYPADVPIVFSNDGLYINGHIVRKSASDKKSKVVSDIYIALINPELNSSLNLADRKREQLKQTTPFKYKIIKNDVSLRTLSLIHPRSQINYSDIYREHSDYLVSLCDKSNFSIRAPMKVCNSFYFKDGSKVKSNAYKEIKIETIEEEMYKKHASSYFSYKGFNRIHKLYSSPLYKELESKFPFMFFLDVANCFDSIYTHTIAWAAKDKDYIKDNYVNWSNQFSQKLDTTMQRSNANETNGIPIGSEFSRIFSEVIFQRIDINIEKTLESEYSYINRVDYQVLRYVDDYIVFGMTDEICTIVSNTISDCLSDYNLYINSDKVSKLERPFCTDKSKTIISMSKCLEYFENTIFSKEYLSSRRYFPSQIFKKHNFMNKFMNEVR…	32	32	35	35	35	36	37	41	45
68.1772	10N.261.51.B1 - 1.062.O.	1.062.O.	MG592440	VFGAAPAFHPPFLLVHTSPFLSNLNLINVMYIRKYA	10N.261.51.B1	MLQQSFTDKNLKKIFLVQNRKGAFLEGSFFPTVKAYSHKLTRIKKKIKKHKSKEPNLSTSLYKSQLNRLYKVKDKLYEERDGAIDVEMKKVSALISHKQFSIQISSGKFVDSKPTYKIPNDAQSYFAEKKLQINIKNECHTSLASRDHIVPSLSNVLSDKFPKIVIRTDIESFYESIDHNILNSKVENSSLSTQSKKLIRKILQEYCNLSNTSKGLPRGIGVSSYLSELYMDEFDDELRKLDGVYFYQRYVDDIIIVISKPKACDVTNILNEVIKSARKIELTTKATKTKTFNTFTVGNYNFEYLGYKFTKQDGHPIKIELSRNKLAKYRSKVDYSINSYSSSNKRDKDKRLLIDRIRFLTGNTKLTNNKGGAFTGIYSSNQWVTDPSQLNGLDQYFNN…	27	27	30	30	30	31	32	36	40
68.0199	10N.222.51.F6 - 1.171.O.	1.171.O.	MG592538	MLHETLKHVAPLCDALEKNLEDFDGDASLLAHQSAELIVWTQTLQSLFDLEPSNPHKALTALDESIASLQAVRKHVFAAAEQRVLAGESVDGFTVSQGKATRSIPDYNAAVALLESAAGIPNSWLFENKPLGLPAIEKLLVAQKIKPDAREALLSQFVVVKEGKSKVVKV	10N.222.51.F6	MSLEKHLASVIKEEAEKLIQRYHEYHNRLHLEHVRNQKRLGISAPPKIVHQPNYWSIDKKFNPFYVRKKHKSIAKSIAKKIEERTYTPNPAYIKIVPKADGGERNVSIFQIPDAAVSKLFFNRLLAKNKHRFSSFSYAYRNDRNVHFAIQDISVNLRRNERTFLAEFDFSDYFGSISHDYLVKQFDQNGFFISPEERYIIKAFLKDRSVGIPQGTSISLFLANLTCWNFDSDLENEGVKFSRYADDTIVWTQDYSKICNAFGLINRFSKDAGVKINAAKSEGISLLTKEDFPSEISAKNSLDFLGYTLSVDNVSIKDKSLLKIKKQISYILYRNLIQPLKQASLAGQEIPANNRDKNFLSAMMQIRRYMYGGLSKKQIKDYLSGRTKRIYFKGVMSFYP…	31	31	34	34	34	35	36	40	44
67.4286	10N.261.45.E10 - 1.125.O.	1.125.O.	MG592500	LKTLISPYGGFFRFTPFTASPECGAPLTHFPFLVKFKSHKCDVYPQIC	10N.261.45.E10	METLVQWATALSPAVSGGVAIWAILVAKKTISENKEIAKKTVADTAYQTYLQLAMENPDFAKGYSAVSARDPKYDKYVWYIARMLFCFEQVIEVKDSLKDESWDKTLTKHLGFHAEHFKKTKVVEEKLYCTPVLDLIQLSQK*	24	24	27	27	27	27	28	31	35
66.9257	10N.261.45.F4 - 1.037.O.	1.037.O.	MG592421	MIGMGLLIGGLWLRGNVHKGRAEKQAERAEKAEVDNVILHEQVRSKTKQDIIKKEGRKNEKAIADTVDTAVERVDLGVYNSDTSAD	10N.261.45.F4	MCLDFGAAQFLSFEFWDARADIFVMIIAFFALVFAIIQILSSRNEARRATAYASYQSYLNLCFEHPELARGTKMNITSDPATYSKYRWFIAQMLFCFEQVLDAEPNSDTWNEAIKSQLKRHVWHLEVSKSVARKEWSSRLRKHLPEPREQTTAELISG*	43	43	46	46	46	47	48	53	58
64.5417	10N.286.55.E3 - 1.095.O.	1.095.O.	MG592469	MAYIMANLIFLASSLCIVVVARNTKTGVVDIAFILMFHLLGSVGIAALFAN	10N.286.55.E3	MSRQSFSEKNLETVLKYRKKQSRIIFNKESKLTFSEIESKVNDNNYKIGCFSSFRINNDDIYQAELRDDDIVISKLDYNIRSIYRVKQKDRHTIVKQILSMLKEHTPKYIYRLDIKKFYESVDLDVVSNKLVNDNILSSQSEFVLLEYSKAIKEHSIQGIPRGVGLSATLSEVYMKGFDRKISNSEFVTYYTRFVDDILIMSSKRLNIKDEIISHLPIGLTLNWKKTKVTKVMSCYCNDNCQCNRVCDCWSKCKCHKAPSKEKFFSYLGYEFLFPEIITKNHNKNVKVGLAPSKFKKIRNRIYLSFQDYSNNGNFKLLNNRIKFLTGNHYLSRSKGRTDTIKSGVYYNYIHLDVLDKHVELDKYLKTMIKSWNSKKICLNSIHKEYLNKYSFVSGFKNK…	44	44	47	47	47	48	49	54	59
63.0363	10N.286.54.E3 - 1.066.O.	1.066.O.	MG592443	MTKFLSHLMLATYQSNTHKFMSDGEMGKIYEVTHAHVSYSRKRLIKEGHSFAFNTSVTKSNMPVQTYKYVGQTNLGLVCVDEKKDAMDGDTLLRLRYRMQSPSVPARQFPVEPGHVSLLGISSLV	10N.286.54.E3	MTSQAISPRTIGQCIYEGDIYNFVDILDPEKKKELIDSAYSASLSSELSFSTVQIKRNGKSCYTLKDFDQVLISRNLANNLRKVLDKPKSRNQISRQLVQHLKEGTSYRIYRLDIKSFFESVEYSTIQSSLEKSKVSNQTRLLISSIVKGLNQPDDKGIPRGLEFSPSIAELVLSDFDKKMKNHKDVFFYCRYVDDIIVITTGFEDQKIFLKCIKRNLPNELSLNYNKQKVIFVDSRTKQDKVVATFDYLGYNYSVRDTETRANKNLFREVDISLSTSRIKKIKTRISRSLFCFSKDGNFEILKQRLDFLTSNRLMKDKKSKRIIATGIYYNNVNLTDDSESLIELDEYLKKTILGYSCKRGANFTNTLSKSQKRELLKFSFMNGYRNNNYKKFSPDKL…	42	42	45	45	45	46	47	52	50
62.2449	10N.286.55.B3 - 1.068.O.	1.068.O.	MG592445	LLCVLPCGSPVQRRLCLTAWIITLCIVVSTWIRNRYTLIN	10N.286.55.B3	MSAKSPTWYRSRGYLHFDLPISCVKAKRLVTNPELVARHAFFPLINYSVESKKISKDKTSSRIDVTYKERPIAYSSHVDSHIYAYYAEIISAKYEEKLKELDLCDCVLAFRGLGKSNIDFAHEAFEQIKNMGECSAVALDFSKFFDTLDHELLKQSWATIFGSSKLPQDHFNVFKSITKFSKVNKVELYKELSISHNNPKHGRNRVCSSKDFRDIVRAKKLIKTNPDSFGIPQGSPISALLSNIYMLEFDSEMNRYVKMHGGKYYRYCDDMLFIVPTGLKKAVAGFAQKKVNGLKVSINPKKTELRTFTKQNGILVADQMLQYLGFMFDGENAYIRSSSLARYSEKMRRGVSLAKKTMIKYNAIRQSKGLDEQPLYKRKLYSRYTHLGGRNFITYGLRA…	38	38	41	41	41	42	43	48	53
61.4911	10N.286.49.B9 - 1.066.O.	1.066.O.	MG592443	LLIAWVAGFVIAKGFWPTLFCVIPFWSFYLVVEKVMTVLGWL	10N.286.49.B9	MFDQAFTKRNLARQIRKSDFITHKDLIKEDIKKSLISDAVDFSETSLFSPNDFKTKKVKGKPVYFLDQLHKELVLRKATENIQRTYKKKQSDRDIIVKQISSLVKEGIAYKLYKLDIMSFYESINRDYLLDKIDSEPSINYRTKLLVDNFVTQFNKSGNTGLPRGMSISATLSEIFLSDFDSYIKSHEHVFYYARFVDDIIIITSSKEGKGFENEIKQQLPKGLKLNSTKSKKKVISLNTAKKEDSYKVKKKVRYQFEYLGYHFSILPPPIKNNPHCFRGLNIDIAESKQKKIKTRIIKSFVYYYKFGDFNLLLDRIKLLTSNFSLLDKKKNIQVMSGLYYNYKRIDIDSSESIRALDKTLKYYTHTNPKICKGINHSLTKIQKRKLASYSFELGFRNR…	39	39	42	42	42	43	44	49	54
61.3297	10N.286.54.E3 - 1.056.O.	1.056.O.	MG592436	ADRYRPAPSTVLYEIHFLVVSPSHCNVSGVV	10N.286.54.E3	MTSQAISPRTIGQCIYEGDIYNFVDILDPEKKKELIDSAYSASLSSELSFSTVQIKRNGKSCYTLKDFDQVLISRNLANNLRKVLDKPKSRNQISRQLVQHLKEGTSYRIYRLDIKSFFESVEYSTIQSSLEKSKVSNQTRLLISSIVKGLNQPDDKGIPRGLEFSPSIAELVLSDFDKKMKNHKDVFFYCRYVDDIIVITTGFEDQKIFLKCIKRNLPNELSLNYNKQKVIFVDSRTKQDKVVATFDYLGYNYSVRDTETRANKNLFREVDISLSTSRIKKIKTRISRSLFCFSKDGNFEILKQRLDFLTSNRLMKDKKSKRIIATGIYYNNVNLTDDSESLIELDEYLKKTILGYSCKRGANFTNTLSKSQKRELLKFSFMNGYRNNNYKKFSPDKL…	35	35	38	38	38	39	40	44	48
60.4623	10N.261.48.B2 - 1.267.O.	1.267.O.	MG592632	MAIVWLKLGCRCWCFYVGKRTPPPRSTRGVLMATGSY	10N.261.48.B2	MTCFETGWAALLDVSLWVSWANIIACIVAIVAAVFAYRQWTSSKEEARRATAYSAYSKFLELCQQSPDFAYAKENKIKANQKDYIQYRWFVAQMLFAFEQILDVLPNDEEWKVAISNQLKKHVWHLKGSGSVERKEWCKPLQALIEGLID*	32	32	35	35	35	36	37	41	45
58.1376	10N.286.55.B3 - 1.056.O.	1.056.O.	MG592436	VEVFLYLVHVHQLTYCLLMIYINCFQMYLYFLRRRGAIILS	10N.286.55.B3	MSAKSPTWYRSRGYLHFDLPISCVKAKRLVTNPELVARHAFFPLINYSVESKKISKDKTSSRIDVTYKERPIAYSSHVDSHIYAYYAEIISAKYEEKLKELDLCDCVLAFRGLGKSNIDFAHEAFEQIKNMGECSAVALDFSKFFDTLDHELLKQSWATIFGSSKLPQDHFNVFKSITKFSKVNKVELYKELSISHNNPKHGRNRVCSSKDFRDIVRAKKLIKTNPDSFGIPQGSPISALLSNIYMLEFDSEMNRYVKMHGGKYYRYCDDMLFIVPTGLKKAVAGFAQKKVNGLKVSINPKKTELRTFTKQNGILVADQMLQYLGFMFDGENAYIRSSSLARYSEKMRRGVSLAKKTMIKYNAIRQSKGLDEQPLYKRKLYSRYTHLGGRNFITYGLRA…	26	26	29	29	29	30	31	35	39
57.6578	10N.261.51.E6 - 1.139.B.	1.139.B.	MG592511	MGHKVAKCIFYDEASNIVFSAHGRPAKNMFIPVPQRGDWSDGMPKLYGAFSAGAIDRRREGITVHYRCAGFIKSTSVPGLVSRVPWLKL	10N.261.51.E6	MKEQVKKSDYNRVLLSETAPFDVPVIFSNNWFYQHMSEYESNTSSEVKKTIVNHLFLCTDPEKDFVPIKYSILKSSGGVRHLGLLHPASQTQAIELYRMFSDRVIHACSKSSYSIRKPIAISSCYYLKRNKNSSSNIIQPSTFLTYGSYNKLNKFFDSKEFLLLERKFNLFWSIDISKFFDSIYTHSISWALKSKDFAKESRDKSDFSSFFDRLMQRSNYNETNGIVIGNEVSRIFAETIMQTIDSELEKELENNHNLVYGKDYSIRRYVDDFFIFGKKNSDLELILSRLVAKLRLYKLHLNDAKSIKRSRPFITNITRAKIDTQDSISWLFNLIFGSQDSDDLKLVKKPNVVKRKFIDKIMAASYQDHQAYSVMCNYSIAALENKVDKCTKNHLFILS…	4	4	4	4	4	4	4	5	6
57.4293	10N.261.48.B3 - 1.171.O.	1.171.O.	MG592538	MLHETLKHVAPLCDALEKNLEDFDGDASLLAHQSAELIVWTQTLQSLFDLEPSNPHKALTALDESIASLQAVRKHVFAAAEQRVLAGESVDGFTVSQGKATRSIPDYNAAVALLESAAGIPNSWLFENKPLGLPAIEKLLVAQKIKPDAREALLSQFVVVKEGKSKVVKV	10N.261.48.B3	LRNKAYRSRSYLHFDLPVSFNKAKNLVTNPILVSKHAFFPLINYAVESKKISKNKDTRKIDVAVKERPIAYSSHVDSHIYAFYANVLSKKYEAKLKSAGLTESILAFRGLGKSNIDFSFEAFEQIKIMGECSAVALDFSKFFDTLDHDLLKQSWASLLGEKKLPSDHFNVFKSITKFSKVNKVELYKEFGISPNNPKNGRNRVCTAQEFRNVVRKKKLIKTNPDPFGIPQGSPISALLSNIYMLEFDAEMKRYMDIHGGKYYRYCDDMLFIVPAPLRDKVAGYAQEQVKQLKVSINPKKTELRTFSSQGGILVADQMLQYLGFMFDGENVYIRSSSLARYSEKMKRGIRLAKKTMDKYNAVRAAKGLPEKGLYKRKLYSRYTHLGGRNFVTYGLRAAST…	31	31	34	34	34	35	36	40	44
55.7299	10N.261.45.F4 - 1.056.O.	1.056.O.	MG592436	ADRYRPAPSTVLYEIHFLVVSPSHCNVSGVV	10N.261.45.F4	MCLDFGAAQFLSFEFWDARADIFVMIIAFFALVFAIIQILSSRNEARRATAYASYQSYLNLCFEHPELARGTKMNITSDPATYSKYRWFIAQMLFCFEQVLDAEPNSDTWNEAIKSQLKRHVWHLEVSKSVARKEWSSRLRKHLPEPREQTTAELISG*	35	35	38	38	38	39	40	44	48
54.2901	10N.286.54.F12 - 1.066.O.	1.066.O.	MG592443	MTKFLSHLMLATYQSNTHKFMSDGEMGKIYEVTHAHVSYSRKRLIKEGHSFAFNTSVTKSNMPVQTYKYVGQTNLGLVCVDEKKDAMDGDTLLRLRYRMQSPSVPARQFPVEPGHVSLLGISSLV	10N.286.54.F12	MYRKYGKLITNLLATDQSHYVDQQDDGTYRKKAGVVNSELIKQVLLNQKSIAIYQKNSDLTIKWICFDFDILKSCIDSGLVARGEKELKKTIDVFCNTLEQNEIPFLLEYSGNRGFHVWITFDEALNYRSGFDIQQAILQDVNLNFDSSLIGIDLFPHSATPTGGVGLGVKIPLSKHKKSGCYSYLLPNRKEVEKVQKIDTLSDAMLSENINILENHTSTNRSALEKCLGTFFESYESENVQYNRIKSIKVQRKPFNLQALLDLWSDVKPLKKLAQKIEFGESLTHQERVLIVGLLCNLECKDEPNLSNIILHEIFSKLDNYDEKVTESAVQALKNFNFPIQDKIESTLSCKFDDSLSVEELIKLCIPNFLEYTEANFEFSNKDIEITRAAELNYLFMN…	42	42	45	45	45	46	47	52	50
54.1796	10N.286.55.B1 - 1.068.O.	1.068.O.	MG592445	LLCVLPCGSPVQRRLCLTAWIITLCIVVSTWIRNRYTLIN	10N.286.55.B1	HNALLVYLSIDNRNWNKDTITSKLNELKTKSTFYDWLIENEGVSIFPKNNKKWFERNIIENGTTTLRKGNEILIRKPSSLFTSNKKDLEHSNGFSEIIVEYNREKLTTFRRYIDDIDIRARFKLLTIFLKNIQDGQNIPSVFCPERVITPDAVSVFSKEFCYHSKIISHDEVGNVSSYENSVDSFINSFLSYISESDPITKKLKEKYINNLDMDIDKVQFLIKFYSQITNESCDNSDFFFDIAMATSLYIYLSNLDSITRLERFSKQYSIFHNEVNNQDIFIVEDDMKIDDSNLHSVLFCIQNSLSKINKNLLVTIPFHLHEDILTYIKIIKEQISSSHLEKDNITLKDFKISQVNAFLTSRTVRIDNQSYAFNDVLIVNPKLKEVVSFEMKHLALING…	38	38	41	41	41	42	43	48	53
53.4181	10N.261.52.B10 - 2.092.O.	2.092.O.	MG592663	VFGAAPAFHPPFLLVHTSPFLSNLNLINVMYIRKYA	10N.261.52.B10	MLHSPESIVGSFGTISDWFAHLLQHGLQWPGFSSSYIEEEEILSIKNLDDFASCLKKRLETLESYVCQSSDVPSLPTVIKRPELKQDLFRVVTVQQLFPKDKDFHLSDVTLDHPNIRWKHREHLAEICKLTEQTLSAKLRTGSREYKSTADLIVFSEVAVHPEDEDIIRGLALKTKSIVFAGFVFTEHDGRIVNKARWIIPDKAEFGMQWRIRDQGKHHMTDGESSLGVMSYRPCQHIIEILGSPEGPFKITGAICYDATDIQLAADLRDKTDMFVIAAHNKDVNTFDNMASALQWHMFQHIVIANTGEYGGSTMQAPYKENYHKLISHAHGANQIAISTADIDLAAFRRKVKEYKKTKAQPAGFARKH*	27	27	30	30	30	31	32	36	40
51.5375	10N.261.48.B3 - 1.283.A.	1.283.A.	MG592651	MKTPIQHLESVANFLRGVRLDPRTPSDVRAAIDGRTDAIDEFTESNGWIPVAQSLPEDTDHIIMCDENGGRFSGQGSVLKHNLKKPEPTHGKTTRYTHWQLMPEAPL	10N.261.48.B3	LRNKAYRSRSYLHFDLPVSFNKAKNLVTNPILVSKHAFFPLINYAVESKKISKNKDTRKIDVAVKERPIAYSSHVDSHIYAFYANVLSKKYEAKLKSAGLTESILAFRGLGKSNIDFSFEAFEQIKIMGECSAVALDFSKFFDTLDHDLLKQSWASLLGEKKLPSDHFNVFKSITKFSKVNKVELYKEFGISPNNPKNGRNRVCTAQEFRNVVRKKKLIKTNPDPFGIPQGSPISALLSNIYMLEFDAEMKRYMDIHGGKYYRYCDDMLFIVPAPLRDKVAGYAQEQVKQLKVSINPKKTELRTFSSQGGILVADQMLQYLGFMFDGENVYIRSSSLARYSEKMKRGIRLAKKTMDKYNAVRAAKGLPEKGLYKRKLYSRYTHLGGRNFVTYGLRAAST…	51	51	54	54	54	49	50	55	60
51.5316	10N.286.55.E3 - 1.215.A.	1.215.A.	MG592585	MTTIKSNISDAQLLKDIGLIGRFQLIDVAAQQEGHPAGDAILTAPNKALGQADYCYYIQLVGQQVEISIPVGIYDEYEESVHDIGAALSSECTDFFEEVYDTVTGFYLKAQSLLTAKPVSPTIATLKGTQDNSTEGKPKPVSTGAILHYNDALSASTSQNPISLRDAEFLYQPVEGTKSKYYVICLTTTGLKIAASYKNKILKVRVLDTWYNPLNTEYLKDLTKDFVLIKKTGGHYSSAYLDLTPTQAQRFLWAMLATFDPLHIRTGLPQIEDFKG	10N.286.55.E3	MSRQSFSEKNLETVLKYRKKQSRIIFNKESKLTFSEIESKVNDNNYKIGCFSSFRINNDDIYQAELRDDDIVISKLDYNIRSIYRVKQKDRHTIVKQILSMLKEHTPKYIYRLDIKKFYESVDLDVVSNKLVNDNILSSQSEFVLLEYSKAIKEHSIQGIPRGVGLSATLSEVYMKGFDRKISNSEFVTYYTRFVDDILIMSSKRLNIKDEIISHLPIGLTLNWKKTKVTKVMSCYCNDNCQCNRVCDCWSKCKCHKAPSKEKFFSYLGYEFLFPEIITKNHNKNVKVGLAPSKFKKIRNRIYLSFQDYSNNGNFKLLNNRIKFLTGNHYLSRSKGRTDTIKSGVYYNYIHLDVLDKHVELDKYLKTMIKSWNSKKICLNSIHKEYLNKYSFVSGFKNK…	45	45	48	48	48	50	51	56	61
51.4452	10N.261.45.E10 - 1.282.A.	1.282.A.	MG592650	MKINKQIKTHIADMAIRKKYKAEFEKKLAALSVIGFDIVYDLNHNEDFDVLPDRAKSLIQTVQGIDLKDDIRMGSYKPSRYYEERGYLLDTAFQTRDTIKRVGFDKKVYSASNYRGNANQPEAFDAPVKELHVFLKEASQARQTLLDAMAHYKSCKKMFAELPWAETYYPEAEKKPVVNVVPVSTIAAANELMEL	10N.261.45.E10	METLVQWATALSPAVSGGVAIWAILVAKKTISENKEIAKKTVADTAYQTYLQLAMENPDFAKGYSAVSARDPKYDKYVWYIARMLFCFEQVIEVKDSLKDESWDKTLTKHLGFHAEHFKKTKVVEEKLYCTPVLDLIQLSQK*	46	46	49	49	49	51	52	57	62
51.1246	10N.286.52.A2 - 1.196.O.	1.196.O.	MG592565	MAIVWLKLGCRCWCFYVGKRTPPPRSTRGVLMATGSY	10N.286.52.A2	MFDQAFTKRNLARQIRKSDFITHKDLIKEDIKKSLISDAVDFSETSLFSPNDFKTKKVKGKPVYFLDQLHKELVLRKATENIQRTYKKKQSDRDIIVKQISSLVKEGIAYKLYKLDIMSFYESINRDYLLDKIDSEPSINYRTKLLVDNFVTQFNKSGNTGLPRGMSISATLSEIFLSDFDSYIKSHEHVFYYARFVDDIIIITSSKEGKGFENEIKQQLPKGLKLNSTKSKKKVISLNTAKKEDSYKVKKKVRYQFEYLGYHFSILPPPIKNNPHCFRGLNIDIAESKQKKIKTRIIKSFVYYYKFGDFNLLLDRIKLLTSNFSLLDKKKNIQVMSGLYYNYKRIDIDSSESIRALDKTLKYYTHTNPKICKGINHSLTKIQKRKLASYSFELGFRNR…	32	32	35	35	35	36	37	41	45
50.7602	10N.286.52.F11 - 1.011.O.	1.011.O.	MG592396	VFGAAPAFHPPFLLVHTSPFLSNLNLINVMYIRKYA	10N.286.52.F11	MKNTSEHPWFTKRNYLHFDIPVSVHKAERIASEPITVARHAFFPFISYSFQLTKLDRDTSTGKLYRKPKPRGVAYSSHVDSHIYAFYASQLSTLYEKQIEKLGLHESVLAFRKLDGKSNIHFADDAFKHISKFEDCSVIALDFSKFFDTLDHQILKEEWRKLLGEDCLPKDHYNVFRSLTKFSTVDKCALFDLFDISQYNPKANGRNRVCSPSEFRQKVRGSGLIEQNPNGMMGIPQGSPISALLSNIYMLNFDAQMKSYVDSVDGKYFRYCDDMLFIVPSEHRDMIEKLANSKVTALKVKINSDKTEIRDFRIHDGKLSSFDEHGKQKPLQYLGFLFDGHSIFLRSTALARYSEKMKGGVKLAKKTMEKENRIRRDKGEPEQTYLYKRKLHKLYTARG…	27	27	30	30	30	31	32	36	40

[truncated: 10 more sheets: x_Druantia, xi_Gabija, xii_Lamassu, xiii_Paris, xiv_Retron, xv_RM, xvi_Septu, xvii_Shedu, xviii_Wadjet, xix_Zorya]
